# Supplementary material for: Contribution of ADD3 and the HLA Genes to Biliary Atresia Risk in Chinese
Source: MDPI journal article supplement (doi:10.3390/ijms241914719), 2023-09-29
Supplement: s1 [file s1]

## Supplementary Figures

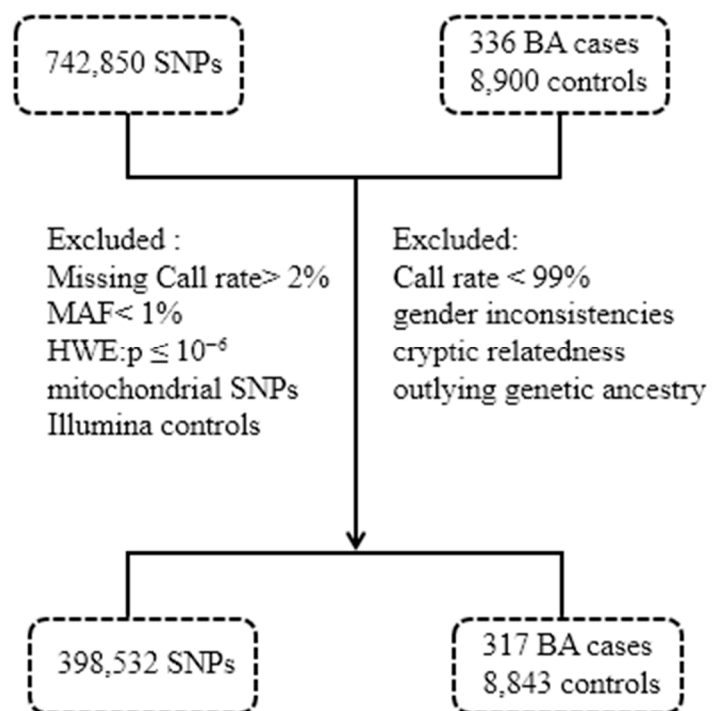

**Figure S1.** The flowchart for quality filtering in GWAS data. Quality filtering was performed on SNPs and samples before analysis to ensure robust association tests.

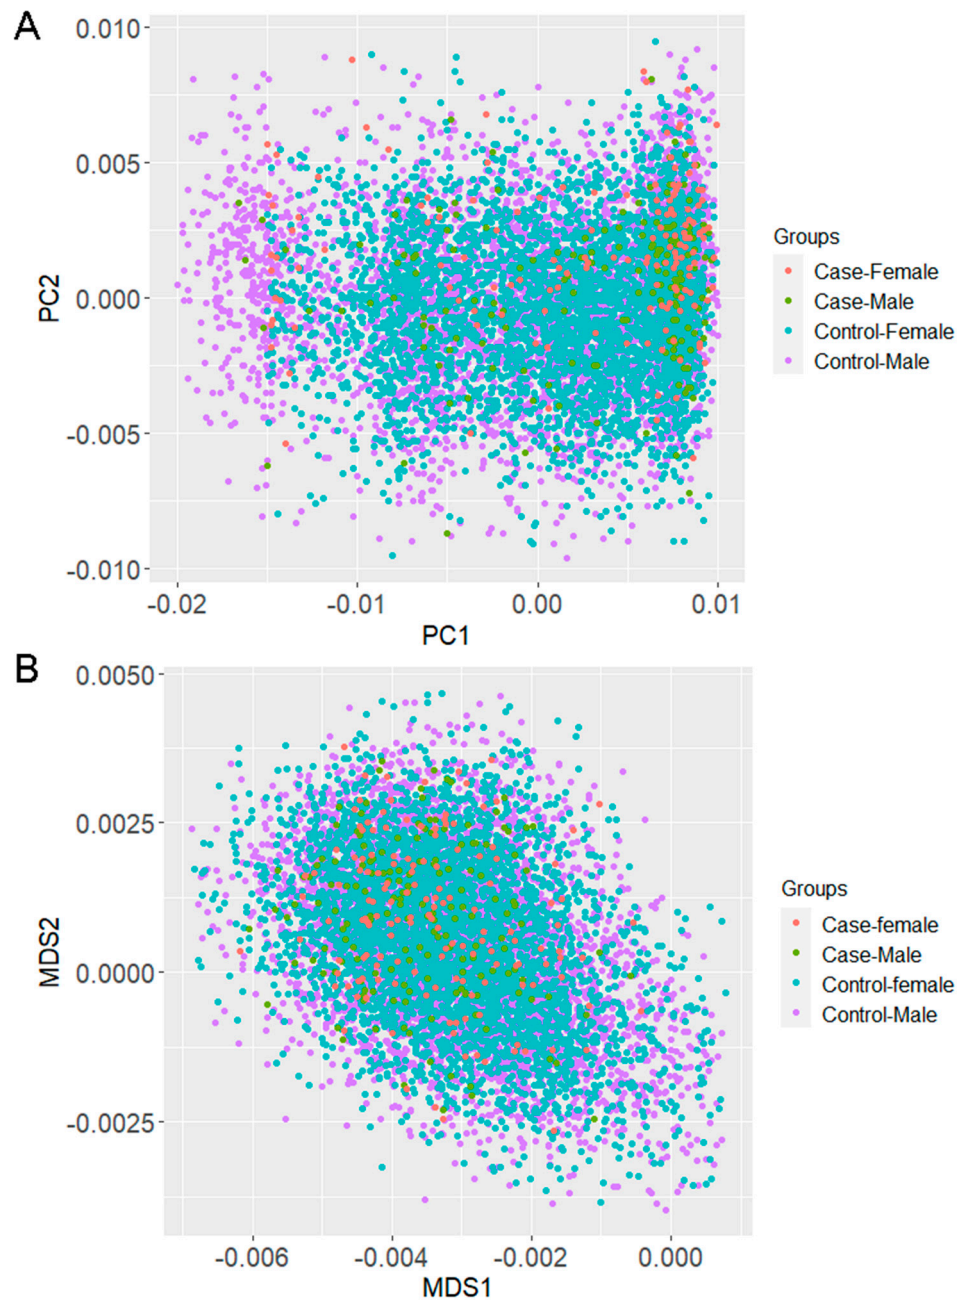

**Figure S2.** Plots of principal component analysis (PCA) and multidimensional scaling (MDS) analysis of GWAS samples. **(A)** Principal components of 317 BA cases and 8,843 controls were plotted using the first two eigenvectors produced by the EIGENSOFT software. **(B)** The first and second dimension values of 317 BA cases and 8,843 controls were produced by PLINK. The identity-by-descent (IBD) pairwise distances among all the samples were used to construct dimensions and MDS analysis (<http://pngu.mgh.harvard.edu/purcell/plink/>). No significant structures were observed in the current cohort.

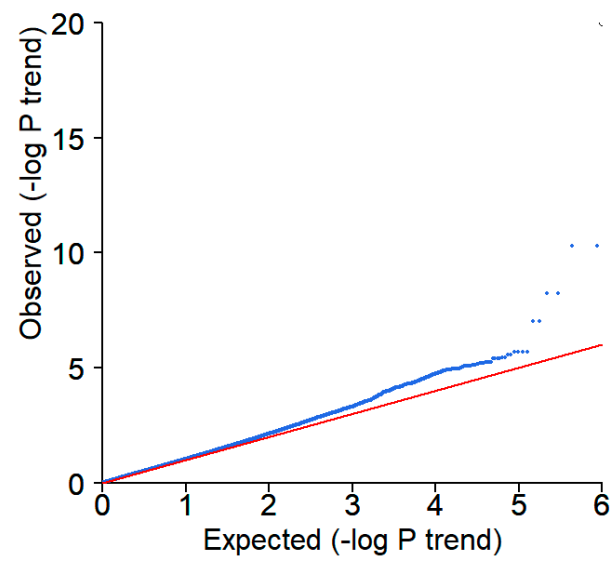

**Figure S3.** Quantile-quantile (Q-Q) plot of GWAS results for BA risk

## Multi-tissue eQTL Comparison

ENSG00000148700.14 ADD3 and chr10\_109975992\_C\_T\_b38 eQTL (Meta Analysis RE2 P-Value: 3.668709999999998e-253)

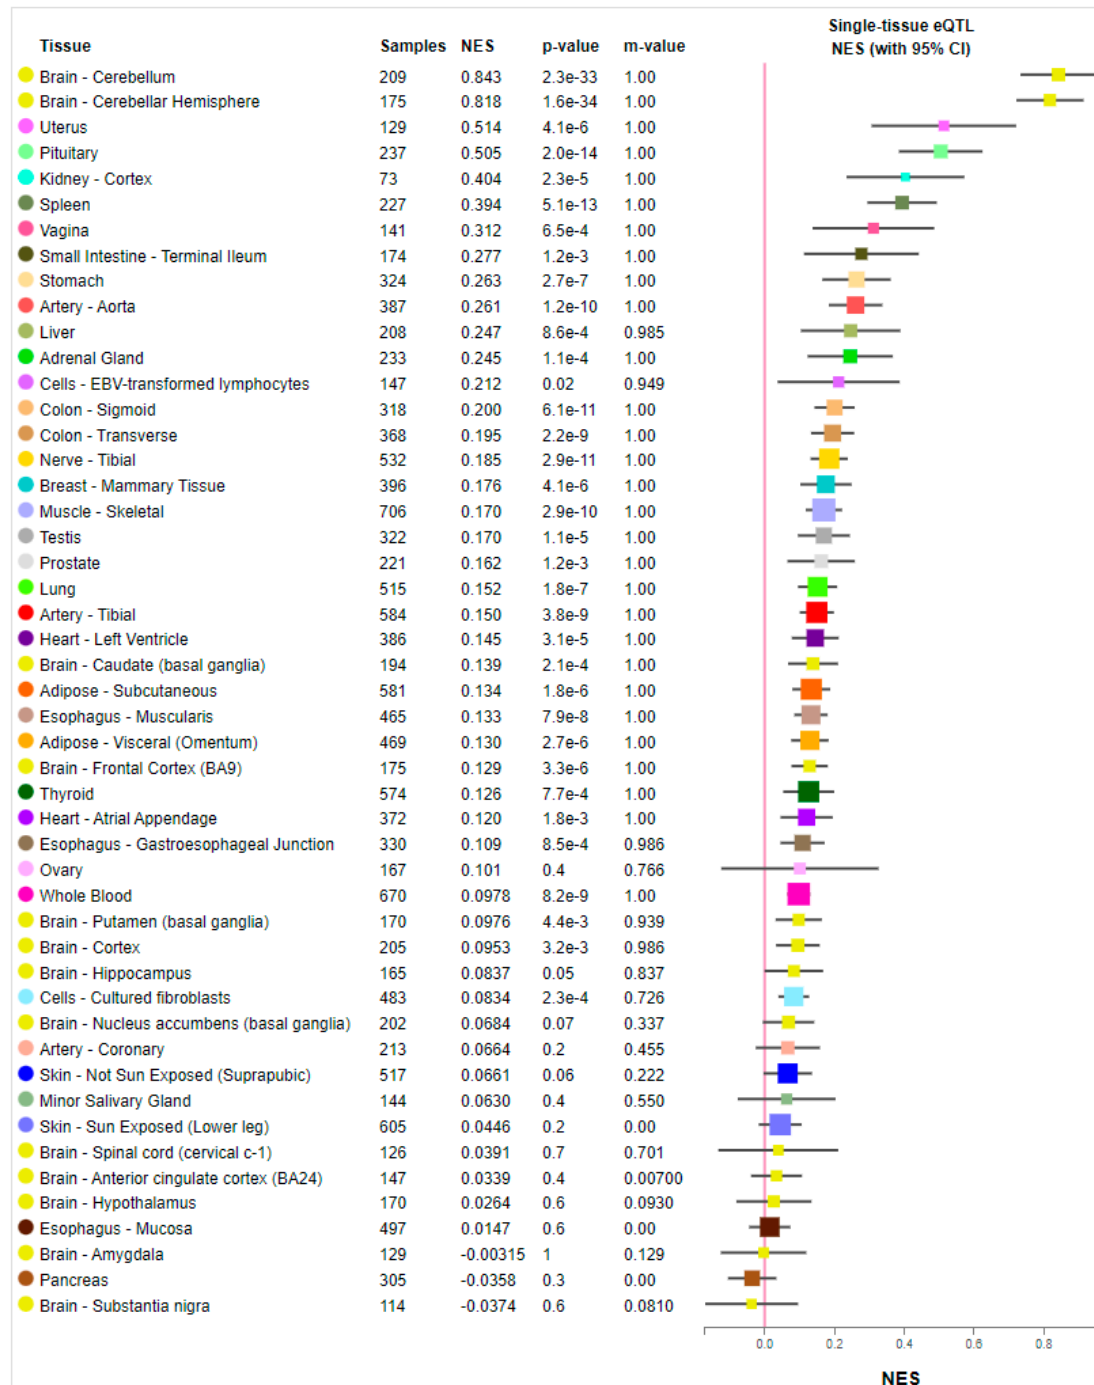

**Figure S4.** eQTL plot for rs17095355 genotypes related with *ADD3* expression. The plot was based on genotype and transcriptome data from the GTEx Analysis Release V8 (dbGaP Accession phs000424.v8.p2). Rs17095355 risk allele T is associated with increased level of *ADD3* expression in most of the body tissues. Spleen (n = 227,  $P_{\text{GTEx}} = 5.1 \times 10^{-13}$ ); Whole blood (n = 670,  $P_{\text{GTEx}} = 8.2 \times 10^{-9}$ ). See also in Aging (Albany NY). 2020 Apr 21;12(8):7163-7182.

## Multi-tissue eQTL Comparison

ENSG00000148700.14 ADD3 and chr10\_110003177\_G\_C\_b38 eQTL (Meta Analysis RE2 P-Value: 0)

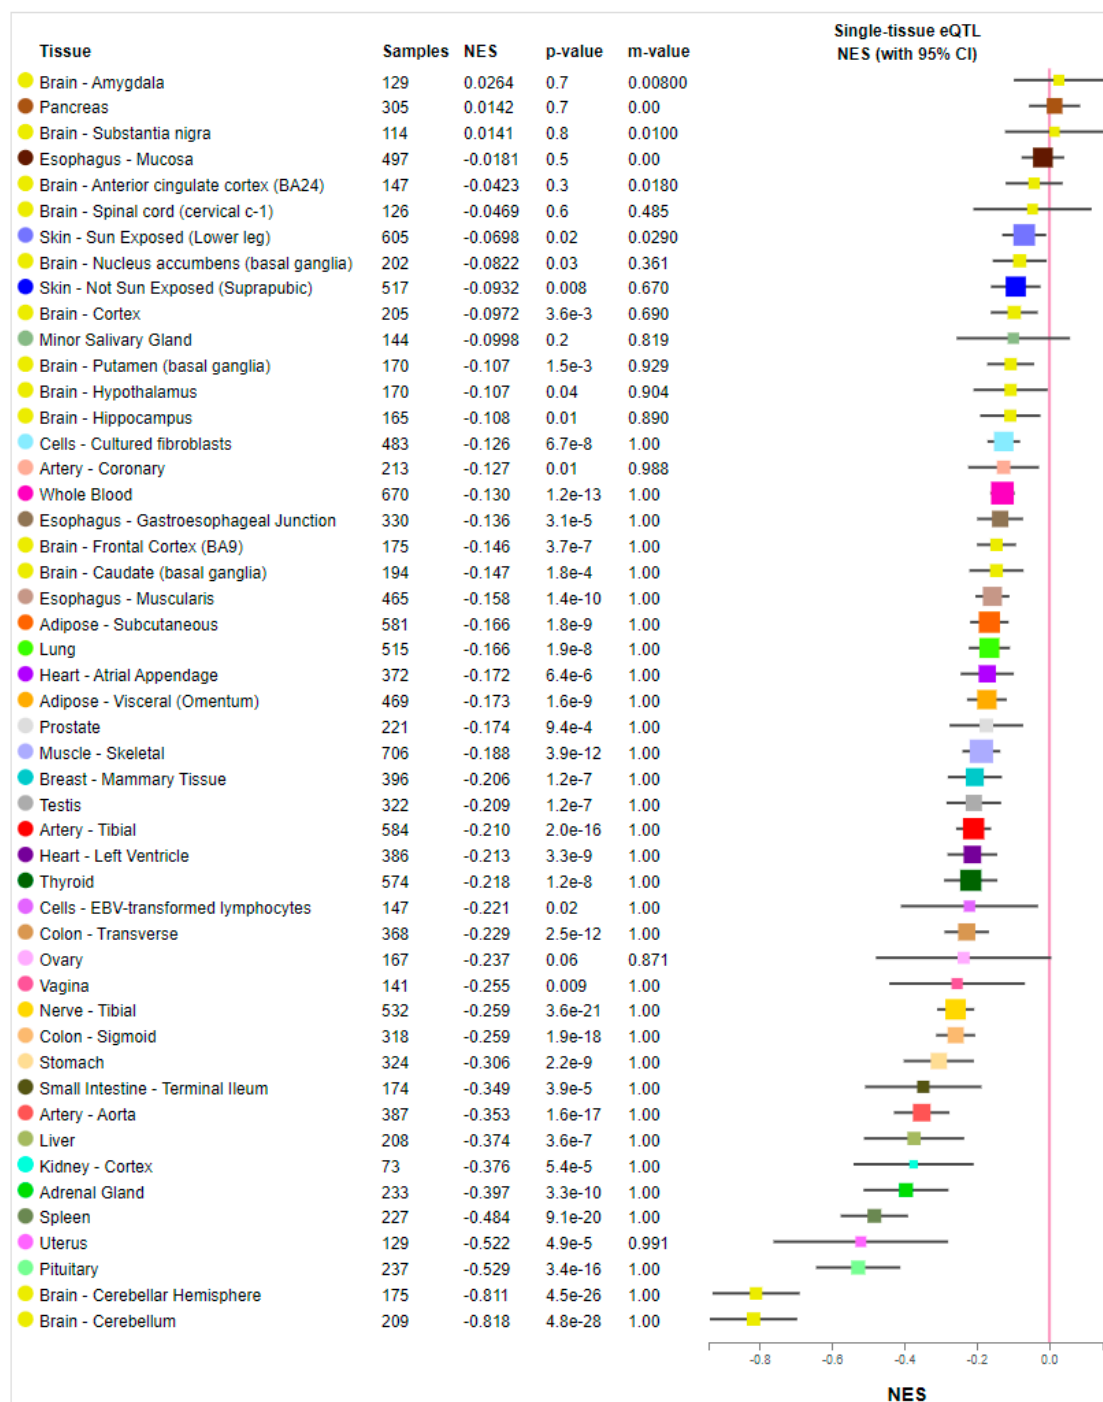

**Figure S5.** eQTL plot for the imputed SNP rs3862007 genotypes related with *ADD3* expression. The plot was based on genotype and transcriptome data from the GTEx Analysis Release V8 (dbGaP Accession phs000424.v8.p2). The rs3862007 risk allele T is associated with increased levels of *ADD3* expression in liver ( $n = 208$ ,  $P_{\text{GTEx}} = 3.6 \times 10^{-7}$ ), spleen ( $n = 227$ ,  $P_{\text{GTEx}} = 9.1 \times 10^{-20}$ ) and whole blood ( $n = 670$ ,  $P_{\text{GTEx}} = 1.2 \times 10^{-13}$ ).

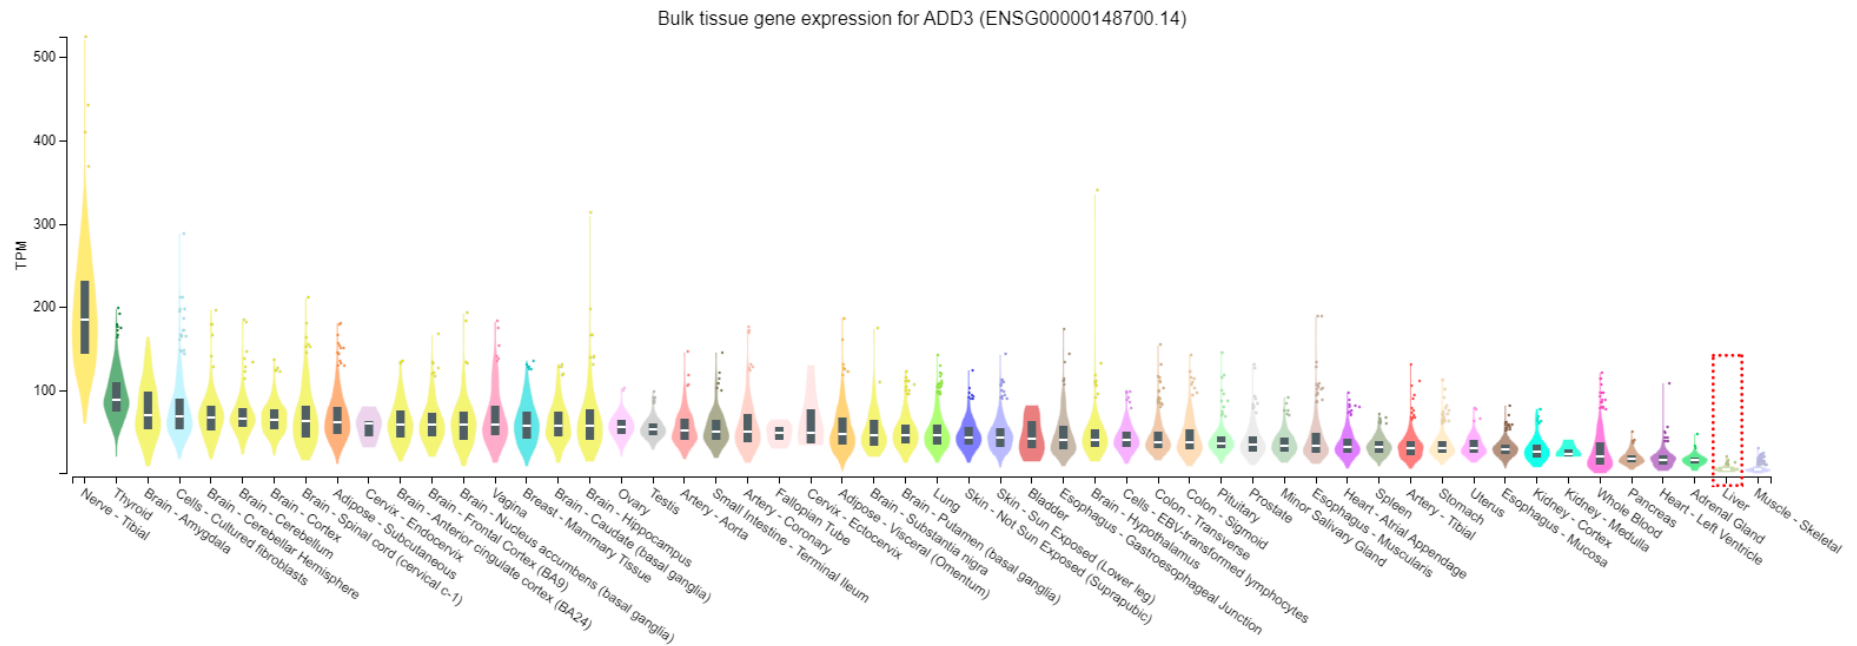

**Figure S6.** Bulk tissue gene expression for ADD3 (ENSG00000148700.14). Data Source: GTEx Analysis Release V8 (dbGaP Accession phs000424.v8.p2).

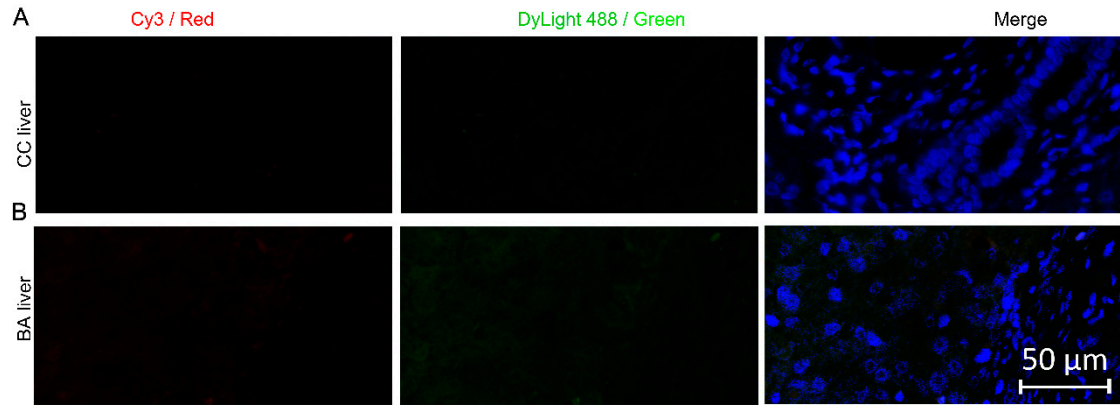

**Figure S7.** Negative control for immunofluorescence detection of ADD3 in (A) choledochal cyst (CC) and (B) BA liver sections. Alexa Fluor 488-conjugated rabbit anti-goat IgG (Red) and Cy3-conjugated goat anti-mouse IgG (Green) were used as the secondary antibodies. Blue color: DAPI staining of nuclei. 400 $\times$  magnification. Scale bar: 50  $\mu\text{m}$ .
