# Supplementary material for: Contribution of ADD3 and the HLA Genes to Biliary Atresia Risk in Chinese
Source: Int J Mol Sci. 2023 Sep 29;24(19):14719. doi: 10.3390/ijms241914719 (PMC10572496; doi:10.3390/ijms241914719)
Supplement: Supplementary file 1 [file ijms-24-14719-s001.zip › ijms-2598824-Supplementary Tables S1-S4.xlsx]

## Sheet: Supplementary Table S1
	Supplementary Table 1. Clinical and liver biochemical indexes of BA patients.
	Variables	BA patients
	Male / Female	173/144
	Age at surgery (month)	2.28 ± 0.91
	bile acid (μmol/L)	126.97 ± 49.77
	ALT (IU/L)	162.26 ± 99.71
	AST (IU/L)	247.98 ± 128.42
	ALP (IU/L)	548.95 ± 195.80
	GGT (IU/L)	631.55 ± 494.09
	TB (μmol/L)	163.59 ± 48.07
	DB (μmol/L)	114.03 ± 36.60
	BA: Biliary atresia; Data are mean ± standard deviation; ALT: Alanine aminotransferase; AST: Aspartate aminotransferase; ALP: Alkaline phosphatase; GGT: Gamma-glutamyl transpeptidase; TB: Total bilirubin; DB: Direct bilirubin.

## Sheet: Supplementary Table S2
Supplementary Table 2. Results of the typed and imputed SNPs in chromosome10q25 region in genome-wide scan
SNP	Chr. Position	PAssociation	SNP Type	imputation INFO	r2 with rs17095355	PeQTL of ADD3from GTEX
						Liver	Spleen	Whole Blood
rs17095355	111735750	4.07e-11	typed	1	1	NA	5.1e-13	8.2e-09
rs3862006	111750764	1.45692e-11	imputed	0.929462	0.94	NA	6.9e-13	2.9e-08
rs10884919	111757791	5.511e-09	typed	0.999378	0.71179	2.1e-05	9.1e-15	3.3e-11
rs3862007	111762935	4.70687e-09	imputed	0.986879	0.66	3.6e-07	9.1e-20	1.2e-13
rs6584974	111928784	1.526e-05	typed	0.999555	0.433306	NA	1.6e-14	2.8e-09
rs2274979	111631781	0.00119	typed	0.999679	0.319598	NA	5.8e-06	0.00011
rs7100154	111650150	0.04409	typed	0.998908	0.31264	NA	NA	NA
rs1245907	111528480	0.09873	typed	0.997438	0.231778	NA	NA	NA
rs11194892	111610382	0.003824	typed	0.99936	0.202695	NA	NA	NA
rs28365883	111766772	0.02507	typed	0.999145	0.199996	NA	NA	NA
rs12573269	111941371	0.03215	typed	0.999836	0.195889	NA	NA	NA
rs77652395	111947275	0.03486	typed	0.998525	0.194227	NA	NA	NA
rs7078789	111664595	0.0002108	typed	1	0.177606	NA	3.9e-05	4.8e-05
rs1245909	111531409	0.03648	typed	0.986958	0.173584	NA	NA	NA
rs1891373	111970874	0.004877	typed	0.999422	0.168729	NA	NA	NA
rs3758408	111669132	0.0006834	typed	0.99714	0.16674	NA	3.9e-05	4.1e-05
rs9804329	111849500	0.0341	typed	0.991791	0.155327	NA	NA	NA
rs2481112	111847081	0.001143	typed	0.998584	0.148222	NA	6.4e-07	1.7e-08
rs2501574	111850503	0.0005635	typed	0.999797	0.146829	NA	NA	9.9e-05
rs568298	111655065	0.0006264	typed	1	0.146684	NA	4.9e-05	1.5e-05
rs11195048	112013274	0.02183	typed	0.988037	0.145855	NA	NA	NA
rs61246605	111450164	0.08202	typed	0.9991	0.12534	NA	NA	NA
rs6584978	111956363	0.07074	typed	0.999836	0.0803937	NA	NA	NA
rs17736567	111496271	0.05227	typed	0.999151	0.070775	NA	NA	NA
rs693682	111619760	0.209	typed	1	0.063391	NA	NA	NA
rs6584977	111954970	0.01511	typed	1	0.062869	NA	NA	NA
rs76744581	111605669	0.1196	typed	0.999128	0.0628355	NA	NA	NA
rs10787225	111964133	0.003366	typed	0.999109	0.0605512	NA	NA	NA
rs11195033	111980235	0.003322	typed	0.999819	0.0592696	NA	NA	NA
rs17126701	111534453	0.3643	typed	1	0.0581624	NA	NA	NA
rs11194886	111592608	0.1745	typed	0.999094	0.0565941	NA	NA	NA
rs75707805	111490384	0.2989	typed	0.997498	0.0427046	NA	NA	NA
rs7899245	111441034	0.3048	typed	1	0.0379523	NA	NA	NA
rs116876435	111773585	0.5897	typed	0.97868	0.0353051	NA	NA	NA
rs188608326	111901104	0.1154	typed	0.997892	0.0277402	NA	NA	NA
rs4918486	111950733	0.8295	typed	1	0.0243009	NA	NA	NA
rs78761287	111873390	0.05956	typed	1	0.0213029	NA	NA	NA
rs10884933	111943436	0.8994	typed	0.999468	0.0212513	NA	NA	NA
rs118134651	111544501	0.585	typed	0.996873	0.0210227	NA	NA	NA
rs716595	112006486	0.9549	typed	0.998813	0.0164396	NA	NA	NA
rs77209201	111431034	0.09733	typed	0.992019	0.016035	NA	NA	NA
rs117214715	111619947	0.3138	typed	0.999586	0.0140456	NA	NA	NA
rs77051174	111482938	0.6896	typed	0.998706	0.0132994	NA	NA	NA
rs58677130	111993949	0.6929	typed	0.989019	0.0095136	NA	NA	NA
rs11194891	111609610	0.2363	typed	0.999705	0.00937506	NA	NA	NA
rs59453329	111449364	0.7324	typed	0.995821	0.00815283	NA	NA	NA
rs149007123	111597994	0.7809	typed	1	0.00723584	NA	NA	NA
rs139101498	111580204	0.2801	typed	0.995657	0.00248086	NA	NA	NA
rs17737439	111531367	0.4713	typed	1	0.00230062	NA	NA	NA
rs56300906	111909272	0.06598	typed	0.989628	0.00203313	NA	NA	NA
rs1342273	111973339	0.8195	typed	0.998637	0.000567795	NA	NA	NA
rs7900959	111980799	0.1608	typed	0.994948	0.000563201	NA	NA	NA
rs7918659	111928766	0.8193	typed	1	0.000457269	NA	2.1e-06	4.8e-08
rs7076772	111925250	0.9028	typed	0.999557	0.000435387	NA	5.5e-06	3.3e-07
rs12774613	111987071	0.4868	typed	0.999193	0.000223677	NA	NA	NA
rs472049	111647738	0.4856	typed	0.99915	0.000110425	NA	NA	NA
rs1936143	111437289	0.302072	imputed	0.99807	NA	NA	NA	NA
rs12761033	111437757	0.426994	imputed	0.971583	NA	NA	NA	NA
rs10884852	111437930	0.420633	imputed	0.974879	NA	NA	NA	NA
rs10884853	111438073	0.427434	imputed	0.97175	NA	NA	NA	NA
rs10787182	111438075	0.420607	imputed	0.974929	NA	NA	NA	NA
rs10884854	111438173	0.420768	imputed	0.974964	NA	NA	NA	NA
rs2226182	111438396	0.257843	imputed	0.970804	NA	NA	NA	NA
rs1936144	111439108	0.421427	imputed	0.974414	NA	NA	NA	NA
rs2211484	111439766	0.422244	imputed	0.975451	NA	NA	NA	NA
rs1954405	111439863	0.433487	imputed	0.971861	NA	NA	NA	NA
rs7898586	111440605	0.422843	imputed	0.975617	NA	NA	NA	NA
rs7915504	111440719	0.422832	imputed	0.97563	NA	NA	NA	NA
rs7900027	111441356	0.531016	imputed	0.920236	NA	NA	NA	NA
rs7899679	111441365	0.530901	imputed	0.920253	NA	NA	NA	NA
rs7910859	111441566	0.421876	imputed	0.957219	NA	NA	NA	NA
rs11194789	111442002	0.429863	imputed	0.961607	NA	NA	NA	NA
rs10787183	111442290	0.305767	imputed	0.986128	NA	NA	NA	NA
rs10884855	111442555	0.406362	imputed	0.946246	NA	NA	NA	NA
rs10884856	111442608	0.449305	imputed	0.946956	NA	NA	NA	NA
rs10884857	111443104	0.261998	imputed	0.939088	NA	NA	NA	NA
rs11194790	111443462	0.447036	imputed	0.926602	NA	NA	NA	NA
rs147163822	111443534	0.473374	imputed	0.954232	NA	NA	NA	NA
rs10884859	111444680	0.49108	imputed	0.924903	NA	NA	NA	NA
rs10884860	111445034	0.413006	imputed	0.971418	NA	NA	NA	NA
rs10884861	111445224	0.428941	imputed	0.962077	NA	NA	NA	NA
rs10787184	111445285	0.286868	imputed	0.96737	NA	NA	NA	NA
rs10787185	111445727	0.440192	imputed	0.959925	NA	NA	NA	NA
rs10749007	111445921	0.465095	imputed	0.927965	NA	NA	NA	NA
rs11194792	111446085	0.455296	imputed	0.949713	NA	NA	NA	NA
rs7393859	111446110	0.28971	imputed	0.993243	NA	NA	NA	NA
rs10787187	111446351	0.412666	imputed	0.970763	NA	NA	NA	NA
rs10884864	111447149	0.416238	imputed	0.940866	NA	NA	NA	NA
rs11194795	111448499	0.294504	imputed	0.988538	NA	NA	NA	NA
rs10749008	111448716	0.291597	imputed	0.992957	NA	NA	NA	NA
rs9919414	111449046	0.448997	imputed	0.94698	NA	NA	NA	NA
rs9919372	111449271	0.407925	imputed	0.969544	NA	NA	NA	NA
rs9919416	111449357	0.407792	imputed	0.969499	NA	NA	NA	NA
rs10787188	111449902	0.346041	imputed	0.957311	NA	NA	NA	NA
rs10884865	111450184	0.406297	imputed	0.969068	NA	NA	NA	NA
rs10884866	111450211	0.406296	imputed	0.969057	NA	NA	NA	NA
rs9919393	111450545	0.411802	imputed	0.965973	NA	NA	NA	NA
rs7919959	111450883	0.405934	imputed	0.968727	NA	NA	NA	NA
rs7905514	111451140	0.424765	imputed	0.960202	NA	NA	NA	NA
rs10749010	111451913	0.403911	imputed	0.966872	NA	NA	NA	NA
rs10736203	111452114	0.287722	imputed	0.989979	NA	NA	NA	NA
rs10749011	111452373	0.404666	imputed	0.966519	NA	NA	NA	NA
rs10749012	111452386	0.287566	imputed	0.989817	NA	NA	NA	NA
rs10736204	111453304	0.403786	imputed	0.966122	NA	NA	NA	NA
rs1936149	111453807	0.408997	imputed	0.962945	NA	NA	NA	NA
rs10884867	111454171	0.403412	imputed	0.965659	NA	NA	NA	NA
rs10787189	111454381	0.291002	imputed	0.987302	NA	NA	NA	NA
rs12771478	111454784	0.414651	imputed	0.961835	NA	NA	NA	NA
rs10884868	111454947	0.405881	imputed	0.961483	NA	NA	NA	NA
rs11194797	111456739	0.399412	imputed	0.963722	NA	NA	NA	NA
rs11194798	111456875	0.283717	imputed	0.986835	NA	NA	NA	NA
rs11591345	111457435	0.404436	imputed	0.96043	NA	NA	NA	NA
rs4918445	111458196	0.276673	imputed	0.985034	NA	NA	NA	NA
rs1573186	111458487	0.404759	imputed	0.956136	NA	NA	NA	NA
rs1573187	111458891	0.398453	imputed	0.96251	NA	NA	NA	NA
rs1539572	111459415	0.266753	imputed	0.968861	NA	NA	NA	NA
rs7905156	111459795	0.374772	imputed	0.939881	NA	NA	NA	NA
rs6584956	111459833	0.373791	imputed	0.939299	NA	NA	NA	NA
rs4500418	111459978	0.324477	imputed	0.919473	NA	NA	NA	NA
rs2419296	111460080	0.405204	imputed	0.924428	NA	NA	NA	NA
rs2419297	111460164	0.254073	imputed	0.956893	NA	NA	NA	NA
rs4576746	111460250	0.262978	imputed	0.944523	NA	NA	NA	NA
rs10749013	111460592	0.257264	imputed	0.944694	NA	NA	NA	NA
rs78452681	111461003	0.241647	imputed	0.951689	NA	NA	NA	NA
rs10884869	111461103	0.241571	imputed	0.951747	NA	NA	NA	NA
rs11194801	111461261	0.241563	imputed	0.951744	NA	NA	NA	NA
rs10787191	111461328	0.241377	imputed	0.951709	NA	NA	NA	NA
rs7074952	111461882	0.241476	imputed	0.951734	NA	NA	NA	NA
rs7093156	111461973	0.241477	imputed	0.951732	NA	NA	NA	NA
rs7075622	111462181	0.241412	imputed	0.951728	NA	NA	NA	NA
rs6584958	111462373	0.241408	imputed	0.951728	NA	NA	NA	NA
rs7075690	111462409	0.24141	imputed	0.951727	NA	NA	NA	NA
rs7904045	111462489	0.239513	imputed	0.947198	NA	NA	NA	NA
rs7920869	111462867	0.242259	imputed	0.951636	NA	NA	NA	NA
rs7904247	111462911	0.242257	imputed	0.951633	NA	NA	NA	NA
rs10884870	111462977	0.242254	imputed	0.951632	NA	NA	NA	NA
rs10787192	111463010	0.242233	imputed	0.951631	NA	NA	NA	NA
rs10884871	111463023	0.242235	imputed	0.95163	NA	NA	NA	NA
rs7905108	111463252	0.242214	imputed	0.951617	NA	NA	NA	NA
rs10884872	111463671	0.242178	imputed	0.951607	NA	NA	NA	NA
rs10787193	111463884	0.242192	imputed	0.951602	NA	NA	NA	NA
rs10787194	111464056	0.244839	imputed	0.94069	NA	NA	NA	NA
rs10884873	111464359	0.242151	imputed	0.951589	NA	NA	NA	NA
rs11194805	111464413	0.242148	imputed	0.951587	NA	NA	NA	NA
rs11194806	111464592	0.243902	imputed	0.951335	NA	NA	NA	NA
rs10884874	111464666	0.253046	imputed	0.950724	NA	NA	NA	NA
rs10884875	111464778	0.242213	imputed	0.951578	NA	NA	NA	NA
rs1539577	111465119	0.241828	imputed	0.951408	NA	NA	NA	NA
rs1539576	111465128	0.241808	imputed	0.951402	NA	NA	NA	NA
rs4338465	111465234	0.241831	imputed	0.951363	NA	NA	NA	NA
rs10884876	111465729	0.342486	imputed	0.922816	NA	NA	NA	NA
rs10787195	111466056	0.237172	imputed	0.939333	NA	NA	NA	NA
rs10787196	111466077	0.233827	imputed	0.945433	NA	NA	NA	NA
rs10787197	111466277	0.216279	imputed	0.934818	NA	NA	NA	NA
rs10787198	111466410	0.211576	imputed	0.932667	NA	NA	NA	NA
rs1539575	111466617	0.215572	imputed	0.92311	NA	NA	NA	NA
rs1539574	111466671	0.211462	imputed	0.932585	NA	NA	NA	NA
rs1539573	111466798	0.210633	imputed	0.932172	NA	NA	NA	NA
rs10787199	111467149	0.211448	imputed	0.932578	NA	NA	NA	NA
rs10787200	111467526	0.211466	imputed	0.932576	NA	NA	NA	NA
rs10787201	111467609	0.211454	imputed	0.932576	NA	NA	NA	NA
rs10787202	111468168	0.211453	imputed	0.932568	NA	NA	NA	NA
rs10787203	111468170	0.211452	imputed	0.932569	NA	NA	NA	NA
rs10787204	111468220	0.211447	imputed	0.932569	NA	NA	NA	NA
rs1936134	111468406	0.203478	imputed	0.932355	NA	NA	NA	NA
rs10787205	111468531	0.211446	imputed	0.932569	NA	NA	NA	NA
rs10787206	111468576	0.21144	imputed	0.932568	NA	NA	NA	NA
rs10884877	111468615	0.31572	imputed	0.909564	NA	NA	NA	NA
rs1936133	111468687	0.203296	imputed	0.932338	NA	NA	NA	NA
rs10749014	111468887	0.211415	imputed	0.932567	NA	NA	NA	NA
rs10749015	111469106	0.211411	imputed	0.932562	NA	NA	NA	NA
rs10749016	111469215	0.211401	imputed	0.93256	NA	NA	NA	NA
rs10749017	111469307	0.211397	imputed	0.932558	NA	NA	NA	NA
rs10749018	111469328	0.211393	imputed	0.932558	NA	NA	NA	NA
rs61883883	111469556	0.426672	imputed	0.901628	NA	NA	NA	NA
rs10884878	111469646	0.209908	imputed	0.930958	NA	NA	NA	NA
rs10884879	111469694	0.210025	imputed	0.931042	NA	NA	NA	NA
rs10884880	111469739	0.210022	imputed	0.931042	NA	NA	NA	NA
rs10884881	111469799	0.210023	imputed	0.931041	NA	NA	NA	NA
rs10884882	111470101	0.209985	imputed	0.931034	NA	NA	NA	NA
rs10884883	111470279	0.211314	imputed	0.932525	NA	NA	NA	NA
rs12241796	111470354	0.211286	imputed	0.932484	NA	NA	NA	NA
rs11194809	111470426	0.211212	imputed	0.932472	NA	NA	NA	NA
rs10884884	111470429	0.211207	imputed	0.932472	NA	NA	NA	NA
rs10884885	111470449	0.171678	imputed	0.920707	NA	NA	NA	NA
rs10884886	111470484	0.211217	imputed	0.932486	NA	NA	NA	NA
rs10884887	111470566	0.210899	imputed	0.93241	NA	NA	NA	NA
rs11194810	111470996	0.316235	imputed	0.909039	NA	NA	NA	NA
rs11194811	111471082	0.22179	imputed	0.929008	NA	NA	NA	NA
rs10884888	111471112	0.221656	imputed	0.929239	NA	NA	NA	NA
rs10884889	111471126	0.221626	imputed	0.92924	NA	NA	NA	NA
rs1936131	111471330	0.220819	imputed	0.928918	NA	NA	NA	NA
rs1936130	111471378	0.220635	imputed	0.928884	NA	NA	NA	NA
rs4918447	111471977	0.214787	imputed	0.920504	NA	NA	NA	NA
rs1936128	111472279	0.197007	imputed	0.914892	NA	NA	NA	NA
rs10884891	111472711	0.302996	imputed	0.905562	NA	NA	NA	NA
rs10884892	111473199	0.303468	imputed	0.905311	NA	NA	NA	NA
rs10884893	111473404	0.303089	imputed	0.90526	NA	NA	NA	NA
rs1317927	111473900	0.299575	imputed	0.902705	NA	NA	NA	NA
rs11194814	111475199	0.200835	imputed	0.921695	NA	NA	NA	NA
rs10787207	111482113	0.293252	imputed	0.903982	NA	NA	NA	NA
rs10787208	111482930	0.303596	imputed	0.903767	NA	NA	NA	NA
rs10787209	111483169	0.303265	imputed	0.903765	NA	NA	NA	NA
rs4918448	111483225	0.281552	imputed	0.906941	NA	NA	NA	NA
rs1936123	111483323	0.27411	imputed	0.90147	NA	NA	NA	NA
rs1936122	111483602	0.281777	imputed	0.906932	NA	NA	NA	NA
rs10884895	111483939	0.30235	imputed	0.903759	NA	NA	NA	NA
rs10884896	111484071	0.302406	imputed	0.90375	NA	NA	NA	NA
rs2419295	111484209	0.28108	imputed	0.906926	NA	NA	NA	NA
rs11194824	111484709	0.30367	imputed	0.903435	NA	NA	NA	NA
rs12573266	111485277	0.19134	imputed	0.92493	NA	NA	NA	NA
rs11194826	111485427	0.296318	imputed	0.905974	NA	NA	NA	NA
rs11194827	111485494	0.296304	imputed	0.905974	NA	NA	NA	NA
rs11194828	111485716	0.296134	imputed	0.905983	NA	NA	NA	NA
rs11194829	111485720	0.29611	imputed	0.905984	NA	NA	NA	NA
rs11194830	111486335	0.295519	imputed	0.906007	NA	NA	NA	NA
rs1936121	111486648	0.284123	imputed	0.907071	NA	NA	NA	NA
rs1936120	111486696	0.284011	imputed	0.90708	NA	NA	NA	NA
rs1936119	111486776	0.283916	imputed	0.907078	NA	NA	NA	NA
rs1936118	111487046	0.283703	imputed	0.907083	NA	NA	NA	NA
rs2419294	111487780	0.274878	imputed	0.901349	NA	NA	NA	NA
rs2419293	111487844	0.278998	imputed	0.90577	NA	NA	NA	NA
rs2154016	111488030	0.195113	imputed	0.92631	NA	NA	NA	NA
rs2419292	111488700	0.19486	imputed	0.925478	NA	NA	NA	NA
rs2185906	111489461	0.227306	imputed	0.911884	NA	NA	NA	NA
rs2900862	111489988	0.284884	imputed	0.908454	NA	NA	NA	NA
rs10884900	111490075	0.288584	imputed	0.908603	NA	NA	NA	NA
rs7477353	111490122	0.284439	imputed	0.90983	NA	NA	NA	NA
rs2419291	111490275	0.288405	imputed	0.908667	NA	NA	NA	NA
rs2185905	111490351	0.288423	imputed	0.908685	NA	NA	NA	NA
rs17798334	111490480	0.288184	imputed	0.908706	NA	NA	NA	NA
rs7918365	111490617	0.288087	imputed	0.908727	NA	NA	NA	NA
rs10884901	111490971	0.309219	imputed	0.903878	NA	NA	NA	NA
rs4918449	111491669	0.189087	imputed	0.927162	NA	NA	NA	NA
rs11194831	111491832	0.295265	imputed	0.908329	NA	NA	NA	NA
rs11194832	111492159	0.294862	imputed	0.908379	NA	NA	NA	NA
rs1891746	111492637	0.110177	imputed	0.931206	NA	NA	NA	NA
rs7098037	111493194	0.0875024	imputed	0.97377	NA	NA	NA	NA
rs4918450	111493331	0.0864128	imputed	0.977378	NA	NA	NA	NA
rs4918451	111493418	0.0849757	imputed	0.96041	NA	NA	NA	NA
rs1936117	111493460	0.0851111	imputed	0.981127	NA	NA	NA	NA
rs11194834	111493681	0.0914861	imputed	0.972526	NA	NA	NA	NA
rs4554803	111493872	0.0501508	imputed	0.985934	NA	NA	NA	NA
rs12414665	111493987	0.0850708	imputed	0.981126	NA	NA	NA	NA
rs4918452	111494663	0.0851865	imputed	0.981432	NA	NA	NA	NA
rs10884904	111495385	0.091515	imputed	0.972827	NA	NA	NA	NA
rs4918453	111495699	0.0851202	imputed	0.981619	NA	NA	NA	NA
rs4918454	111495943	0.0851918	imputed	0.980594	NA	NA	NA	NA
rs1891745	111496824	0.085145	imputed	0.981408	NA	NA	NA	NA
rs1891744	111496979	0.0851833	imputed	0.981329	NA	NA	NA	NA
rs2419290	111497178	0.0851807	imputed	0.9811	NA	NA	NA	NA
rs4918455	111497330	0.0851153	imputed	0.980719	NA	NA	NA	NA
rs7069632	111497879	0.0419518	imputed	0.926692	NA	NA	NA	NA
rs7069768	111497983	0.0857616	imputed	0.979068	NA	NA	NA	NA
rs4918456	111498542	0.0866608	imputed	0.977498	NA	NA	NA	NA
rs4917541	111498581	0.086276	imputed	0.977791	NA	NA	NA	NA
rs10884905	111499053	0.094174	imputed	0.970228	NA	NA	NA	NA
rs2154015	111499163	0.0868864	imputed	0.959509	NA	NA	NA	NA
rs2154013	111499388	0.0853745	imputed	0.957818	NA	NA	NA	NA
rs2000274	111499623	0.0873455	imputed	0.958956	NA	NA	NA	NA
rs2000273	111499867	0.0876419	imputed	0.958684	NA	NA	NA	NA
rs2419303	111500011	0.0879079	imputed	0.95852	NA	NA	NA	NA
rs2154012	111500499	0.0884945	imputed	0.958189	NA	NA	NA	NA
rs2154011	111500571	0.0884194	imputed	0.957952	NA	NA	NA	NA
rs2419304	111500900	0.0901068	imputed	0.957344	NA	NA	NA	NA
rs10787212	111501026	0.0979417	imputed	0.951417	NA	NA	NA	NA
rs10787213	111501039	0.0980995	imputed	0.948958	NA	NA	NA	NA
rs2419305	111501067	0.0901732	imputed	0.953906	NA	NA	NA	NA
rs4917542	111501232	0.0904234	imputed	0.95687	NA	NA	NA	NA
rs4917543	111501323	0.0905785	imputed	0.956983	NA	NA	NA	NA
rs60805718	111501615	0.0494444	imputed	0.901871	NA	NA	NA	NA
rs7097152	111501825	0.091166	imputed	0.953417	NA	NA	NA	NA
rs7081809	111502084	0.0922277	imputed	0.952685	NA	NA	NA	NA
rs12767383	111502210	0.0952389	imputed	0.905921	NA	NA	NA	NA
rs1954404	111502338	0.0588402	imputed	0.969569	NA	NA	NA	NA
rs1954403	111502428	0.106333	imputed	0.914507	NA	NA	NA	NA
rs7902351	111504691	0.115205	imputed	0.928177	NA	NA	NA	NA
rs10884906	111505198	0.113314	imputed	0.930313	NA	NA	NA	NA
rs1245928	111517109	0.0740463	imputed	0.900993	NA	NA	NA	NA
rs1245930	111518218	0.11652	imputed	0.907411	NA	NA	NA	NA
rs1777751	111519822	0.138303	imputed	0.928613	NA	NA	NA	NA
rs1245935	111521272	0.0865592	imputed	0.90602	NA	NA	NA	NA
rs941863	111522478	0.141421	imputed	0.92496	NA	NA	NA	NA
rs1245936	111523092	0.0998876	imputed	0.917803	NA	NA	NA	NA
rs2475282	111523728	0.168601	imputed	0.909456	NA	NA	NA	NA
rs2488930	111523759	0.160454	imputed	0.942118	NA	NA	NA	NA
rs2475283	111523772	0.18546	imputed	0.90596	NA	NA	NA	NA
rs2475284	111524042	0.17747	imputed	0.905747	NA	NA	NA	NA
rs2488931	111524050	0.177607	imputed	0.905765	NA	NA	NA	NA
rs2244680	111524203	0.175585	imputed	0.905299	NA	NA	NA	NA
rs2244670	111524436	0.135044	imputed	0.91554	NA	NA	NA	NA
rs1777744	111525371	0.0839646	imputed	0.975696	NA	NA	NA	NA
rs1777745	111525804	0.137607	imputed	0.961134	NA	NA	NA	NA
rs2419310	111526007	0.15888	imputed	0.923951	NA	NA	NA	NA
rs1314612	111527971	0.0933939	imputed	0.988503	NA	NA	NA	NA
rs74157085	111528008	0.610425	imputed	0.914421	NA	NA	NA	NA
rs1245906	111528415	0.150625	imputed	0.984304	NA	NA	NA	NA
rs10884907	111530413	0.330446	imputed	0.968284	NA	NA	NA	NA
rs1268466	111530554	0.315406	imputed	0.960789	NA	NA	NA	NA
rs1245910	111532917	0.287826	imputed	0.97449	NA	NA	NA	4.5e-05
rs1245911	111533009	0.190851	imputed	0.949453	NA	NA	NA	NA
rs1245912	111533084	0.288111	imputed	0.974553	NA	NA	NA	4.3e-05
rs1853189	111533166	0.287596	imputed	0.974401	NA	NA	NA	2.2e-05
rs11194845	111533445	0.36393	imputed	0.994558	NA	NA	NA	NA
rs11194846	111533492	0.767677	imputed	0.945162	NA	NA	NA	NA
rs11194847	111534005	0.448539	imputed	0.979887	NA	NA	NA	NA
rs80325290	111534291	0.373224	imputed	0.998414	NA	NA	NA	NA
rs1245913	111535022	0.286961	imputed	0.974446	NA	NA	NA	4.5e-05
rs1245914	111535359	0.287151	imputed	0.974282	NA	NA	NA	2e-05
rs1245915	111535550	0.287096	imputed	0.974248	NA	NA	NA	2.2e-05
rs1245916	111535667	0.287419	imputed	0.974386	NA	NA	NA	4.3e-05
rs12414503	111535707	0.449239	imputed	0.979283	NA	NA	NA	NA
rs1245917	111535953	0.292726	imputed	0.972157	NA	NA	NA	2.2e-05
rs1777746	111536020	0.286936	imputed	0.974285	NA	NA	NA	4.5e-05
rs1777747	111536023	0.187484	imputed	0.953504	NA	NA	NA	NA
rs1245918	111536270	0.0271939	imputed	0.990944	NA	NA	NA	NA
rs10884908	111536938	0.199947	imputed	0.947794	NA	NA	NA	NA
rs10787214	111537373	0.166298	imputed	0.950848	NA	NA	NA	NA
rs10787215	111537472	0.127328	imputed	0.961258	NA	NA	NA	NA
rs10884909	111537485	0.778662	imputed	0.93926	NA	NA	NA	NA
rs7091635	111537595	0.197297	imputed	0.948258	NA	NA	NA	NA
rs11194850	111537637	0.197275	imputed	0.948251	NA	NA	NA	NA
rs17810495	111538799	0.458266	imputed	0.973015	NA	NA	NA	NA
rs10749021	111539154	0.197478	imputed	0.947759	NA	NA	NA	NA
rs12242495	111539371	0.784835	imputed	0.937314	NA	NA	NA	NA
rs4917544	111539610	0.280538	imputed	0.968484	NA	NA	NA	NA
rs74625234	111540500	0.981822	imputed	0.948746	NA	NA	NA	NA
rs11194851	111540853	0.462457	imputed	0.970119	NA	NA	NA	NA
rs10787216	111541992	0.297166	imputed	0.965169	NA	NA	NA	9.7e-05
rs12267075	111542117	0.788076	imputed	0.935971	NA	NA	NA	NA
rs12244545	111542317	0.791717	imputed	0.935217	NA	NA	NA	NA
rs72826111	111542431	0.0171773	imputed	0.981212	NA	NA	NA	NA
rs2419311	111542533	0.280704	imputed	0.988223	NA	NA	NA	NA
rs1322068	111543292	0.466931	imputed	0.96845	NA	NA	NA	NA
rs2145940	111543670	0.279757	imputed	0.988186	NA	NA	NA	NA
rs1322069	111544033	0.215376	imputed	0.940412	NA	NA	0.0001	NA
rs1322070	111544291	0.466792	imputed	0.968309	NA	NA	NA	NA
rs12243637	111544960	0.467483	imputed	0.968221	NA	NA	NA	NA
rs10884910	111545053	0.215165	imputed	0.940268	NA	NA	NA	NA
rs77550310	111545110	0.983432	imputed	0.948599	NA	NA	NA	NA
rs2093405	111545653	0.0382777	imputed	0.967079	NA	NA	NA	NA
rs12245705	111545733	0.787883	imputed	0.933562	NA	NA	NA	NA
rs1322071	111546268	0.96484	imputed	0.954752	NA	NA	NA	NA
rs4918460	111546303	0.788101	imputed	0.933465	NA	NA	NA	NA
rs661846	111547125	0.203241	imputed	0.942051	NA	NA	NA	NA
rs11194852	111547360	0.275455	imputed	0.986981	NA	NA	NA	NA
rs72826122	111547514	0.777133	imputed	0.930221	NA	NA	NA	NA
rs1322072	111547751	0.326398	imputed	0.978371	NA	NA	NA	NA
rs4918461	111548331	0.26751	imputed	0.983135	NA	NA	NA	NA
rs563734	111548340	0.0378462	imputed	0.967121	NA	NA	NA	NA
rs1322073	111549021	0.778486	imputed	0.929829	NA	NA	NA	NA
rs483685	111549396	0.0377788	imputed	0.967011	NA	NA	NA	NA
rs11194854	111549864	0.274991	imputed	0.98675	NA	NA	NA	NA
rs626198	111550272	0.141658	imputed	0.935015	NA	NA	6.2e-05	NA
rs72826125	111550547	0.459796	imputed	0.963177	NA	NA	NA	NA
rs4918462	111550795	0.460667	imputed	0.96308	NA	NA	NA	NA
rs74777858	111551227	0.26868	imputed	0.983258	NA	NA	NA	NA
rs72826129	111551989	0.465198	imputed	0.959776	NA	NA	NA	NA
rs11194857	111552500	0.780981	imputed	0.928714	NA	NA	NA	NA
rs577216	111552684	0.040884	imputed	0.94705	NA	NA	NA	NA
rs12260701	111552967	0.461276	imputed	0.962199	NA	NA	NA	NA
rs117454853	111553600	0.781891	imputed	0.928334	NA	NA	NA	NA
rs4917545	111554322	0.449084	imputed	0.956163	NA	NA	NA	NA
rs7913707	111555359	0.213489	imputed	0.932686	NA	NA	NA	NA
rs145119707	111557317	0.79127	imputed	0.919314	NA	NA	NA	NA
rs145745400	111558051	0.46931	imputed	0.903383	NA	NA	NA	NA
rs151036954	111558933	0.464302	imputed	0.949638	NA	NA	NA	NA
rs147094227	111559994	0.263902	imputed	0.95313	NA	NA	NA	NA
rs138426223	111560058	0.26384	imputed	0.953125	NA	NA	NA	NA
rs11194859	111560238	0.980336	imputed	0.941252	NA	NA	NA	NA
rs115374789	111560578	0.97996	imputed	0.941237	NA	NA	NA	NA
rs7393461	111560766	0.484955	imputed	0.951482	NA	NA	NA	NA
rs189336382	111560939	0.95144	imputed	0.94394	NA	NA	NA	NA
rs1245866	111560963	0.028747	imputed	0.930552	NA	NA	NA	NA
rs7393464	111561009	0.480709	imputed	0.952464	NA	NA	NA	NA
rs150773889	111561020	0.243498	imputed	0.966029	NA	NA	NA	NA
rs11194861	111561178	0.38003	imputed	0.946782	NA	NA	NA	NA
rs635131	111561385	0.0136321	imputed	0.971051	NA	NA	NA	NA
rs76620713	111561672	0.0303988	imputed	0.960377	NA	NA	NA	NA
rs11194862	111562203	0.481997	imputed	0.952006	NA	NA	NA	NA
rs144612078	111562541	0.210902	imputed	0.944879	NA	NA	NA	NA
rs11194863	111562568	0.810844	imputed	0.920787	NA	NA	NA	NA
rs528522	111562685	0.0304719	imputed	0.959986	NA	NA	NA	NA
rs11194864	111562870	0.983954	imputed	0.939788	NA	NA	NA	NA
rs12255744	111562900	0.482625	imputed	0.951476	NA	NA	NA	NA
rs12255815	111563051	0.813094	imputed	0.919855	NA	NA	NA	NA
rs558849	111563721	0.221681	imputed	0.930564	NA	NA	6.4e-05	NA
rs2104149	111564014	0.846171	imputed	0.913495	NA	NA	NA	NA
rs4918467	111564698	0.848858	imputed	0.914423	NA	NA	NA	NA
rs12247746	111566385	0.516677	imputed	0.943801	NA	NA	NA	NA
rs11194865	111567065	0.820564	imputed	0.916767	NA	NA	NA	NA
rs9420064	111568262	0.19483	imputed	0.91604	NA	NA	NA	NA
rs1575239	111568354	0.241601	imputed	0.981978	NA	NA	NA	NA
rs11194869	111568521	0.858657	imputed	0.91057	NA	NA	NA	NA
rs11194870	111568559	0.858994	imputed	0.910512	NA	NA	NA	NA
rs10884912	111568807	0.240732	imputed	0.981601	NA	NA	NA	NA
rs79561529	111569384	0.240642	imputed	0.981912	NA	NA	NA	NA
rs117462589	111569563	0.861336	imputed	0.90964	NA	NA	NA	NA
rs12255921	111570210	0.526492	imputed	0.937805	NA	NA	NA	NA
rs3962280	111570422	0.863346	imputed	0.909077	NA	NA	NA	NA
rs678758	111570442	0.019906	imputed	0.926394	NA	NA	NA	NA
rs678801	111570466	0.190093	imputed	0.900525	NA	NA	NA	NA
rs7076065	111571012	0.498883	imputed	0.941841	NA	NA	NA	NA
rs7075847	111571136	0.864036	imputed	0.908613	NA	NA	NA	NA
rs7075848	111571138	0.885811	imputed	0.905228	NA	NA	NA	NA
rs12265800	111571428	0.864838	imputed	0.908416	NA	NA	NA	NA
rs1931233	111571511	0.239289	imputed	0.981956	NA	NA	NA	NA
rs12256342	111571555	0.527378	imputed	0.93719	NA	NA	NA	NA
rs10884913	111578683	0.260502	imputed	0.981434	NA	NA	NA	NA
rs72826153	111579107	0.566778	imputed	0.934259	NA	NA	NA	NA
rs11194872	111579687	0.90746	imputed	0.905772	NA	NA	NA	NA
rs11194873	111579787	0.909566	imputed	0.905052	NA	NA	NA	NA
rs2483669	111579872	0.0223062	imputed	0.914328	NA	NA	NA	NA
rs7917299	111579895	0.944106	imputed	0.942726	NA	NA	NA	NA
rs11194874	111579922	0.908053	imputed	0.905448	NA	NA	NA	NA
rs7094095	111580285	0.258468	imputed	0.9816	NA	NA	NA	NA
rs654744	111580580	0.0214092	imputed	0.912956	NA	NA	NA	NA
rs1407311	111580755	0.586814	imputed	0.925656	NA	NA	NA	NA
rs72826158	111581190	0.589464	imputed	0.924735	NA	NA	NA	NA
rs507319	111581612	0.0268637	imputed	0.938491	NA	NA	NA	NA
rs12243803	111581982	0.919927	imputed	0.938043	NA	NA	NA	NA
rs747270	111581994	0.590045	imputed	0.924632	NA	NA	NA	NA
rs11194876	111582500	0.245005	imputed	0.980003	NA	NA	NA	NA
rs11194879	111582927	0.234127	imputed	0.945762	NA	NA	NA	NA
rs11194880	111583122	0.2471	imputed	0.985938	NA	NA	NA	NA
rs602449	111583696	0.0148314	imputed	0.925369	NA	NA	NA	NA
rs605196	111584337	0.0282043	imputed	0.917613	NA	NA	NA	NA
rs78542949	111584412	0.237712	imputed	0.986192	NA	NA	NA	NA
rs17738252	111584544	0.656271	imputed	0.912194	NA	NA	NA	NA
rs513221	111585102	0.0143021	imputed	0.928128	NA	NA	NA	NA
rs1407313	111585159	0.665323	imputed	0.910724	NA	NA	NA	NA
rs1407314	111585339	0.666597	imputed	0.910521	NA	NA	NA	NA
rs7901662	111585360	0.883355	imputed	0.942367	NA	NA	NA	NA
rs7920156	111585800	0.202416	imputed	0.96889	NA	NA	NA	NA
rs1760612	111585854	0.00613657	imputed	0.918642	NA	NA	NA	NA
rs7920551	111586072	0.0166171	imputed	0.904128	NA	NA	NA	NA
rs190810694	111586635	0.836405	imputed	0.94946	NA	NA	NA	NA
rs183043024	111586636	0.149163	imputed	0.963075	NA	NA	NA	NA
rs193076040	111589982	0.578911	imputed	0.908941	NA	NA	NA	NA
rs12412721	111590949	0.665128	imputed	0.912364	NA	NA	NA	NA
rs28884170	111591156	0.220621	imputed	0.993549	NA	NA	NA	NA
rs139022222	111591366	0.673393	imputed	0.911617	NA	NA	NA	NA
rs150185664	111591458	0.66598	imputed	0.910641	NA	NA	NA	NA
rs542860	111591725	0.0192836	imputed	0.910238	NA	NA	NA	NA
rs10509904	111591769	0.708676	imputed	0.902144	NA	NA	NA	NA
rs540258	111591977	0.0192351	imputed	0.910206	NA	NA	NA	NA
rs79972981	111592158	0.807019	imputed	0.954438	NA	NA	NA	NA
rs506328	111593408	0.018837	imputed	0.909108	NA	NA	NA	NA
rs72477618	111593426	0.219397	imputed	0.986264	NA	NA	NA	NA
rs479440	111594014	0.00512433	imputed	0.926331	NA	NA	NA	NA
rs11194887	111594616	0.80002	imputed	0.952318	NA	NA	NA	NA
rs559735	111594986	0.00489976	imputed	0.926689	NA	NA	NA	NA
rs10509905	111595768	0.218907	imputed	0.979196	NA	NA	NA	NA
rs17126813	111596945	0.205685	imputed	0.976749	NA	NA	NA	NA
rs626134	111598029	0.142358	imputed	0.900035	NA	NA	NA	NA
rs2181044	111599041	0.202043	imputed	0.976975	NA	NA	NA	NA
rs2145941	111599149	0.202101	imputed	0.97699	NA	NA	NA	NA
rs72477619	111599746	0.142164	imputed	0.948212	NA	NA	NA	NA
rs73355595	111600775	0.127175	imputed	0.986513	NA	NA	NA	NA
rs142246403	111600889	0.675016	imputed	0.956918	NA	NA	NA	NA
rs11194889	111602008	0.128234	imputed	0.988106	NA	NA	NA	NA
rs58986055	111602859	0.131426	imputed	0.989493	NA	NA	NA	NA
rs7093891	111603031	0.131547	imputed	0.989742	NA	NA	NA	NA
rs6584959	111603719	0.13159	imputed	0.989869	NA	NA	NA	NA
rs473403	111604046	0.00616655	imputed	0.948927	NA	NA	NA	NA
rs73357411	111604604	0.135248	imputed	0.994131	NA	NA	NA	NA
rs17126823	111605392	0.136071	imputed	0.995549	NA	NA	NA	NA
rs76541340	111605681	0.133534	imputed	0.992961	NA	NA	NA	NA
rs7074626	111606093	0.1357	imputed	0.995266	NA	NA	NA	NA
rs73357417	111606398	0.708848	imputed	0.959105	NA	NA	NA	NA
rs654796	111606516	0.138022	imputed	0.941712	NA	NA	NA	NA
rs944965	111607894	0.191656	imputed	0.961117	NA	NA	NA	NA
rs7908294	111608093	0.160046	imputed	0.959256	NA	NA	NA	NA
rs6584960	111608242	0.180809	imputed	0.962524	NA	NA	NA	NA
rs944964	111608455	0.184685	imputed	0.963728	NA	NA	NA	NA
rs685242	111608677	0.13219	imputed	0.945395	NA	NA	NA	NA
rs10884915	111609160	0.128163	imputed	0.953888	NA	NA	NA	NA
rs12569662	111609452	0.00235612	imputed	0.977289	NA	NA	NA	NA
rs28677155	111610442	0.00389155	imputed	0.998008	NA	NA	NA	NA
rs111302144	111610588	0.00387584	imputed	0.997614	NA	NA	NA	NA
rs112969382	111610606	0.00387984	imputed	0.99756	NA	NA	NA	NA
rs7918523	111611584	0.00409155	imputed	0.988798	NA	NA	NA	NA
rs4543916	111611808	0.00456166	imputed	0.985638	NA	NA	NA	NA
rs7918778	111611835	0.00450602	imputed	0.983354	NA	NA	NA	NA
rs7902806	111612285	0.00413913	imputed	0.986233	NA	NA	NA	NA
rs7902911	111612350	0.00408375	imputed	0.985661	NA	NA	NA	NA
rs11194893	111612577	0.00402269	imputed	0.986169	NA	NA	NA	NA
rs4606415	111613068	0.00410474	imputed	0.98386	NA	NA	NA	NA
rs75929559	111613163	0.769359	imputed	0.953363	NA	NA	NA	NA
rs12249715	111614536	0.00385396	imputed	0.972341	NA	NA	NA	NA
rs67701529	111614843	0.179958	imputed	0.97367	NA	NA	1.9e-05	NA
rs59984897	111615035	0.00378987	imputed	0.973091	NA	NA	NA	NA
rs11194896	111615044	0.145168	imputed	0.94818	NA	NA	8.7e-05	NA
rs34512391	111616174	0.00319552	imputed	0.968499	NA	NA	NA	NA
rs11194897	111617024	0.265965	imputed	0.958045	NA	NA	NA	NA
rs34352553	111617814	0.00304977	imputed	0.95751	NA	NA	NA	NA
rs72826186	111618821	0.00306057	imputed	0.939356	NA	NA	NA	NA
rs648961	111619759	0.180852	imputed	0.967053	NA	NA	NA	NA
rs10787217	111621103	0.0536775	imputed	0.908608	NA	NA	NA	NA
rs10787218	111621456	0.0777035	imputed	0.902611	NA	NA	NA	NA
rs492943	111629030	0.0545586	imputed	0.914214	NA	NA	NA	NA
rs612155	111630731	0.17043	imputed	0.908661	NA	NA	NA	NA
rs552419	111630883	0.139737	imputed	0.907999	NA	NA	NA	NA
rs3740137	111630917	0.0514631	imputed	0.921545	NA	NA	NA	NA
rs3740138	111630931	0.0552053	imputed	0.924459	NA	NA	NA	NA
rs7075964	111631265	0.000911938	imputed	0.989197	NA	NA	3e-06	6.8e-05
rs2274978	111631665	0.000980624	imputed	0.992963	NA	NA	5.8e-06	0.00011
rs7916801	111632445	0.000906058	imputed	0.984976	NA	NA	5.8e-06	0.00011
rs536343	111632879	0.173967	imputed	0.909336	NA	NA	NA	NA
rs3740140	111632937	0.000858229	imputed	0.98027	NA	NA	5.8e-06	0.00012
rs642938	111633025	0.174619	imputed	0.909115	NA	NA	NA	NA
rs58154613	111633966	0.000718397	imputed	0.970706	NA	NA	5.8e-06	0.00012
rs2475275	111633979	0.172358	imputed	0.903291	NA	NA	NA	NA
rs58719275	111634568	0.00070084	imputed	0.969567	NA	NA	5.8e-06	0.00011
rs41291880	111635785	0.000740789	imputed	0.969954	NA	NA	3.7e-06	0.00019
rs2273740	111637635	0.00149821	imputed	0.935413	NA	NA	2.1e-05	NA
rs4918469	111639314	0.0315672	imputed	0.91704	NA	NA	NA	NA
rs3780950	111641706	0.000680302	imputed	0.956427	NA	NA	4.4e-07	3.7e-05
rs35712139	111642934	0.0344076	imputed	0.915243	NA	NA	NA	NA
rs35420248	111643074	0.0350271	imputed	0.916262	NA	NA	NA	NA
rs3780951	111644994	0.000651755	imputed	0.944236	NA	NA	1.5e-07	5.9e-05
rs3824623	111645313	0.000616712	imputed	0.94224	NA	NA	2.5e-07	6.7e-05
rs2273738	111648659	3.39301e-07	imputed	0.936309	NA	NA	6.7e-10	1.3e-07
rs72828203	111649343	4.35694e-07	imputed	0.95097	NA	NA	7.4e-11	1.7e-07
rs3780952	111650629	0.000604144	imputed	0.956681	NA	NA	1.7e-05	0.00012
rs3780953	111650634	4.07472e-07	imputed	0.958312	NA	NA	7.4e-11	1.7e-07
rs1973972	111651133	0.0328501	imputed	0.986753	NA	NA	NA	NA
rs4917547	111652285	0.0280644	imputed	0.98144	NA	NA	NA	NA
rs3737153	111652610	0.00071766	imputed	0.967858	NA	NA	1.5e-05	0.00011
rs10399964	111654109	2.33408e-07	imputed	0.962846	NA	NA	9.4e-11	1.9e-07
rs1815249	111655790	0.000301199	imputed	0.991771	NA	NA	4.6e-05	0.00014
rs941864	111656948	0.0177014	imputed	0.966354	NA	NA	NA	NA
rs944966	111658334	0.0173753	imputed	0.965705	NA	NA	NA	NA
rs10884916	111658925	0.0010291	imputed	0.958498	NA	NA	3.9e-05	4.8e-05
rs1889303	111659454	0.000289078	imputed	0.993143	NA	NA	9.8e-05	3.3e-05
rs4918471	111660500	0.0135906	imputed	0.959947	NA	NA	NA	NA
rs6584961	111662143	0.000278001	imputed	0.995842	NA	NA	3.9e-05	4.8e-05
rs7922330	111662322	0.0161757	imputed	0.964673	NA	NA	NA	NA
rs944968	111662938	0.000271133	imputed	0.996469	NA	NA	3.9e-05	4.8e-05
rs11194907	111663943	0.000272483	imputed	0.99784	NA	NA	3.9e-05	4.8e-05
rs55683820	111665376	1.74056e-08	imputed	0.95828	NA	NA	1.9e-11	3.1e-08
rs55717725	111666629	2.0735e-08	imputed	0.962758	NA	5.7e-05	2.1e-13	1.3e-10
rs944969	111667664	0.000284405	imputed	0.996735	NA	NA	9.8e-05	2.8e-05
rs3758409	111669239	0.00898067	imputed	0.960931	NA	NA	NA	NA
rs11194910	111670166	0.00954046	imputed	0.960751	NA	NA	NA	NA
rs55781439	111670220	2.1744e-08	imputed	0.966156	NA	NA	1.2e-13	1.5e-09
rs7899805	111671177	0.00983607	imputed	0.963522	NA	NA	NA	NA
rs7087731	111672028	0.000382886	imputed	0.993555	NA	NA	9.8e-05	2.8e-05
rs17126877	111672786	1.23253e-08	imputed	0.959297	NA	NA	1.9e-11	2.4e-08
rs12571872	111676114	1.19989e-08	imputed	0.948901	NA	NA	NA	NA
rs12258440	111676799	0.0073562	imputed	0.938668	NA	NA	NA	NA
rs10466193	111677201	0.000345357	imputed	0.989506	NA	NA	9.8e-05	2.8e-05
rs7906367	111677728	0.000274437	imputed	0.964315	NA	NA	3.5e-05	4.1e-05
rs10787220	111680388	0.000238138	imputed	0.981286	NA	NA	3.9e-05	4.1e-05
rs12416191	111680690	0.000314329	imputed	0.978205	NA	NA	9.8e-05	2.8e-05
rs2084607	111681411	0.00988847	imputed	0.952951	NA	NA	NA	NA
rs752584	111682934	8.12961e-09	imputed	0.936225	NA	NA	1.9e-11	1.6e-08
rs10884917	111684525	0.000410965	imputed	0.959735	NA	NA	2e-05	1.7e-05
rs72828218	111689199	1.76444e-10	imputed	0.966092	NA	NA	2.2e-12	5.6e-08
rs6584962	111689904	3.12814e-10	imputed	0.971999	NA	2.2e-06	3.1e-12	7.9e-08
rs12570423	111690942	2.39241e-10	imputed	0.975251	NA	2.4e-05	1.7e-13	3.9e-10
rs7921609	111691599	2.99531e-10	imputed	0.972425	NA	1.1e-05	3.3e-12	1.3e-07
rs12570230	111691614	2.53239e-10	imputed	0.976297	NA	NA	6.3e-14	7.6e-10
rs59804002	111692043	2.27832e-10	imputed	0.973449	NA	NA	1.2e-12	3.5e-10
rs11194917	111692552	2.48777e-10	imputed	0.975671	NA	NA	2.8e-13	3.3e-09
rs17126883	111694696	1.21088e-10	imputed	0.972212	NA	NA	3.5e-13	2.1e-08
rs17126886	111695257	2.03648e-10	imputed	0.979371	NA	NA	1.7e-13	6.4e-09
rs11194920	111695412	2.0733e-10	imputed	0.979404	NA	NA	8.3e-14	5.2e-09
rs11194922	111695656	4.93497e-10	imputed	0.967163	NA	NA	1.7e-13	6.5e-09
rs11194923	111695762	2.02357e-10	imputed	0.979729	NA	NA	6.3e-13	3.6e-09
rs11194924	111695773	2.01517e-10	imputed	0.97949	NA	NA	1.7e-13	6.5e-09
rs12571577	111696330	3.93494e-11	imputed	0.913072	NA	NA	8.3e-14	5.2e-09
rs12570607	111696704	5.78093e-11	imputed	0.968546	NA	NA	1.7e-13	6.4e-09
rs12263484	111697255	6.56978e-11	imputed	0.965342	NA	1.1e-05	9.3e-13	1.3e-07
rs734165	111697789	3.67152e-11	imputed	0.960717	NA	NA	1.2e-12	1.7e-08
rs734164	111698160	5.68611e-11	imputed	0.969148	NA	NA	2.1e-13	3.2e-09
rs734163	111698192	5.4161e-11	imputed	0.968885	NA	NA	3.8e-13	1.3e-08
rs17126890	111699169	6.52442e-11	imputed	0.968452	NA	NA	3e-14	6.5e-09
rs55897175	111699190	5.7112e-11	imputed	0.969739	NA	NA	1.4e-13	1.6e-08
rs12254785	111699607	5.60944e-11	imputed	0.970232	NA	NA	1.4e-13	1.6e-08
rs11194926	111700922	3.82876e-11	imputed	0.966303	NA	NA	3.4e-13	2.5e-08
rs17095350	111701708	5.26542e-11	imputed	0.970484	NA	NA	1.2e-13	2.9e-08
rs72828224	111702047	5.61131e-11	imputed	0.966095	NA	NA	3e-14	6.5e-09
rs9988702	111703389	1.83074e-10	imputed	0.967286	NA	NA	3.4e-13	2.5e-08
rs921351	111704715	4.16325e-11	imputed	0.974754	NA	NA	3.4e-13	2.4e-08
rs975442	111705895	9.32541e-11	imputed	0.981377	NA	NA	2.7e-13	2.1e-09
rs12569906	111706856	1.23935e-10	imputed	0.985127	NA	NA	3.8e-13	1.3e-08
rs1376111	111707255	1.28431e-10	imputed	0.984796	NA	NA	1.4e-13	1.6e-08
rs921348	111707498	1.17654e-10	imputed	0.98555	NA	NA	5.1e-13	8.4e-09
rs56273398	111708183	7.57239e-11	imputed	0.980522	NA	NA	5.1e-12	9.9e-10
rs7906904	111708193	1.80572e-10	imputed	0.979012	NA	1.3e-05	1.6e-12	1.3e-07
rs17126902	111710381	1.12522e-10	imputed	0.986283	NA	NA	5.1e-13	8.4e-09
rs7080576	111710817	1.14639e-10	imputed	0.984972	NA	NA	3e-14	6.6e-09
rs12257668	111711658	1.10468e-10	imputed	0.986599	NA	NA	5.1e-13	8.4e-09
rs9787456	111711822	0.000831363	imputed	0.937096	NA	NA	NA	NA
rs7905306	111712902	1.19522e-10	imputed	0.98594	NA	NA	3e-14	6.5e-09
rs12570145	111712913	4.7793e-11	imputed	0.96374	NA	NA	3.2e-10	1.4e-08
rs7085888	111713930	1.062e-10	imputed	0.987181	NA	NA	5.1e-13	8.2e-09
rs55728195	111715599	1.01757e-10	imputed	0.987574	NA	NA	5.1e-13	8.2e-09
rs731793	111716667	1.12251e-10	imputed	0.986979	NA	NA	3e-14	6.6e-09
rs4565840	111717140	1.11399e-10	imputed	0.987104	NA	NA	3e-14	6.5e-09
rs12571674	111717608	6.31855e-11	imputed	0.980587	NA	NA	1.2e-12	1.7e-08
rs12570612	111717685	1.11225e-10	imputed	0.986885	NA	NA	3e-14	6.5e-09
rs12247564	111721400	9.37472e-11	imputed	0.98932	NA	NA	5.1e-13	8.4e-09
rs12267704	111722008	9.26105e-11	imputed	0.989482	NA	NA	5.1e-13	8.4e-09
rs12267714	111722052	7.87431e-11	imputed	0.986713	NA	NA	5.1e-13	8.4e-09
rs61624875	111722489	1.0592e-10	imputed	0.987044	NA	NA	3.4e-13	1.6e-08
rs12242642	111724213	4.25975e-10	imputed	0.971433	NA	NA	5.1e-13	8.2e-09
rs12250404	111724284	9.18499e-11	imputed	0.983815	NA	NA	2.8e-13	3.3e-09
rs12259261	111725145	8.83441e-11	imputed	0.99038	NA	NA	5.1e-13	8.2e-09
rs72828232	111725298	5.64501e-11	imputed	0.983941	NA	NA	1.2e-12	1.7e-08
rs11194933	111725862	7.55898e-11	imputed	0.988755	NA	NA	3.4e-13	1.6e-08
rs12246851	111726340	6.55833e-11	imputed	0.991734	NA	NA	5.1e-13	8.4e-09
rs13377046	111729228	6.73712e-11	imputed	0.98749	NA	NA	7.7e-14	6.4e-09
rs13377169	111729414	6.89879e-11	imputed	0.990439	NA	NA	7.7e-14	6.4e-09
rs7068482	111729503	8.25152e-11	imputed	0.986526	NA	1.3e-05	1.6e-12	1.3e-07
rs7073324	111730474	8.67415e-11	imputed	0.980697	NA	NA	8.1e-13	6.9e-10
rs1571617	111732025	7.6947e-11	imputed	0.987598	NA	1.3e-05	2.2e-13	1.7e-07
rs12570820	111732507	5.82071e-11	imputed	0.993674	NA	NA	1.2e-13	3.4e-09
rs1271354	111733795	5.83509e-11	imputed	0.993489	NA	NA	8.2e-12	5.5e-08
rs111481776	111733866	3.78274e-11	imputed	0.983561	NA	NA	1.9e-10	4.9e-08
rs75063896	111733944	8.79497e-11	imputed	0.978506	NA	NA	1.5e-11	6.7e-08
rs59042914	111734169	6.90468e-11	imputed	0.985712	NA	NA	7e-13	2.5e-08
rs58096078	111734286	6.32318e-11	imputed	0.991276	NA	NA	2.2e-13	5.1e-09
rs7067604	111734665	4.81066e-11	imputed	0.989666	NA	NA	6.1e-11	1.2e-09
rs57440982	111735772	4.11224e-11	imputed	0.991327	NA	NA	8.1e-13	6.9e-10
rs9630101	111738451	6.26804e-11	imputed	0.992451	NA	NA	3.4e-13	1.6e-08
rs9630102	111738662	6.15495e-11	imputed	0.992452	NA	NA	3.4e-13	1.3e-08
rs11194940	111742223	6.17747e-11	imputed	0.987703	NA	NA	7.7e-14	5e-09
rs12240333	111743972	5.81597e-11	imputed	0.989006	NA	NA	5.1e-13	8.2e-09
rs61614979	111743994	6.14534e-11	imputed	0.987423	NA	NA	9.9e-13	2.8e-09
rs12263915	111744664	5.81027e-11	imputed	0.988937	NA	NA	5.1e-13	1.7e-09
rs72828241	111744704	4.80696e-11	imputed	0.98302	NA	NA	3.7e-11	1.3e-08
rs11194941	111744810	5.70859e-11	imputed	0.987393	NA	NA	5.1e-13	1.7e-09
rs75079039	111745121	4.47238e-11	imputed	0.978991	NA	NA	NA	NA
rs12244557	111746142	4.82087e-11	imputed	0.974356	NA	NA	5.1e-13	1.7e-09
rs71479284	111746437	0.000530676	imputed	0.921583	NA	NA	NA	NA
rs72828245	111746596	4.83781e-11	imputed	0.968796	NA	NA	9.9e-13	2.2e-09
rs2419313	111750851	7.05066e-11	imputed	0.91733	NA	NA	3.1e-11	3e-10
rs12265204	111752163	2.04407e-11	imputed	0.929111	NA	NA	2.1e-12	4.3e-10
rs958086	111752548	2.05532e-11	imputed	0.928987	NA	NA	2.1e-12	4.3e-10
rs7069789	111753183	1.73792e-11	imputed	0.926111	NA	NA	2.1e-12	4.3e-10
rs7073969	111753798	1.58292e-11	imputed	0.927165	NA	NA	1.8e-11	1.4e-08
rs17126931	111754633	1.57636e-11	imputed	0.926924	NA	NA	3.7e-11	1.3e-08
rs2122517	111754787	3.14297e-11	imputed	0.926473	NA	1.3e-06	3.7e-11	3.3e-09
rs7904096	111755319	3.15902e-11	imputed	0.926329	NA	1.3e-06	3.7e-11	3.3e-09
rs7079713	111755416	3.21174e-11	imputed	0.925708	NA	1.3e-06	3.7e-11	3.3e-09
rs7083619	111755762	3.83539e-11	imputed	0.923239	NA	6.4e-06	1.6e-12	2.7e-08
rs17126936	111757126	4.65291e-09	imputed	0.939942	NA	NA	2.5e-12	9.3e-13
rs10509906	111757674	0.000896466	imputed	0.91072	NA	NA	5.2e-07	2.5e-08
rs12569425	111758177	4.91406e-09	imputed	0.995052	NA	1.7e-05	2.5e-14	8.2e-12
rs61881586	111758419	7.88014e-09	imputed	0.987949	NA	2.6e-05	1.1e-13	1.7e-11
rs6584964	111759160	5.04025e-09	imputed	0.99405	NA	2.6e-05	1.1e-13	2.2e-11
rs61881587	111759710	4.69446e-09	imputed	0.993672	NA	1.7e-05	2.5e-14	1.2e-11
rs7069128	111760075	4.90069e-09	imputed	0.993589	NA	1.7e-05	2.5e-14	8.2e-12
rs9783184	111760499	4.75884e-09	imputed	0.992724	NA	1.7e-05	2.5e-14	8.2e-12
rs17126938	111761351	2.32667e-09	imputed	0.986718	NA	NA	4.4e-14	1.4e-13
rs11194947	111763731	4.91193e-09	imputed	0.988322	NA	1.7e-05	2.5e-14	8.2e-12
rs12572168	111764786	9.77236e-10	imputed	0.979707	NA	NA	NA	NA
rs61579832	111766275	5.38863e-09	imputed	0.97884	NA	2.6e-05	2.8e-14	1.6e-11
rs28365866	111767214	1.77069e-08	imputed	0.957317	NA	NA	2.5e-13	1.1e-11
rs7076609	111768151	4.23856e-09	imputed	0.942179	NA	1.6e-05	4.8e-15	3e-11
rs12572438	111769236	9.14535e-10	imputed	0.963951	NA	NA	2.7e-14	2.8e-11
rs12571549	111770013	1.97484e-09	imputed	0.959762	NA	NA	9.3e-16	1.4e-13
rs57239324	111770871	9.09034e-10	imputed	0.958692	NA	NA	2.7e-14	2.8e-11
rs4918475	111771165	5.40214e-09	imputed	0.957113	NA	8.3e-07	4.7e-18	7.7e-14
rs7090570	111772798	4.77587e-09	imputed	0.953006	NA	1.6e-05	1.7e-14	4.1e-11
rs11194950	111772964	4.61495e-09	imputed	0.954691	NA	1.6e-05	4.3e-14	1.1e-11
rs2060675	111773423	5.17631e-09	imputed	0.952946	NA	5.1e-07	4.9e-18	2.5e-14
rs12268462	111775047	4.27473e-09	imputed	0.953363	NA	1.6e-05	4.4e-15	3.8e-11
rs7088861	111775544	4.325e-09	imputed	0.953418	NA	1.6e-05	4.4e-15	3.8e-11
rs7071509	111775849	4.2146e-09	imputed	0.953503	NA	1.6e-05	1.7e-14	4.1e-11
rs35096721	111775907	4.21319e-09	imputed	0.953495	NA	1.6e-05	1.7e-14	4.1e-11
rs12571773	111776004	4.21132e-09	imputed	0.95348	NA	1.6e-05	4.3e-14	1.1e-11
rs11194951	111776122	5.1833e-09	imputed	0.952332	NA	5.1e-07	3.6e-19	2e-13
rs10884921	111776248	3.96307e-09	imputed	0.94813	NA	1.6e-05	4.3e-14	1.1e-11
rs10509907	111781715	8.23262e-10	imputed	0.951806	NA	NA	2.7e-14	5.5e-11
rs56367935	111783266	8.2713e-10	imputed	0.951554	NA	NA	2.7e-14	2.8e-11
rs72828263	111785703	5.05511e-10	imputed	0.931055	NA	NA	2.7e-14	2.8e-11
rs56206587	111790020	1.51006e-09	imputed	0.944152	NA	NA	1.7e-14	8.9e-12
rs1349348	111794554	6.44116e-10	imputed	0.937073	NA	NA	1e-15	8.8e-12
rs59339754	111800116	8.2928e-10	imputed	0.949105	NA	NA	3.2e-14	1.2e-11
rs4595478	111800145	4.89881e-09	imputed	0.948304	NA	5.9e-07	6.5e-19	3e-13
rs11194963	111806469	5.44358e-09	imputed	0.948241	NA	5.1e-07	6.5e-19	8.4e-14
rs61881619	111809178	8.38672e-10	imputed	0.946503	NA	NA	2.7e-14	2.8e-11
rs17126984	111812955	9.04096e-10	imputed	0.937606	NA	NA	2.7e-10	4.5e-10
rs17126985	111813038	9.02186e-10	imputed	0.937489	NA	NA	2.7e-10	4.5e-10
rs2076974	111820311	4.23656e-09	imputed	0.942752	NA	6.5e-07	4.6e-19	1.9e-13
rs2419315	111821868	4.63501e-09	imputed	0.940993	NA	1e-06	3.7e-19	6e-13
rs10884925	111822398	4.46381e-09	imputed	0.942304	NA	1e-06	3.7e-19	6e-13
rs11592785	111825518	1.25621e-09	imputed	0.911699	NA	1e-06	5.6e-19	5.6e-13
rs144674456	111831608	0.327483	imputed	0.913803	NA	NA	NA	NA
rs2481106	111832438	4.33353e-09	imputed	0.942624	NA	5.1e-07	3.6e-19	2e-13
rs10787223	111837650	0.000613644	imputed	0.955332	NA	NA	NA	NA
rs189967792	111838392	0.634293	imputed	0.930352	NA	NA	NA	NA
rs10787224	111838508	0.000695515	imputed	0.960054	NA	NA	NA	NA
rs12416636	111838523	0.00483107	imputed	0.919751	NA	NA	NA	NA
rs2501578	111838873	0.000510091	imputed	0.954804	NA	NA	7.5e-05	4.6e-05
rs3932612	111839353	0.000642076	imputed	0.982206	NA	NA	NA	9.3e-05
rs4918478	111840070	0.00600419	imputed	0.920519	NA	NA	NA	NA
rs1009532	111840725	5.02074e-09	imputed	0.934905	NA	4.2e-07	1.8e-19	5.1e-14
rs11194975	111842488	0.00346781	imputed	0.927322	NA	NA	NA	NA
rs2501577	111846687	6.4394e-09	imputed	0.932948	NA	6.8e-07	2.6e-19	1.4e-13
rs6584970	111847820	8.24977e-09	imputed	0.923485	NA	1.6e-05	4.4e-15	3.8e-11
rs2501575	111849864	5.4865e-09	imputed	0.931871	NA	4.2e-07	2.2e-19	4.7e-14
rs2150210	111852021	0.00360233	imputed	0.914108	NA	NA	NA	NA
rs2007010	111852663	0.00455373	imputed	0.92435	NA	4.7e-05	NA	NA
rs2150211	111855414	6.07368e-09	imputed	0.904413	NA	5.1e-07	3.4e-19	4.1e-13
rs12573187	111856077	1.10876e-09	imputed	0.903546	NA	NA	7e-15	3.2e-11
rs11194981	111861054	5.2803e-09	imputed	0.901467	NA	1.3e-05	1.8e-15	2.3e-11
rs61881639	111863501	9.25101e-10	imputed	0.901513	NA	NA	1.4e-13	1.1e-10
rs7086057	111867076	6.4857e-09	imputed	0.900891	NA	4.2e-07	1.6e-19	1.2e-13
rs145476776	111867222	0.0415716	imputed	0.977229	NA	NA	NA	NA
rs61881641	111871431	0.020558	imputed	0.902079	NA	NA	NA	NA
rs12261598	111872175	1.00994e-08	imputed	0.901943	NA	5.3e-07	3.7e-19	2.9e-13
rs11194988	111874092	0.00683683	imputed	0.900115	NA	NA	NA	NA
rs12268910	111878510	8.13031e-09	imputed	0.911921	NA	4.2e-07	1.6e-19	1.1e-13
rs11194997	111889779	5.69148e-10	imputed	0.902574	NA	5.1e-07	3.4e-19	4.1e-13
rs13306109	111890362	2.14052e-10	imputed	0.90127	NA	NA	3.2e-14	1.5e-10
rs192345567	111890506	0.164771	imputed	0.947091	NA	NA	NA	NA
rs140387717	111899819	0.37086	imputed	0.90159	NA	NA	NA	NA
rs4130278	111913522	2.79055e-05	imputed	0.906101	NA	NA	2.7e-12	3.5e-08
rs4607997	111917034	4.53624e-06	imputed	0.926746	NA	NA	NA	NA
rs72830404	111917778	0.889428	imputed	0.936767	NA	NA	4.8e-06	3.2e-07
rs72830406	111919220	0.844158	imputed	0.920348	NA	NA	1.3e-06	4e-07
rs72830407	111919274	0.796725	imputed	0.942487	NA	NA	1.5e-05	3.7e-05
rs7918758	111919866	9.35331e-06	imputed	0.961082	NA	NA	5.4e-14	9.4e-09
rs12260509	111920995	1.02611e-05	imputed	0.962984	NA	NA	5.1e-14	5.6e-08
rs61881651	111921283	1.16996e-05	imputed	0.91869	NA	NA	NA	NA
rs79001385	111921897	0.94762	imputed	0.963553	NA	NA	1.5e-05	3.7e-05
rs77521331	111924392	0.743688	imputed	0.954041	NA	NA	2.1e-06	4.8e-08
rs11814770	111924518	5.58279e-06	imputed	0.953107	NA	NA	NA	NA
rs112576192	111924603	0.977729	imputed	0.952195	NA	NA	2.1e-06	4.8e-08
rs12243027	111924817	9.75313e-06	imputed	0.978542	NA	NA	6.8e-14	3.2e-09
rs7076402	111925230	0.890547	imputed	0.99585	NA	NA	5.5e-06	3.3e-07
rs3890722	111925233	9.44123e-06	imputed	0.972663	NA	NA	6.2e-13	3.7e-07
rs6584973	111925636	9.03878e-06	imputed	0.979022	NA	NA	2.6e-13	5e-08
rs7080762	111925659	0.840966	imputed	0.995856	NA	NA	5.5e-06	3.3e-07
rs111373328	111926496	0.83565	imputed	0.995041	NA	NA	5.5e-06	3.3e-07
rs7909632	111926936	9.22209e-06	imputed	0.979615	NA	NA	2.2e-14	1.6e-08
rs72830418	111927603	0.720772	imputed	0.949936	NA	NA	9.2e-06	1.7e-05
rs72830420	111927667	0.838842	imputed	0.995903	NA	NA	5.5e-06	3.3e-07
rs7914613	111928068	5.87741e-06	imputed	0.96789	NA	NA	8e-05	NA
rs7095778	111929369	0.717528	imputed	0.935452	NA	NA	4e-05	3.3e-07
rs12268286	111930041	0.721036	imputed	0.92025	NA	NA	2e-05	9.4e-06
rs12268290	111930048	0.82896	imputed	0.957687	NA	NA	3.9e-05	1.7e-05
rs12268337	111930116	0.821805	imputed	0.955145	NA	NA	3.9e-05	1.7e-05
rs17127145	111930361	0.718108	imputed	0.912046	NA	NA	2e-05	1.7e-05
rs56387600	111930461	0.81945	imputed	0.948595	NA	NA	2.2e-05	1.6e-05
rs76354172	111936063	0.00213925	imputed	0.901677	NA	NA	NA	NA
rs12416245	111938114	0.769479	imputed	0.915633	NA	NA	NA	NA
rs79417500	111940433	0.034301	imputed	0.986867	NA	NA	NA	NA
rs58657490	111944406	0.0264787	imputed	0.979058	NA	NA	NA	NA
rs2050997	111944903	0.0197751	imputed	0.925371	NA	NA	NA	0.0001
rs7911875	111945350	0.0268264	imputed	0.943244	NA	NA	3e-06	7.6e-05
rs7912101	111945377	0.0168992	imputed	0.921324	NA	NA	NA	4.3e-06
rs139315440	111946207	0.0137983	imputed	0.903752	NA	NA	NA	NA
rs79404554	111946873	0.0321056	imputed	0.996341	NA	NA	NA	NA
rs4917552	111946985	0.9202	imputed	0.960054	NA	NA	NA	NA
rs1573044	111947109	0.0190867	imputed	0.921031	NA	NA	NA	0.0002
rs1573043	111947177	0.914939	imputed	0.95954	NA	NA	NA	NA
rs4918484	111948530	0.816489	imputed	0.962969	NA	NA	NA	NA
rs4918485	111949323	0.0113606	imputed	0.953296	NA	NA	NA	NA
rs7077820	111950114	0.804339	imputed	0.982844	NA	NA	NA	NA
rs72830431	111951047	0.508419	imputed	0.937648	NA	NA	NA	NA
rs4562740	111951930	0.0139107	imputed	0.966878	NA	NA	NA	NA
rs4526710	111951935	0.0104572	imputed	0.937968	NA	NA	NA	NA
rs78628483	111952079	0.188703	imputed	0.953217	NA	NA	NA	NA
rs72830432	111952176	0.514594	imputed	0.941537	NA	NA	NA	NA
rs55804151	111952528	0.131738	imputed	0.950868	NA	NA	NA	NA
rs7071207	111953763	0.0586389	imputed	0.979702	NA	NA	NA	NA
rs7071355	111953870	0.112926	imputed	0.94336	NA	NA	NA	NA
rs1541224	111954326	0.0569044	imputed	0.980922	NA	NA	NA	NA
rs7071821	111954368	0.731201	imputed	0.965997	NA	NA	NA	NA
rs6584976	111954923	0.0611703	imputed	0.986577	NA	NA	NA	NA
rs7085222	111956731	0.787415	imputed	0.937135	NA	NA	NA	NA
rs55751012	111956854	0.61709	imputed	0.951317	NA	NA	NA	NA
rs11195021	111957646	0.798146	imputed	0.941044	NA	NA	NA	NA
rs2419318	111958130	0.751811	imputed	0.927769	NA	NA	NA	NA
rs72830436	111958144	0.561058	imputed	0.9246	NA	NA	NA	NA
rs59767181	111958284	0.153276	imputed	0.925138	NA	NA	NA	NA
rs61126997	111958462	0.173299	imputed	0.920375	NA	NA	NA	NA
rs72830437	111960190	0.574277	imputed	0.907469	NA	NA	NA	NA
rs113440680	111960853	0.58094	imputed	0.90288	NA	NA	NA	NA
rs61882777	111962102	0.0077647	imputed	0.930042	NA	NA	NA	NA
rs11195024	111962318	0.656987	imputed	0.907746	NA	NA	NA	NA
rs72830441	111963221	0.791998	imputed	0.918759	NA	NA	NA	NA
rs11195025	111964276	0.742424	imputed	0.935524	NA	NA	NA	NA
rs11195026	111964356	0.742633	imputed	0.935618	NA	NA	NA	NA
rs12569752	111964762	0.0115493	imputed	0.961775	NA	NA	NA	NA
rs1891374	111966844	0.711899	imputed	0.949599	NA	NA	NA	NA
rs145057169	111967522	0.00841632	imputed	0.984474	NA	NA	NA	NA
rs72830443	111969133	0.764433	imputed	0.947445	NA	NA	NA	NA
rs113511609	111969919	0.630139	imputed	0.919556	NA	NA	NA	5.6e-05
rs12413668	111970309	0.713038	imputed	0.931914	NA	NA	NA	NA
rs6584980	111972129	0.00339175	imputed	0.96615	NA	NA	NA	NA
rs61277339	111972789	0.772967	imputed	0.950993	NA	NA	NA	NA
rs1977830	111975040	0.747988	imputed	0.958026	NA	NA	NA	NA
rs1977829	111975041	0.823018	imputed	0.96612	NA	NA	NA	NA
rs61882779	111976691	0.0251638	imputed	0.932888	NA	NA	NA	NA
rs12256823	111977189	0.905309	imputed	0.973411	NA	NA	NA	NA
rs7906965	111978986	0.0212008	imputed	0.96279	NA	NA	NA	NA
rs72830445	111979199	0.934505	imputed	0.966459	NA	NA	NA	NA
rs7083406	111979424	0.915319	imputed	0.974831	NA	NA	NA	NA
rs7911398	111979751	0.0247598	imputed	0.970553	NA	NA	NA	NA
rs72830447	111979769	0.934876	imputed	0.967164	NA	NA	NA	NA
rs60719577	111979840	0.189636	imputed	0.946078	NA	NA	NA	NA
rs56176892	111980314	0.172505	imputed	0.951187	NA	NA	NA	NA
rs12264946	111981118	0.918709	imputed	0.975241	NA	NA	NA	NA
rs61882780	111981626	0.0259049	imputed	0.973392	NA	NA	NA	NA
rs117224806	111981829	0.768296	imputed	0.910814	NA	NA	NA	NA
rs10787226	111981917	0.00399639	imputed	0.995335	NA	NA	NA	NA
rs12414179	111981935	0.932937	imputed	0.968291	NA	NA	NA	NA
rs10884939	111981987	0.00333362	imputed	0.97375	NA	NA	NA	NA
rs7072547	111982398	0.909849	imputed	0.976081	NA	NA	NA	NA
rs1573042	111983060	0.00117186	imputed	0.978067	NA	NA	NA	NA
rs7901749	111983278	0.28261	imputed	0.900143	NA	NA	NA	NA
rs73356718	111983935	0.19245	imputed	0.9242	NA	NA	NA	NA
rs4918487	111984756	0.912627	imputed	0.977958	NA	NA	NA	NA
rs4917554	111985027	0.863622	imputed	0.974851	NA	NA	NA	NA
rs35741140	111985946	0.943112	imputed	0.985885	NA	NA	NA	NA
rs116104635	111986570	0.89195	imputed	0.933118	NA	NA	NA	NA
rs113482843	111987195	0.18771	imputed	0.919585	NA	NA	NA	NA
rs950232	111988373	0.00441386	imputed	0.989985	NA	NA	NA	NA
rs3793885	111988578	0.926056	imputed	0.971534	NA	NA	NA	NA
rs72830450	111989086	0.92613	imputed	0.971309	NA	NA	NA	NA
rs35943341	111989149	0.0268632	imputed	0.972754	NA	NA	NA	NA
rs17127166	111989325	0.926481	imputed	0.971314	NA	NA	NA	NA
rs11812839	111989675	0.889072	imputed	0.982753	NA	NA	NA	NA
rs10884940	111989799	0.0174739	imputed	0.985554	NA	NA	NA	NA
rs79100336	111991883	0.932807	imputed	0.971634	NA	NA	NA	NA
rs149324683	111991908	0.0273802	imputed	0.972504	NA	NA	NA	NA
rs17127170	111992222	0.93371	imputed	0.97165	NA	NA	NA	NA
rs12416343	111992624	0.93414	imputed	0.971675	NA	NA	NA	NA
rs2050996	111993697	0.935677	imputed	0.971719	NA	NA	NA	NA
rs10884941	111995565	0.0204889	imputed	0.980176	NA	NA	NA	NA
rs61882783	111997327	0.0382352	imputed	0.974951	NA	NA	NA	NA
rs1891375	112001009	0.00452164	imputed	0.983058	NA	NA	NA	NA
rs12571417	112001499	0.0525983	imputed	0.987962	NA	NA	NA	NA
rs12412423	112002170	0.920304	imputed	0.996221	NA	NA	NA	NA
rs1418362	112003642	0.845353	imputed	0.957382	NA	NA	NA	NA
rs1418361	112003800	0.878406	imputed	0.96146	NA	NA	NA	NA
rs3793887	112004780	0.0537618	imputed	0.989267	NA	NA	NA	NA
rs3793888	112004970	0.846827	imputed	0.972731	NA	NA	NA	NA
rs41291900	112005547	0.915904	imputed	0.997629	NA	NA	NA	NA
rs4918488	112006408	0.856351	imputed	0.967378	NA	NA	NA	NA
rs7897645	112006669	0.00448354	imputed	0.9832	NA	NA	NA	NA
rs7073003	112006973	0.808091	imputed	0.962732	NA	NA	NA	NA
rs72830456	112008631	0.910575	imputed	0.995482	NA	NA	NA	NA
rs72830457	112010671	0.914864	imputed	0.996698	NA	NA	NA	NA
rs11195047	112010830	0.00442363	imputed	0.965967	NA	NA	NA	NA
rs12570837	112010926	0.0539454	imputed	0.990308	NA	NA	NA	NA
rs2010327	112011484	0.0539591	imputed	0.990384	NA	NA	NA	NA
rs58452254	112014007	0.915475	imputed	0.995627	NA	NA	NA	NA
rs7922679	112014428	0.0189051	imputed	0.98607	NA	NA	NA	NA
rs12415370	112015221	0.0183356	imputed	0.989825	NA	NA	NA	NA
rs61882787	112016259	0.0531274	imputed	0.990261	NA	NA	NA	NA
rs10884942	112016926	0.00416775	imputed	0.979487	NA	NA	NA	NA
rs61882788	112018189	0.0527362	imputed	0.98996	NA	NA	NA	NA
rs4917556	112018297	0.906554	imputed	0.952412	NA	NA	NA	NA
rs61882790	112019607	0.0525441	imputed	0.989768	NA	NA	NA	NA
rs10884944	112024562	0.0120022	imputed	0.985174	NA	NA	NA	NA
rs11195055	112025855	0.900314	imputed	0.958252	NA	NA	NA	NA
rs7920438	112025934	0.900349	imputed	0.958201	NA	NA	NA	NA
rs1967840	112026082	0.033429	imputed	0.963683	NA	NA	NA	NA
rs3793889	112027656	0.96224	imputed	0.986235	NA	NA	NA	NA
rs7912643	112027936	0.00441223	imputed	0.978334	NA	NA	NA	NA
rs7917093	112028631	0.903925	imputed	0.96086	NA	NA	NA	NA
rs1935465	112029300	0.0145129	imputed	0.96933	NA	NA	NA	NA
rs10509912	112029405	0.990738	imputed	0.981788	NA	NA	NA	NA
rs7894595	112030880	0.905736	imputed	0.959004	NA	NA	NA	NA
rs12260786	112032145	0.897504	imputed	0.956489	NA	NA	NA	NA
rs148974918	112033051	0.0411665	imputed	0.973528	NA	NA	NA	NA
rs4918489	112034446	0.00495838	imputed	0.971825	NA	NA	NA	NA
rs67762893	112034590	0.0730743	imputed	0.983664	NA	NA	NA	NA
rs3737315	112035508	0.0211358	imputed	0.981157	NA	NA	NA	NA

## Sheet: Supplementary Table S3
Supplementary Table 3. Association results of amino acid residues of the classical HLA genes with BA risk in Chinese population.
Build 37 position (bp)	Variant ID	plink INFO score		Allele 1 Frequency			Plogitic	OR (95%CI)
			Allele 1	317 BA patients	8,843 controls	Allele 2
32740666	AA_DQB1_57_32740666_A	0.9684	P	0.235	0.1757	A	0.0001229	1.44( 1.20 - 1.74)
32740666	AA_DQB1_57_32740666_D	0.9935	P	0.623	0.689	A	0.0004317	0.75( 0.63 - 0.88)
32740615	AA_DQB1_74_32740615_A	0.9882	P	0.1672	0.1208	A	0.0004581	1.46( 1.18 - 1.81)
32740624	AA_DQB1_71_32740624_K	0.9882	P	0.1672	0.1208	A	0.0004581	1.46( 1.18 - 1.81)
32740672	AA_DQB1_55_32740672_L	0.9883	P	0.1672	0.1208	A	0.0004581	1.46( 1.18 - 1.81)
32740681	AA_DQB1_52_32740681	0.9883	L	0.1672	0.1208	P	0.0004581	1.46( 1.18 - 1.81)
32740696	AA_DQB1_47_32740696	0.9882	F	0.1672	0.1208	Y	0.0004581	1.46( 1.18 - 1.81)
32740699	AA_DQB1_46_32740699	0.988	E	0.1672	0.1208	V	0.0004581	1.46( 1.18 - 1.81)
32740726	AA_DQB1_37_32740726_I	0.9888	P	0.1672	0.1208	A	0.0004581	1.46( 1.18 - 1.81)
32740747	AA_DQB1_30_32740747_S	0.9887	P	0.1672	0.1208	A	0.0004581	1.46( 1.18 - 1.81)
32740753	AA_DQB1_28_32740753	0.9882	S	0.1672	0.1208	T	0.0004581	1.46( 1.18 - 1.81)
31432162	AA_B_103_31432162	0.9797	L	0.3391	0.2775	V	0.0006755	1.34( 1.13 - 1.58)
32742295	AA_DQB1_-10_32742295_S	0.9889	P	0.1656	0.1208	A	0.0007099	1.45( 1.17 - 1.79)
31432015	AA_B_152_31432015	0.9594	V	0.6672	0.6017	E	0.0009171	1.33( 1.12 - 1.57)
32659935	AA_DRB1_71_32659935_A	1.025	P	0.1057	0.1537	A	0.0009294	0.65( 0.50 - 0.84)
32665412	AA_DRB1_-1_32665412_S	1.0256	P	0.1057	0.1535	A	0.0009877	0.65( 0.50 - 0.84)
31432509	AA_B_69_31432509_A	0.9585	P	0.2319	0.1807	A	0.001036	1.37( 1.13 - 1.65)
32665412	AA_DRB1_-1_32665412_A	1.0063	P	0.8927	0.8458	A	0.001226	1.52( 1.18 - 1.96)
32659926	AA_DRB1_74_32659926_A	0.9739	A	0.5331	0.4699	P	0.001719	1.29( 1.10 - 1.51)
32657452	AA_DRB1_142_32657452_V	1.0167	P	0.8628	0.8151	A	0.002301	1.43( 1.13 - 1.79)
32657479	AA_DRB1_133_32657479_R	1.0167	P	0.8628	0.8151	A	0.002301	1.43( 1.13 - 1.79)
32657452	AA_DRB1_142_32657452_M	1.0205	P	0.1372	0.1846	A	0.002429	0.7( 0.56 - 0.88)
32657479	AA_DRB1_133_32657479_L	1.0205	P	0.1372	0.1846	A	0.002429	0.7( 0.56 - 0.88)
32659929	AA_DRB1_73_32659929	1.0203	G	0.1767	0.1356	A	0.003129	1.37( 1.11 - 1.69)
32742295	AA_DQB1_-10_32742295_A	0.9826	A	0.1782	0.1372	P	0.003329	1.36( 1.11 - 1.68)
31347092	AA_C_95_31347092_L	0.9873	P	0.8139	0.764	A	0.00357	1.35( 1.10 - 1.66)
31432506	AA_B_70_31432506_S	0.9895	P	0.09621	0.067	A	0.004098	1.48( 1.13 - 1.94)
31432515	AA_B_67_31432515_M	0.9893	P	0.09621	0.067	A	0.004098	1.48( 1.13 - 1.94)
31432518	AA_B_66_31432518_N	0.9878	P	0.09621	0.067	A	0.004098	1.48( 1.13 - 1.94)
31432521	AA_B_65_31432521	0.9724	R	0.09621	0.067	Q	0.004098	1.48( 1.13 - 1.94)
31432530	AA_B_62_31432530	0.9906	G	0.09621	0.067	R	0.004098	1.48( 1.13 - 1.94)
31347555	AA_C_24_31347555	0.9749	S	0.4795	0.423	A	0.004728	1.26( 1.07 - 1.47)
31432503	AA_B_71_31432503	0.9485	A	0.3454	0.2936	T	0.004918	1.27( 1.08 - 1.50)
31432506	AA_B_70_31432506_N	0.9486	P	0.6546	0.7064	A	0.004918	0.79( 0.67 - 0.93)
31432509	AA_B_69_31432509_T	0.9486	P	0.6546	0.7064	A	0.004918	0.79( 0.67 - 0.93)
32740726	AA_DQB1_37_32740726_Y	0.9509	P	0.7539	0.7993	A	0.005179	0.77( 0.64 - 0.93)
32660109	AA_DRB1_13_32660109_R	1.0285	P	0.1372	0.1805	A	0.005189	0.72( 0.57 - 0.91)
32660115	AA_DRB1_11_32660115_P	1.0286	P	0.1372	0.1805	A	0.005189	0.72( 0.57 - 0.91)
31432123	AA_B_116_31432123_L	0.9685	P	0.2177	0.1753	A	0.005978	1.31( 1.08 - 1.59)
32659935	AA_DRB1_71_32659935_K	0.9878	P	0.08517	0.05886	A	0.006031	1.49( 1.12 - 1.98)
32740606	AA_DQB1_77_32740606	0.9982	R	0.3155	0.2663	T	0.006051	1.27( 1.07 - 1.51)
32657590	AA_DRB1_96_32657590_Q	1.0216	P	0.1546	0.1985	A	0.006267	0.74( 0.59 - 0.92)
31347104	AA_C_91_31347104	0.9929	G	0.9558	0.9276	R	0.00672	1.69( 1.15 - 2.48)
32740576	AA_DQB1_87_32740576_F	0.9777	P	0.1404	0.181	A	0.008769	0.74( 0.59 - 0.93)
32659917	AA_DRB1_77_32659917	0.9997	N	0.06782	0.04563	T	0.009044	1.52( 1.11 - 2.09)
32659926	AA_DRB1_74_32659926_R	0.9997	P	0.06782	0.04563	A	0.009044	1.52( 1.11 - 2.09)
31347029	AA_C_116_31347029_S	0.9908	P	0.4653	0.4134	A	0.009138	1.24( 1.05 - 1.45)
31347092	AA_C_95_31347092_I	0.9857	P	0.183	0.2258	A	0.01112	0.77( 0.63 - 0.94)
32740810	AA_DQB1_9_32740810_F	0.9908	P	0.1057	0.1412	A	0.01123	0.72( 0.56 - 0.93)
32665460	AA_DRB1_-17_32665460_T	1.029	P	0.1593	0.1999	A	0.01175	0.76( 0.61 - 0.94)
32740723	AA_DQB1_38_32740723	0.9735	V	0.3943	0.3467	A	0.01332	1.23( 1.04 - 1.44)
32665460	AA_DRB1_-17_32665460_A	1.0142	P	0.8391	0.7993	A	0.01362	1.31( 1.06 - 1.62)
32659947	AA_DRB1_67_32659947_L	0.9917	P	0.3233	0.279	A	0.01469	1.24( 1.04 - 1.46)
32660007	AA_DRB1_47_32660007	0.9827	Y	0.5962	0.5474	F	0.01519	1.22( 1.04 - 1.44)
31347600	AA_C_9_31347600_Y	0.9828	P	0.4132	0.4613	A	0.01714	0.82( 0.70 - 0.97)
32742280	AA_DQB1_-5_32742280_L	0.9934	P	0.08517	0.1157	A	0.01763	0.71( 0.54 - 0.94)
32740612	AA_DQB1_75_32740612	0.9908	V	0.3659	0.3213	L	0.01828	1.22( 1.03 - 1.44)
32740615	AA_DQB1_74_32740615_E	0.9908	P	0.6341	0.6787	A	0.01828	0.82( 0.70 - 0.97)
32740624	AA_DQB1_71_32740624_T	0.99	P	0.6341	0.6787	A	0.01828	0.82( 0.70 - 0.97)
32740639	AA_DQB1_66_32740639	0.9533	D	0.2965	0.2557	E	0.02076	1.23( 1.03 - 1.46)
32740636	AA_DQB1_67_32740636	0.952	I	0.2965	0.2559	V	0.02132	1.23( 1.03 - 1.46)
30019207	AA_A_152_30019207_E	0.8249	P	0.05994	0.08577	A	0.02182	0.68( 0.49 - 0.95)
31431982	AA_B_163_31431982_T	0.928	P	0.1798	0.147	A	0.0221	1.27( 1.04 - 1.57)
32660037	AA_DRB1_37_32660037_S	1.0082	P	0.1845	0.2225	A	0.0235	0.79( 0.64 - 0.97)
31431958	AA_B_171_31431958	0.9718	Y	0.9211	0.893	H	0.02387	1.4( 1.04 - 1.88)
32737913	AA_DQB1_125_32737913_G	0.9784	P	0.1751	0.2122	A	0.02437	0.79( 0.64 - 0.97)
32740627	AA_DQB1_70_32740627_R	0.9949	P	0.7397	0.6983	A	0.02526	1.23( 1.03 - 1.47)
31431982	AA_B_163_31431982_L	0.9577	P	0.4637	0.5088	A	0.02582	0.83( 0.71 - 0.98)
31432186	AA_B_95_31432186_L	0.9688	P	0.4117	0.4561	A	0.0272	0.83( 0.71 - 0.98)
32740810	AA_DQB1_9_32740810_Y	0.9633	P	0.8155	0.7789	A	0.02882	1.26( 1.02 - 1.54)
32713236	AA_DQA1_-16_32713236_L	1.0182	P	0.4322	0.4762	A	0.02919	0.84( 0.71 - 0.98)
32713236	AA_DQA1_-16_32713236_M	1.0188	P	0.5678	0.5238	A	0.02919	1.19( 1.02 - 1.40)
32717257	AA_DQA1_69_32717257_L	1.019	P	0.5678	0.5238	A	0.02919	1.19( 1.02 - 1.40)
31432560	AA_B_52_31432560	0.894	V	0.05678	0.03981	I	0.0329	1.45( 1.03 - 2.05)
31432581	AA_B_45_31432581_G	0.8936	P	0.05678	0.03981	A	0.0329	1.45( 1.03 - 2.05)
32740627	AA_DQB1_70_32740627_G	1.0079	P	0.2098	0.2465	A	0.03461	0.81( 0.67 - 0.99)
32740747	AA_DQB1_30_32740747_Y	1.0019	P	0.6656	0.7041	A	0.03715	0.84( 0.71 - 0.99)
32717200	AA_DQA1_50_32717200_L	1.0099	P	0.3927	0.3535	A	0.04244	1.18( 1.01 - 1.39)
32717209	AA_DQA1_53_32717209_R	1.0099	P	0.3927	0.3535	A	0.04244	1.18( 1.01 - 1.39)
32718464	AA_DQA1_215_32718464_F	1.0098	P	0.6073	0.6465	A	0.04244	0.85( 0.72 - 0.99)
32718464	AA_DQA1_215_32718464_L	1.0095	P	0.3927	0.3536	A	0.04275	1.18( 1.01 - 1.39)
31432003	AA_B_156_31432003_W	0.971	P	0.1562	0.188	A	0.04325	0.8( 0.64 - 0.99)
32740579	AA_DQB1_86_32740579_A	0.9904	P	0.2886	0.3266	A	0.0451	0.84( 0.70 - 1.00)
32659947	AA_DRB1_67_32659947_I	0.99	P	0.358	0.3975	A	0.04601	0.85( 0.72 - 1.00)
33160960	AA_DPB1_178_33160960_M	0.9811	P	0.06467	0.04744	A	0.04622	1.39( 1.00 - 1.92)
32742283	AA_DQB1_-6_32742283_T	0.9934	P	0.7177	0.6801	A	0.04632	1.2( 1.00 - 1.43)
32717152	AA_DQA1_34_32717152	1.0009	E	0.5	0.4601	Q	0.0479	1.17( 1.00 - 1.38)
31347080	AA_C_99_31347080_Y	1.0172	P	0.5268	0.5661	A	0.04997	0.85( 0.73 - 1.00)
32740672	AA_DQB1_55_32740672_R	0.9809	P	0.3738	0.4127	A	0.0506	0.85( 0.72 - 1.00)
32737170	AA_DQB1_203_32737170_I	1.0117	P	0.7571	0.7224	A	0.05479	1.2( 1.00 - 1.44)
32737170	AA_DQB1_203_32737170_V	1.0092	P	0.2429	0.2776	A	0.05479	0.83( 0.69 - 1.00)
31432518	AA_B_66_31432518_I	0.9637	P	0.7902	0.82	A	0.05546	0.83( 0.68 - 1.01)
30019234	AA_A_161_30019234	0.9696	E	0.9811	0.9674	D	0.05554	1.75( 0.98 - 3.11)
31347600	AA_C_9_31347600_D	0.9709	P	0.2934	0.2598	A	0.05864	1.18( 0.99 - 1.41)
32737116	AA_DQB1_221_32737116_Q	0.9926	P	0.3218	0.3575	A	0.06479	0.85( 0.72 - 1.01)
32737116	AA_DQB1_221_32737116_H	0.9947	P	0.6782	0.6425	A	0.06479	1.17( 0.99 - 1.39)
32737119	AA_DQB1_220_32737119_R	0.9926	P	0.3218	0.3575	A	0.06479	0.85( 0.72 - 1.01)
32737119	AA_DQB1_220_32737119_H	0.9947	P	0.6782	0.6425	A	0.06479	1.17( 0.99 - 1.39)
32737913	AA_DQB1_125_32737913_A	0.9947	P	0.6782	0.6425	A	0.06479	1.17( 0.99 - 1.39)
31432889	AA_B_-16_31432889_L	1.0017	P	0.3312	0.2974	A	0.06703	1.17( 0.99 - 1.39)
33156427	AA_DPB1_5_33156427	0.9296	x	0.07256	0.05552	E	0.06713	1.33( 0.98 - 1.81)
31432889	AA_B_-16_31432889_V	1.0009	P	0.6688	0.7025	A	0.06845	0.86( 0.72 - 1.01)
32717191	AA_DQA1_47_32717191_K	1.0332	P	0.1104	0.08934	A	0.06858	1.27( 0.98 - 1.63)
32717206	AA_DQA1_52_32717206_H	1.0331	P	0.1104	0.08934	A	0.06858	1.27( 0.98 - 1.63)
32717212	AA_DQA1_54_32717212	1.0332	L	0.1104	0.08934	F	0.06858	1.27( 0.98 - 1.63)
32717083	AA_DQA1_11_32717083	1.0319	Y	0.6562	0.6209	C	0.07241	1.17( 0.99 - 1.38)
32717104	AA_DQA1_18_32717104	1.0323	S	0.6562	0.6209	F	0.07241	1.17( 0.99 - 1.38)
32717185	AA_DQA1_45_32717185	1.0324	V	0.6562	0.6209	A	0.07241	1.17( 0.99 - 1.38)
32717191	AA_DQA1_47_32717191_R	1.0324	P	0.3438	0.3791	A	0.07241	0.86( 0.73 - 1.01)
32717194	AA_DQA1_48_32717194	1.0321	L	0.6562	0.6209	W	0.07241	1.17( 0.99 - 1.38)
32717200	AA_DQA1_50_32717200_E	1.0324	P	0.3438	0.3791	A	0.07241	0.86( 0.73 - 1.01)
32717206	AA_DQA1_52_32717206_S	1.0324	P	0.3438	0.3791	A	0.07241	0.86( 0.73 - 1.01)
32717209	AA_DQA1_53_32717209_K	1.0321	P	0.3438	0.3791	A	0.07241	0.86( 0.73 - 1.01)
32717215	AA_DQA1_55_32717215	1.0324	R	0.6562	0.6209	G	0.07241	1.17( 0.99 - 1.38)
32717218	AA_DQA1_56_32717218_G	1.0324	P	0.3438	0.3791	A	0.07241	0.86( 0.73 - 1.01)
32717233	AA_DQA1_61_32717233	1.0324	F	0.6562	0.6209	G	0.07241	1.17( 0.99 - 1.38)
32717242	AA_DQA1_64_32717242	1.0324	T	0.6562	0.6209	R	0.07241	1.17( 0.99 - 1.38)
32717248	AA_DQA1_66_32717248	1.0323	I	0.6562	0.6209	M	0.07241	1.17( 0.99 - 1.38)
32717257	AA_DQA1_69_32717257_A	1.0324	P	0.3438	0.3791	A	0.07241	0.86( 0.73 - 1.01)
32717278	AA_DQA1_76_32717278_M	1.0323	P	0.3438	0.3791	A	0.07241	0.86( 0.73 - 1.01)
32717290	AA_DQA1_80_32717290	1.0321	S	0.6562	0.6209	Y	0.07241	1.17( 0.99 - 1.38)
32717988	AA_DQA1_175_32717988_Q	1.0321	P	0.3438	0.3791	A	0.07241	0.86( 0.73 - 1.01)
32718473	AA_DQA1_218_32718473_Q	1.0322	P	0.3438	0.3791	A	0.07241	0.86( 0.73 - 1.01)
32718473	AA_DQA1_218_32718473_R	1.0322	P	0.6562	0.621	A	0.07286	1.17( 0.99 - 1.38)
32740567	AA_DQB1_90_32740567_T	0.9941	P	0.6767	0.6423	A	0.0761	1.17( 0.98 - 1.38)
32740567	AA_DQB1_90_32740567_I	0.9942	P	0.3233	0.3577	A	0.0761	0.86( 0.72 - 1.02)
32740570	AA_DQB1_89_32740570_T	0.9939	P	0.6767	0.6423	A	0.0761	1.17( 0.98 - 1.38)
32740570	AA_DQB1_89_32740570_G	0.9941	P	0.3233	0.3577	A	0.0761	0.86( 0.72 - 1.02)
32740576	AA_DQB1_87_32740576_L	0.9927	P	0.6767	0.6423	A	0.0761	1.17( 0.98 - 1.38)
32740579	AA_DQB1_86_32740579_E	0.9929	P	0.6767	0.6423	A	0.0761	1.17( 0.98 - 1.38)
32740582	AA_DQB1_85_32740582_L	0.9941	P	0.6767	0.6423	A	0.0761	1.17( 0.98 - 1.38)
32740582	AA_DQB1_85_32740582_V	0.994	P	0.3233	0.3577	A	0.0761	0.86( 0.72 - 1.02)
32740585	AA_DQB1_84_32740585_Q	0.994	P	0.6767	0.6423	A	0.0761	1.17( 0.98 - 1.38)
32740585	AA_DQB1_84_32740585_E	0.994	P	0.3233	0.3577	A	0.0761	0.86( 0.72 - 1.02)
32740678	AA_DQB1_53_32740678	0.9929	L	0.6767	0.6423	Q	0.0761	1.17( 0.98 - 1.38)
31346909	AA_C_156_31346909_D	1.0003	P	0.003155	0.01029	A	0.07664	0.3( 0.08 - 1.23)
31347092	AA_C_95_31347092_F	1.0003	P	0.003155	0.01029	A	0.07664	0.3( 0.08 - 1.23)
32742277	AA_DQB1_-4_32742277_V	1.0083	P	0.7539	0.7222	A	0.07927	1.18( 0.98 - 1.42)
32742280	AA_DQB1_-5_32742280_P	1.0083	P	0.7539	0.7222	A	0.07927	1.18( 0.98 - 1.42)
32742328	AA_DQB1_-21_32742328_G	1.0083	P	0.7539	0.7222	A	0.07927	1.18( 0.98 - 1.42)
33144526	AA_DPA1_190_33144526	0.8337	A	0.02997	0.02002	T	0.08126	1.51( 0.95 - 2.42)
33145022	AA_DPA1_96_33145022	0.8381	P	0.97	0.98	A	0.08126	0.66( 0.41 - 1.06)
33145431	AA_DPA1_73_33145431	0.838	A	0.02997	0.02002	L	0.08126	1.51( 0.95 - 2.42)
33145434	AA_DPA1_72_33145434	0.838	I	0.02997	0.02002	T	0.08126	1.51( 0.95 - 2.42)
33145596	AA_DPA1_18_33145596	0.8381	T	0.02997	0.02002	P	0.08126	1.51( 0.95 - 2.42)
33145626	AA_DPA1_8_33145626	0.835	x	0.02997	0.02002	T	0.08126	1.51( 0.95 - 2.42)
31347086	AA_C_97_31347086	0.9787	W	0.3565	0.3238	R	0.08402	1.16( 0.98 - 1.37)
32657590	AA_DRB1_96_32657590_H	1.0037	P	0.7035	0.6713	A	0.09014	1.16( 0.98 - 1.38)
32718440	AA_DQA1_207_32718440_M	1.0021	P	0.1514	0.1775	A	0.09015	0.83( 0.66 - 1.03)
32718440	AA_DQA1_207_32718440_V	1.0016	P	0.8486	0.8225	A	0.09015	1.21( 0.97 - 1.51)
30018561	AA_A_17_30018561	1.0098	S	0.07256	0.05665	R	0.09029	1.30( 0.96 - 1.77)
30019093	AA_A_114_30019093_E	1.0099	P	0.07256	0.05665	A	0.09029	1.3( 0.96 - 1.77)
30019099	AA_A_116_30019099_H	1.0099	P	0.07256	0.05665	A	0.09029	1.3( 0.96 - 1.77)
30019207	AA_A_152_30019207_W	1.0096	P	0.07256	0.05665	A	0.09029	1.3( 0.96 - 1.77)
30018738	AA_A_76_30018738_A	1.0042	P	0.05363	0.07107	A	0.09173	0.74( 0.52 - 1.05)
31346846	AA_C_177_31346846	1.0016	E	0.8943	0.8717	K	0.09346	1.25( 0.96 - 1.61)
33151801	AA_DPB1_-28_33151801	0.9287	x	0.07098	0.05558	M	0.09789	1.3( 0.95 - 1.77)
33151894	AA_DPB1_4_33151894	0.9278	x	0.07098	0.05558	P	0.09789	1.3( 0.95 - 1.77)
33151804	AA_DPB1_-27_33151804	0.9291	x	0.07098	0.05564	V	0.09928	1.3( 0.95 - 1.77)
33151807	AA_DPB1_-26_33151807	0.9292	x	0.07098	0.05564	L	0.09928	1.3( 0.95 - 1.77)
33151810	AA_DPB1_-25_33151810	0.9292	x	0.07098	0.05564	Q	0.09928	1.3( 0.95 - 1.77)
33151813	AA_DPB1_-24_33151813	0.929	x	0.07098	0.05564	V	0.09928	1.3( 0.95 - 1.77)
33151816	AA_DPB1_-23_33151816	0.929	x	0.07098	0.05564	S	0.09928	1.3( 0.95 - 1.77)
33151819	AA_DPB1_-22_33151819	0.9289	x	0.07098	0.05564	A	0.09928	1.3( 0.95 - 1.77)
33151822	AA_DPB1_-21_33151822	0.9288	x	0.07098	0.05564	A	0.09928	1.3( 0.95 - 1.77)
33151828	AA_DPB1_-19_33151828	0.9292	x	0.07098	0.05564	R	0.09928	1.3( 0.95 - 1.77)
33151834	AA_DPB1_-17_33151834	0.9288	x	0.07098	0.05564	V	0.09928	1.3( 0.95 - 1.77)
33151837	AA_DPB1_-16_33151837	0.9291	x	0.07098	0.05564	A	0.09928	1.3( 0.95 - 1.77)
33151840	AA_DPB1_-15_33151840	0.9291	x	0.07098	0.05564	L	0.09928	1.3( 0.95 - 1.77)
33151843	AA_DPB1_-14_33151843	0.9288	x	0.07098	0.05564	T	0.09928	1.3( 0.95 - 1.77)
33151846	AA_DPB1_-13_33151846	0.9289	x	0.07098	0.05564	A	0.09928	1.3( 0.95 - 1.77)
33151849	AA_DPB1_-12_33151849	0.9291	x	0.07098	0.05564	L	0.09928	1.3( 0.95 - 1.77)
33151852	AA_DPB1_-11_33151852	0.9289	x	0.07098	0.05564	L	0.09928	1.3( 0.95 - 1.77)
33151855	AA_DPB1_-10_33151855	0.9291	x	0.07098	0.05564	M	0.09928	1.3( 0.95 - 1.77)
33151858	AA_DPB1_-9_33151858	0.9291	x	0.07098	0.05564	V	0.09928	1.3( 0.95 - 1.77)
33151861	AA_DPB1_-8_33151861	0.9291	x	0.07098	0.05564	L	0.09928	1.3( 0.95 - 1.77)
33151864	AA_DPB1_-7_33151864	0.929	x	0.07098	0.05564	L	0.09928	1.3( 0.95 - 1.77)
33151867	AA_DPB1_-6_33151867	0.9291	x	0.07098	0.05564	T	0.09928	1.3( 0.95 - 1.77)
33151870	AA_DPB1_-5_33151870	0.9291	x	0.07098	0.05564	S	0.09928	1.3( 0.95 - 1.77)
33151873	AA_DPB1_-4_33151873	0.9289	x	0.07098	0.05564	V	0.09928	1.3( 0.95 - 1.77)
33151876	AA_DPB1_-3_33151876	0.9287	x	0.07098	0.05564	V	0.09928	1.3( 0.95 - 1.77)
33151879	AA_DPB1_-2_33151879	0.9288	x	0.07098	0.05564	Q	0.09928	1.3( 0.95 - 1.77)
33151882	AA_DPB1_-1_33151882	0.9288	x	0.07098	0.05564	G	0.09928	1.3( 0.95 - 1.77)
33151885	AA_DPB1_1_33151885	0.9291	x	0.07098	0.05564	R	0.09928	1.3( 0.95 - 1.77)
33151888	AA_DPB1_2_33151888	0.9291	x	0.07098	0.05564	A	0.09928	1.3( 0.95 - 1.77)
33151891	AA_DPB1_3_33151891	0.9291	x	0.07098	0.05564	T	0.09928	1.3( 0.95 - 1.77)
32660115	AA_DRB1_11_32660115_G	1.0339	P	0.1088	0.08973	A	0.09935	1.24( 0.96 - 1.60)
32660058	AA_DRB1_30_32660058_L	1.033	P	0.1088	0.08979	A	0.1005	1.24( 0.96 - 1.60)
32660073	AA_DRB1_25_32660073	1.0333	Q	0.1088	0.08979	R	0.1005	1.24( 0.96 - 1.60)
32660106	AA_DRB1_14_32660106	1.0336	K	0.1088	0.08979	E	0.1005	1.24( 0.96 - 1.60)
32660109	AA_DRB1_13_32660109_Y	1.0337	P	0.1088	0.08979	A	0.1005	1.24( 0.96 - 1.60)
33151825	AA_DPB1_-20_33151825	0.9288	x	0.07098	0.05569	P	0.1007	1.3( 0.95 - 1.77)
33151831	AA_DPB1_-18_33151831	0.9289	x	0.07098	0.05569	T	0.1007	1.3( 0.95 - 1.77)
33161570	AA_DPB1_199_33161570	0.9559	x	0.07098	0.05569	T	0.1007	1.3( 0.95 - 1.77)
32657566	AA_DRB1_104_32657566_A	1.0074	P	0.3833	0.3517	A	0.1026	1.15( 0.97 - 1.35)
32657584	AA_DRB1_98_32657584_E	1.0074	P	0.3833	0.3517	A	0.1026	1.15( 0.97 - 1.35)
32659926	AA_DRB1_74_32659926_Q	1.0316	P	0.1088	0.08996	A	0.1038	1.24( 0.96 - 1.60)
31432003	AA_B_156_31432003_L	0.9716	P	0.7902	0.7624	A	0.1055	1.17( 0.97 - 1.43)
32657566	AA_DRB1_104_32657566_S	1.005	P	0.6167	0.648	A	0.1057	0.87( 0.74 - 1.03)
32657584	AA_DRB1_98_32657584_K	1.005	P	0.6167	0.648	A	0.1057	0.87( 0.74 - 1.03)
33151798	AA_DPB1_-29_33151798	0.9267	x	0.07098	0.05598	M	0.1079	1.29( 0.95 - 1.76)
33156517	AA_DPB1_35_33156517_Y	0.9131	P	0.07098	0.05609	A	0.111	1.29( 0.94 - 1.75)
31432129	AA_B_114_31432129_N	0.9917	P	0.5962	0.5647	A	0.1155	1.14( 0.97 - 1.34)
32742277	AA_DQB1_-4_32742277_L	0.9962	P	0.2334	0.2613	A	0.1158	0.86( 0.71 - 1.04)
32742283	AA_DQB1_-6_32742283_S	0.9966	P	0.2334	0.2613	A	0.1158	0.86( 0.71 - 1.04)
32742328	AA_DQB1_-21_32742328_D	0.9962	P	0.2334	0.2613	A	0.1158	0.86( 0.71 - 1.04)
30019204	AA_A_151_30019204	1.0126	R	0.2192	0.1947	H	0.1263	1.16( 0.96 - 1.41)
31347600	AA_C_9_31347600_F	1.0324	P	0.1861	0.1632	A	0.1263	1.17( 0.96 - 1.44)
31347609	AA_C_6_31347609	1.0328	K	0.1861	0.1632	R	0.1263	1.17( 0.96 - 1.44)
31347080	AA_C_99_31347080_C	1.0313	P	0.1861	0.1633	A	0.1283	1.17( 0.96 - 1.44)
31432506	AA_B_70_31432506_Q	0.9444	P	0.2413	0.216	A	0.1292	1.15( 0.96 - 1.39)
31432515	AA_B_67_31432515_Y	0.9422	P	0.2413	0.216	A	0.1292	1.15( 0.96 - 1.39)
32717988	AA_DQA1_175_32717988_E	1.0067	P	0.4811	0.4506	A	0.1303	1.13( 0.96 - 1.32)
32659890	AA_DRB1_86_32659890	0.9538	G	0.5994	0.5692	V	0.131	1.13( 0.96 - 1.33)
32657335	AA_DRB1_181_32657335_T	0.9927	P	0.7177	0.7443	A	0.1311	0.87( 0.73 - 1.04)
32659935	AA_DRB1_71_32659935_R	0.9986	P	0.7681	0.7415	A	0.1317	1.16( 0.96 - 1.39)
33161989	AA_DPB1_229_33161989	0.9567	x	0.0694	0.05541	A	0.1319	1.27( 0.93 - 1.74)
31432129	AA_B_114_31432129_D	0.9907	P	0.3959	0.426	A	0.1321	0.88( 0.75 - 1.04)
31347080	AA_C_99_31347080_S	1.0075	P	0.1703	0.1488	A	0.1342	1.18( 0.95 - 1.45)
30018738	AA_A_76_30018738_V	1.0129	P	0.7776	0.7517	A	0.137	1.16( 0.96 - 1.40)
30018741	AA_A_77_30018741_D	1.0124	P	0.7776	0.7517	A	0.137	1.16( 0.96 - 1.40)
31432180	AA_B_97_31432180_T	0.9815	P	0.3091	0.2821	A	0.1381	1.14( 0.96 - 1.35)
33161534	AA_DPB1_187_33161534	0.9583	x	0.0694	0.05569	K	0.1408	1.26( 0.92 - 1.73)
33161537	AA_DPB1_188_33161537	0.9592	x	0.0694	0.05569	A	0.1408	1.26( 0.92 - 1.73)
33161540	AA_DPB1_189_33161540	0.9592	x	0.0694	0.05569	Q	0.1408	1.26( 0.92 - 1.73)
33161543	AA_DPB1_190_33161543	0.959	x	0.0694	0.05569	S	0.1408	1.26( 0.92 - 1.73)
33161546	AA_DPB1_191_33161546	0.959	x	0.0694	0.05569	D	0.1408	1.26( 0.92 - 1.73)
33161549	AA_DPB1_192_33161549	0.9588	x	0.0694	0.05569	S	0.1408	1.26( 0.92 - 1.73)
33161552	AA_DPB1_193_33161552	0.9592	x	0.0694	0.05569	A	0.1408	1.26( 0.92 - 1.73)
33161555	AA_DPB1_194_33161555_x	0.9593	P	0.0694	0.05569	A	0.1408	1.26( 0.92 - 1.73)
33161558	AA_DPB1_195_33161558	0.9592	x	0.0694	0.05569	S	0.1408	1.26( 0.92 - 1.73)
33161561	AA_DPB1_196_33161561	0.9568	x	0.0694	0.05569	K	0.1408	1.26( 0.92 - 1.73)
33161564	AA_DPB1_197_33161564	0.9549	x	0.0694	0.05569	T	0.1408	1.26( 0.92 - 1.73)
33161567	AA_DPB1_198_33161567	0.9567	x	0.0694	0.05569	L	0.1408	1.26( 0.92 - 1.73)
33161573	AA_DPB1_200_33161573	0.9548	x	0.0694	0.05569	G	0.1408	1.26( 0.92 - 1.73)
33161576	AA_DPB1_201_33161576	0.9569	x	0.0694	0.05569	A	0.1408	1.26( 0.92 - 1.73)
33161588	AA_DPB1_205_33161588_x	0.9521	P	0.0694	0.05569	A	0.1408	1.26( 0.92 - 1.73)
33161594	AA_DPB1_207_33161594	0.9517	x	0.0694	0.05569	G	0.1408	1.26( 0.92 - 1.73)
33161597	AA_DPB1_208_33161597	0.9506	x	0.0694	0.05569	L	0.1408	1.26( 0.92 - 1.73)
33161600	AA_DPB1_209_33161600	0.952	x	0.0694	0.05569	I	0.1408	1.26( 0.92 - 1.73)
33161603	AA_DPB1_210_33161603	0.9527	x	0.0694	0.05569	I	0.1408	1.26( 0.92 - 1.73)
33161606	AA_DPB1_211_33161606	0.9534	x	0.0694	0.05569	C	0.1408	1.26( 0.92 - 1.73)
33161609	AA_DPB1_212_33161609	0.9521	x	0.0694	0.05569	G	0.1408	1.26( 0.92 - 1.73)
33161618	AA_DPB1_215_33161618_x	0.9511	P	0.0694	0.05569	A	0.1408	1.26( 0.92 - 1.73)
33161621	AA_DPB1_216_33161621	0.9512	x	0.0694	0.05569	F	0.1408	1.26( 0.92 - 1.73)
33161624	AA_DPB1_217_33161624	0.9533	x	0.0694	0.05569	M	0.1408	1.26( 0.92 - 1.73)
33161627	AA_DPB1_218_33161627	0.9531	x	0.0694	0.05569	H	0.1408	1.26( 0.92 - 1.73)
33161630	AA_DPB1_219_33161630	0.9526	x	0.0694	0.05569	R	0.1408	1.26( 0.92 - 1.73)
33161633	AA_DPB1_220_33161633	0.9528	x	0.0694	0.05569	R	0.1408	1.26( 0.92 - 1.73)
33161636	AA_DPB1_221_33161636	0.9551	x	0.0694	0.05569	S	0.1408	1.26( 0.92 - 1.73)
33161639	AA_DPB1_222_33161639	0.9489	x	0.0694	0.05569	K	0.1408	1.26( 0.92 - 1.73)
33161642	AA_DPB1_223_33161642	0.9519	x	0.0694	0.05569	K	0.1408	1.26( 0.92 - 1.73)
33161974	AA_DPB1_224_33161974	0.9537	x	0.0694	0.05569	V	0.1408	1.26( 0.92 - 1.73)
33161977	AA_DPB1_225_33161977	0.9535	x	0.0694	0.05569	Q	0.1408	1.26( 0.92 - 1.73)
33161980	AA_DPB1_226_33161980	0.9531	x	0.0694	0.05569	R	0.1408	1.26( 0.92 - 1.73)
33161983	AA_DPB1_227_33161983	0.9527	x	0.0694	0.05569	G	0.1408	1.26( 0.92 - 1.73)
33161579	AA_DPB1_202_33161579	0.956	x	0.0694	0.05575	G	0.1426	1.26( 0.92 - 1.73)
33161582	AA_DPB1_203_33161582	0.9536	x	0.0694	0.05575	G	0.1426	1.26( 0.92 - 1.73)
33161591	AA_DPB1_206_33161591	0.9526	x	0.0694	0.05575	L	0.1426	1.26( 0.92 - 1.73)
33161612	AA_DPB1_213_33161612	0.9508	x	0.0694	0.05575	V	0.1426	1.26( 0.92 - 1.73)
33161618	AA_DPB1_215_33161618_I	0.9488	P	0.9306	0.9442	A	0.1426	0.79( 0.58 - 1.08)
33161986	AA_DPB1_228_33161986	0.955	x	0.0694	0.05575	S	0.1426	1.26( 0.92 - 1.73)
32657335	AA_DRB1_181_32657335_M	0.9968	P	0.2808	0.2549	A	0.1434	1.14( 0.96 - 1.36)
32660070	AA_DRB1_26_32660070_Y	1.0063	P	0.2224	0.1988	A	0.1442	1.15( 0.95 - 1.40)
33161585	AA_DPB1_204_33161585	0.9555	x	0.0694	0.05581	F	0.1445	1.26( 0.92 - 1.73)
31432874	AA_B_-11_31432874_W	0.9946	P	0.5442	0.5149	A	0.1478	1.13( 0.96 - 1.32)
33161615	AA_DPB1_214_33161615	0.9509	x	0.0694	0.05592	G	0.1482	1.26( 0.92 - 1.72)
31432874	AA_B_-11_31432874_S	0.9945	P	0.4558	0.4849	A	0.1502	0.89( 0.76 - 1.04)
30018720	AA_A_70_30018720	0.9889	Q	0.358	0.3314	H	0.1625	1.13( 0.95 - 1.33)
32717850	AA_DQA1_129_32717850_Q	1.0089	P	0.2587	0.2841	A	0.1632	0.88( 0.73 - 1.05)
32717850	AA_DQA1_129_32717850_H	1.0088	P	0.7413	0.7159	A	0.1632	1.14( 0.95 - 1.36)
31346909	AA_C_156_31346909_R	1.0134	P	0.3233	0.2976	A	0.1646	1.13( 0.95 - 1.34)
31432003	AA_B_156_31432003_D	0.9279	P	0.02839	0.02052	A	0.1726	1.39( 0.86 - 2.25)
31432515	AA_B_67_31432515_S	0.95	P	0.4842	0.5118	A	0.173	0.9( 0.76 - 1.05)
32660058	AA_DRB1_30_32660058_H	0.9333	P	0.1136	0.1321	A	0.1739	0.84( 0.66 - 1.08)
30019078	AA_A_109_30019078	0.9724	F	0.9921	0.9857	L	0.1778	1.83( 0.75 - 4.44)
31346046	AA_C_248_31346046_M	1.0313	P	0.183	0.1628	A	0.1783	1.15( 0.94 - 1.41)
33156445	AA_DPB1_11_33156445	0.9425	L	0.2192	0.1976	G	0.1796	1.14( 0.94 - 1.38)
33161555	AA_DPB1_194_33161555_R	0.9361	P	0.929	0.9418	A	0.1799	0.81( 0.59 - 1.10)
31432515	AA_B_67_31432515_F	0.9902	P	0.1104	0.1285	A	0.181	0.84( 0.65 - 1.08)
31346046	AA_C_248_31346046_V	1.0292	P	0.817	0.8369	A	0.1834	0.87( 0.71 - 1.07)
31347357	AA_C_90_31347357	0.9767	D	0.3533	0.3281	A	0.1835	1.12( 0.95 - 1.32)
32660037	AA_DRB1_37_32660037_F	1.0054	P	0.1735	0.1541	A	0.1853	1.15( 0.93 - 1.42)
33156439	AA_DPB1_9_33156439_F	0.9427	P	0.7808	0.8019	A	0.1905	0.88( 0.73 - 1.07)
33156436	AA_DPB1_8_33156436	0.9415	V	0.2192	0.1984	L	0.1967	1.14( 0.94 - 1.37)
31347035	AA_C_114_31347035	0.989	D	0.8328	0.8125	N	0.1975	1.15( 0.93 - 1.42)
31432680	AA_B_12_31432680	1.0107	M	0.806	0.7846	V	0.198	1.14( 0.93 - 1.39)
31432683	AA_B_11_31432683	1.0113	A	0.806	0.7846	S	0.198	1.14( 0.93 - 1.39)
31345841	AA_C_275_31345841_E	0.9971	P	0.8312	0.811	A	0.2001	1.15( 0.93 - 1.42)
32659914	AA_DRB1_78_32659914	1.0009	V	0.2634	0.2413	Y	0.2009	1.13( 0.94 - 1.35)
30018338	AA_A_-15_30018338_V	1.018	P	0.4905	0.5163	A	0.2025	0.90( 0.77 - 1.06)
30018338	AA_A_-15_30018338_L	1.0217	P	0.5095	0.4837	A	0.2025	1.11( 0.95 - 1.30)
32740702	AA_DQB1_45_32740702	0.9543	G	0.7744	0.7525	E	0.207	1.13( 0.93 - 1.37)
33156664	AA_DPB1_84_33156664_D	0.9796	P	0.6183	0.5935	A	0.2109	1.11( 0.94 - 1.31)
33156673	AA_DPB1_87_33156673	0.9816	V	0.6183	0.5935	M	0.2109	1.11( 0.94 - 1.31)
33156667	AA_DPB1_85_33156667	0.9816	E	0.6183	0.5935	G	0.2119	1.11( 0.94 - 1.31)
33156670	AA_DPB1_86_33156670	0.9816	P	0.3817	0.4065	A	0.2119	0.9( 0.77 - 1.06)
30020322	AA_A_297_30020322_V	0.9571	P	0.9921	0.9863	A	0.2137	1.75( 0.72 - 4.25)
30020322	AA_A_297_30020322_M	0.9841	P	0.007886	0.01368	A	0.2137	0.57( 0.24 - 1.39)
32665400	AA_DRB1_4_32665400_R	0.9974	P	0.735	0.7565	A	0.2154	0.89( 0.75 - 1.07)
31432186	AA_B_95_31432186_I	0.9758	P	0.2744	0.2527	A	0.2158	1.12( 0.94 - 1.34)
31347029	AA_C_116_31347029_L	0.9911	P	0.02839	0.03788	A	0.2168	0.74( 0.46 - 1.19)
31432186	AA_B_95_31432186_W	0.9772	P	0.3139	0.2912	A	0.217	1.11( 0.94 - 1.32)
30018741	AA_A_77_30018741_S	0.9848	P	0.007886	0.01363	A	0.2173	0.58( 0.24 - 1.40)
33160960	AA_DPB1_178_33160960_L	0.9553	P	0.9227	0.935	A	0.2176	0.83( 0.62 - 1.12)
31432180	AA_B_97_31432180_S	0.9312	P	0.06467	0.07791	A	0.2202	0.82( 0.59 - 1.13)
31347624	AA_C_1_31347624_C	0.9849	P	0.7224	0.6997	A	0.2203	1.12( 0.94 - 1.33)
31347624	AA_C_1_31347624_G	0.9914	P	0.2776	0.3003	A	0.2203	0.9( 0.75 - 1.07)
33156439	AA_DPB1_9_33156439_H	0.9619	P	0.09306	0.07967	A	0.2223	1.19( 0.90 - 1.56)
32740759	AA_DQB1_26_32740759_Y	0.9569	P	0.3044	0.3274	A	0.2247	0.9( 0.76 - 1.07)
32740798	AA_DQB1_13_32740798	0.9569	G	0.6956	0.6726	A	0.2247	1.11( 0.94 - 1.32)
31432494	AA_B_74_31432494	0.9493	D	0.2697	0.2485	Y	0.225	1.12( 0.93 - 1.34)
32660037	AA_DRB1_37_32660037_N	0.995	P	0.2666	0.2455	A	0.2266	1.12( 0.93 - 1.34)
31346921	AA_C_152_31346921_T	1.0066	P	0.1025	0.1182	A	0.2295	0.85( 0.66 - 1.11)
31347029	AA_C_116_31347029_Y	1.0096	P	0.3155	0.3384	A	0.23	0.9( 0.76 - 1.07)
31347585	AA_C_14_31347585	1.0011	R	0.9495	0.9379	W	0.2304	1.25( 0.87 - 1.79)
33156664	AA_DPB1_84_33156664_G	0.9823	P	0.3817	0.4054	A	0.2322	0.91( 0.77 - 1.07)
30019881	AA_A_184_30019881_A	0.9926	P	0.3517	0.375	A	0.2334	0.9( 0.77 - 1.07)
30019881	AA_A_184_30019881_P	0.9927	P	0.6483	0.625	A	0.2334	1.11( 0.94 - 1.31)
31347480	AA_C_49_31347480	1.0013	A	0.9495	0.938	E	0.2346	1.24( 0.87 - 1.78)
32665400	AA_DRB1_4_32665400_Q	1.006	P	0.2634	0.2429	A	0.2373	1.12( 0.93 - 1.33)
30018741	AA_A_77_30018741_N	1.0133	P	0.2145	0.2347	A	0.238	0.89( 0.73 - 1.08)
31347029	AA_C_116_31347029_F	0.9702	P	0.1909	0.2102	A	0.239	0.89( 0.72 - 1.08)
30019042	AA_A_97_30019042_R	1.0064	P	0.3186	0.3411	A	0.24	0.9( 0.76 - 1.07)
32660121	AA_DRB1_9_32660121_W	1.0287	P	0.2681	0.2897	A	0.24	0.9( 0.75 - 1.07)
31347522	AA_C_35_31347522	1.0071	R	0.8959	0.8806	Q	0.2417	1.17( 0.90 - 1.51)
32737787	AA_DQB1_167_32737787_H	0.9589	P	0.3044	0.3265	A	0.2431	0.9( 0.76 - 1.07)
32737787	AA_DQB1_167_32737787_R	0.9569	P	0.6956	0.6735	A	0.2431	1.11( 0.93 - 1.32)
32740759	AA_DQB1_26_32740759_L	0.9655	P	0.4953	0.472	A	0.248	1.1( 0.94 - 1.29)
31432174	AA_B_99_31432174_Y	0.9405	P	0.9826	0.9877	A	0.2569	0.7( 0.38 - 1.30)
31432174	AA_B_99_31432174_S	0.9811	P	0.01735	0.01227	A	0.2569	1.42( 0.77 - 2.62)
32657458	AA_DRB1_140_32657458_T	0.9994	P	0.5773	0.5546	A	0.2579	1.1( 0.93 - 1.29)
32659893	AA_DRB1_85_32659893	0.9342	V	0.8817	0.8662	A	0.2581	1.15( 0.90 - 1.47)
32660034	AA_DRB1_38_32660034_L	0.9332	P	0.1183	0.1337	A	0.2614	0.87( 0.68 - 1.11)
32660037	AA_DRB1_37_32660037_L	0.9328	P	0.1183	0.1337	A	0.2614	0.87( 0.68 - 1.11)
30018537	AA_A_9_30018537_T	0.9947	P	0.1388	0.1238	A	0.2616	1.14( 0.91 - 1.44)
32657458	AA_DRB1_140_32657458_A	1.0017	P	0.4227	0.4452	A	0.2639	0.91( 0.78 - 1.07)
31345841	AA_C_275_31345841_G	1.0067	P	0.1041	0.1186	A	0.2673	0.86( 0.67 - 1.12)
31345757	AA_C_303_31345757_V	0.9939	P	0.9479	0.9371	A	0.2686	1.22( 0.86 - 1.74)
31432485	AA_B_77_31432485_D	0.9725	P	0.01735	0.01238	A	0.2697	1.41( 0.76 - 2.59)
32660115	AA_DRB1_11_32660115_V	1.0016	P	0.1372	0.1227	A	0.2741	1.14( 0.90 - 1.43)
32742319	AA_DQB1_-18_32742319_A	0.9777	P	0.47	0.4482	A	0.2777	1.09( 0.93 - 1.28)
31345757	AA_C_303_31345757_M	0.9991	P	0.05205	0.06265	A	0.278	0.82( 0.58 - 1.17)
31432485	AA_B_77_31432485_S	1.005	P	0.6183	0.6391	A	0.2829	0.91( 0.78 - 1.08)
31432123	AA_B_116_31432123_Y	1.0175	P	0.3202	0.3407	A	0.2849	0.91( 0.77 - 1.08)
31432036	AA_B_145_31432036	0.9951	L	0.1183	0.1051	R	0.2863	1.14( 0.89 - 1.46)
31432644	AA_B_24_31432644_S	1.009	P	0.1451	0.1606	A	0.2966	0.89( 0.71 - 1.11)
33144412	AA_DPA1_228_33144412	0.9939	P	0.6656	0.6455	T	0.2976	1.09( 0.92 - 1.29)
33144929	AA_DPA1_127_33144929	0.9938	P	0.6656	0.6455	L	0.2976	1.09( 0.92 - 1.29)
33144830	AA_DPA1_160_33144830	0.9938	V	0.6656	0.6456	F	0.3002	1.09( 0.92 - 1.29)
33145401	AA_DPA1_83_33145401	0.9948	A	0.6656	0.6456	T	0.3002	1.09( 0.92 - 1.29)
33145500	AA_DPA1_50_33145500	0.9952	R	0.6656	0.6457	Q	0.3016	1.09( 0.92 - 1.29)
33149234	AA_DPA1_-1_33149234	0.9909	x	0.6656	0.6457	A	0.303	1.09( 0.92 - 1.29)
33149237	AA_DPA1_-2_33149237	0.9909	x	0.6656	0.6458	G	0.3057	1.09( 0.92 - 1.29)
33149240	AA_DPA1_-3_33149240	0.9909	x	0.6656	0.6458	A	0.3057	1.09( 0.92 - 1.29)
33149243	AA_DPA1_-4_33149243	0.9909	x	0.6656	0.6458	G	0.3057	1.09( 0.92 - 1.29)
33149246	AA_DPA1_-5_33149246	0.9909	x	0.6656	0.6458	R	0.3057	1.09( 0.92 - 1.29)
33149249	AA_DPA1_-6_33149249	0.991	x	0.6656	0.6458	L	0.3057	1.09( 0.92 - 1.29)
33149252	AA_DPA1_-7_33149252	0.9909	x	0.6656	0.6458	S	0.3057	1.09( 0.92 - 1.29)
33149255	AA_DPA1_-8_33149255	0.991	x	0.6656	0.6458	L	0.3057	1.09( 0.92 - 1.29)
33149258	AA_DPA1_-9_33149258	0.9909	x	0.6656	0.6458	L	0.3057	1.09( 0.92 - 1.29)
33149261	AA_DPA1_-10_33149261	0.9909	x	0.6656	0.6458	F	0.3057	1.09( 0.92 - 1.29)
33149264	AA_DPA1_-11_33149264	0.9909	x	0.6656	0.6458	A	0.3057	1.09( 0.92 - 1.29)
33149267	AA_DPA1_-12_33149267	0.9909	x	0.6656	0.6458	L	0.3057	1.09( 0.92 - 1.29)
33149270	AA_DPA1_-13_33149270	0.9909	x	0.6656	0.6458	S	0.3057	1.09( 0.92 - 1.29)
33149273	AA_DPA1_-14_33149273	0.9909	x	0.6656	0.6458	L	0.3057	1.09( 0.92 - 1.29)
33149276	AA_DPA1_-15_33149276	0.9909	x	0.6656	0.6458	A	0.3057	1.09( 0.92 - 1.29)
33149279	AA_DPA1_-16_33149279	0.9909	x	0.6656	0.6458	R	0.3057	1.09( 0.92 - 1.29)
33149282	AA_DPA1_-17_33149282	0.9909	x	0.6656	0.6458	L	0.3057	1.09( 0.92 - 1.29)
33149285	AA_DPA1_-18_33149285	0.9909	x	0.6656	0.6458	I	0.3057	1.09( 0.92 - 1.29)
33149288	AA_DPA1_-19_33149288	0.9909	x	0.6656	0.6458	V	0.3057	1.09( 0.92 - 1.29)
33149291	AA_DPA1_-20_33149291	0.9909	x	0.6656	0.6458	A	0.3057	1.09( 0.92 - 1.29)
33149294	AA_DPA1_-21_33149294	0.9909	x	0.6656	0.6458	R	0.3057	1.09( 0.92 - 1.29)
33149297	AA_DPA1_-22_33149297	0.9908	x	0.6656	0.6458	I	0.3057	1.09( 0.92 - 1.29)
33149300	AA_DPA1_-23_33149300	0.9909	x	0.6656	0.6458	H	0.3057	1.09( 0.92 - 1.29)
33149303	AA_DPA1_-24_33149303	0.9909	x	0.6656	0.6458	F	0.3057	1.09( 0.92 - 1.29)
33149306	AA_DPA1_-25_33149306	0.9909	x	0.6656	0.6458	M	0.3057	1.09( 0.92 - 1.29)
33149309	AA_DPA1_-26_33149309	0.9909	x	0.6656	0.6458	R	0.3057	1.09( 0.92 - 1.29)
33149312	AA_DPA1_-27_33149312	0.9909	x	0.6656	0.6458	D	0.3057	1.09( 0.92 - 1.29)
33149315	AA_DPA1_-28_33149315	0.9909	x	0.6656	0.6458	E	0.3057	1.09( 0.92 - 1.29)
33149318	AA_DPA1_-29_33149318	0.9909	P	0.3344	0.3542	x	0.3057	0.92( 0.77 - 1.08)
33149321	AA_DPA1_-30_33149321	0.9908	x	0.6656	0.6458	R	0.3057	1.09( 0.92 - 1.29)
33149324	AA_DPA1_-31_33149324	0.9906	x	0.6656	0.6458	M	0.3057	1.09( 0.92 - 1.29)
32717128	AA_DQA1_26_32717128	1.0135	S	0.2823	0.2642	T	0.3083	1.1( 0.92 - 1.31)
32717191	AA_DQA1_47_32717191_Q	1.0136	P	0.2823	0.2642	A	0.3083	1.1( 0.92 - 1.31)
32717218	AA_DQA1_56_32717218_R	1.0136	P	0.2823	0.2642	A	0.3083	1.1( 0.92 - 1.31)
32717278	AA_DQA1_76_32717278_V	1.0136	P	0.2823	0.2642	A	0.3083	1.1( 0.92 - 1.31)
32718380	AA_DQA1_187_32718380_A	1.0133	A	0.2823	0.2642	P	0.3083	1.1( 0.92 - 1.31)
32718380	AA_DQA1_187_32718380_T	1.0136	P	0.2823	0.2642	A	0.3083	1.1( 0.92 - 1.31)
31430282	AA_B_325_31430282_C	1.0043	P	0.4006	0.3809	A	0.3155	1.09( 0.92 - 1.28)
32660121	AA_DRB1_9_32660121_E	1.0076	P	0.5773	0.5572	A	0.3161	1.09( 0.92 - 1.27)
31430282	AA_B_325_31430282_S	0.9977	P	0.5994	0.6189	A	0.3212	0.92( 0.78 - 1.08)
31431300	AA_B_199_31431300_A	0.9041	A	0.02366	0.01826	P	0.3212	1.3( 0.77 - 2.20)
31431300	AA_B_199_31431300_V	0.932	P	0.02366	0.01826	A	0.3212	1.3( 0.77 - 2.20)
31431970	AA_B_167_31431970_S	0.8969	P	0.02366	0.01826	A	0.3212	1.3( 0.77 - 2.20)
31431970	AA_B_167_31431970_W	0.895	P	0.9763	0.9816	A	0.3328	0.77( 0.46 - 1.30)
31432189	AA_B_94_31432189	0.9788	I	0.2571	0.2404	T	0.3346	1.09( 0.91 - 1.31)
33160852	AA_DPB1_142_33160852	0.9246	S	0.9874	0.9823	x	0.3382	1.41( 0.70 - 2.86)
32657518	AA_DRB1_120_32657518_N	0.9965	P	0.1372	0.1244	A	0.3391	1.12( 0.89 - 1.41)
32660109	AA_DRB1_13_32660109_S	0.9141	P	0.224	0.2084	A	0.3419	1.1( 0.91 - 1.33)
32665481	AA_DRB1_-24_32665481_L	0.9757	P	0.8785	0.8904	A	0.3478	0.89( 0.70 - 1.14)
30018567	AA_A_19_30018567	0.9733	E	0.9858	0.9806	K	0.3488	1.37( 0.71 - 2.68)
31432467	AA_B_83_31432467	0.9996	R	0.3896	0.3713	G	0.3494	1.08( 0.92 - 1.27)
31432470	AA_B_82_31432470	1	L	0.3896	0.3713	R	0.3494	1.08( 0.92 - 1.27)
31432476	AA_B_80_31432476_N	0.9996	P	0.6104	0.6287	A	0.3494	0.93( 0.79 - 1.09)
32657518	AA_DRB1_120_32657518_S	0.9918	P	0.8628	0.8753	A	0.3503	0.9( 0.71 - 1.13)
33160705	AA_DPB1_93_33160705	0.926	V	0.9874	0.9825	x	0.3523	1.4( 0.69 - 2.83)
33160708	AA_DPB1_94_33160708	0.9248	Q	0.9874	0.9825	x	0.3523	1.4( 0.69 - 2.83)
33160711	AA_DPB1_95_33160711	0.9264	P	0.9874	0.9825	x	0.3523	1.4( 0.69 - 2.83)
33160714	AA_DPB1_96_33160714_x	0.9264	P	0.01262	0.01753	A	0.3523	0.72( 0.35 - 1.45)
33160717	AA_DPB1_97_33160717	0.9264	V	0.9874	0.9825	x	0.3523	1.4( 0.69 - 2.83)
33160720	AA_DPB1_98_33160720	0.9257	N	0.9874	0.9825	x	0.3523	1.4( 0.69 - 2.83)
33160723	AA_DPB1_99_33160723	0.9256	V	0.9874	0.9825	x	0.3523	1.4( 0.69 - 2.83)
33160726	AA_DPB1_100_33160726	0.9259	S	0.9874	0.9825	x	0.3523	1.4( 0.69 - 2.83)
33160729	AA_DPB1_101_33160729	0.9262	P	0.9874	0.9825	x	0.3523	1.4( 0.69 - 2.83)
33160732	AA_DPB1_102_33160732	0.9254	S	0.9874	0.9825	x	0.3523	1.4( 0.69 - 2.83)
33160735	AA_DPB1_103_33160735	0.9261	K	0.9874	0.9825	x	0.3523	1.4( 0.69 - 2.83)
33160738	AA_DPB1_104_33160738	0.9254	K	0.9874	0.9825	x	0.3523	1.4( 0.69 - 2.83)
33160741	AA_DPB1_105_33160741	0.9264	G	0.9874	0.9825	x	0.3523	1.4( 0.69 - 2.83)
33160744	AA_DPB1_106_33160744	0.9263	P	0.9874	0.9825	x	0.3523	1.4( 0.69 - 2.83)
33160747	AA_DPB1_107_33160747	0.9264	L	0.9874	0.9825	x	0.3523	1.4( 0.69 - 2.83)
33160750	AA_DPB1_108_33160750	0.9255	Q	0.9874	0.9825	x	0.3523	1.4( 0.69 - 2.83)
33160753	AA_DPB1_109_33160753	0.9264	H	0.9874	0.9825	x	0.3523	1.4( 0.69 - 2.83)
33160756	AA_DPB1_110_33160756	0.9264	H	0.9874	0.9825	x	0.3523	1.4( 0.69 - 2.83)
33160759	AA_DPB1_111_33160759	0.9254	N	0.9874	0.9825	x	0.3523	1.4( 0.69 - 2.83)
33160762	AA_DPB1_112_33160762	0.9264	L	0.9874	0.9825	x	0.3523	1.4( 0.69 - 2.83)
33160765	AA_DPB1_113_33160765	0.9249	L	0.9874	0.9825	x	0.3523	1.4( 0.69 - 2.83)
33160768	AA_DPB1_114_33160768	0.9261	V	0.9874	0.9825	x	0.3523	1.4( 0.69 - 2.83)
33160771	AA_DPB1_115_33160771	0.9264	C	0.9874	0.9825	x	0.3523	1.4( 0.69 - 2.83)
33160774	AA_DPB1_116_33160774	0.9262	H	0.9874	0.9825	x	0.3523	1.4( 0.69 - 2.83)
33160777	AA_DPB1_117_33160777	0.9262	V	0.9874	0.9825	x	0.3523	1.4( 0.69 - 2.83)
33160780	AA_DPB1_118_33160780	0.9264	T	0.9874	0.9825	x	0.3523	1.4( 0.69 - 2.83)
33160783	AA_DPB1_119_33160783	0.9248	D	0.9874	0.9825	x	0.3523	1.4( 0.69 - 2.83)
33160786	AA_DPB1_120_33160786	0.926	F	0.9874	0.9825	x	0.3523	1.4( 0.69 - 2.83)
33160789	AA_DPB1_121_33160789	0.9264	Y	0.9874	0.9825	x	0.3523	1.4( 0.69 - 2.83)
33160792	AA_DPB1_122_33160792	0.9264	P	0.9874	0.9825	x	0.3523	1.4( 0.69 - 2.83)
33160795	AA_DPB1_123_33160795	0.9264	G	0.9874	0.9825	x	0.3523	1.4( 0.69 - 2.83)
33160798	AA_DPB1_124_33160798	0.9255	S	0.9874	0.9825	x	0.3523	1.4( 0.69 - 2.83)
33160801	AA_DPB1_125_33160801	0.9264	I	0.9874	0.9825	x	0.3523	1.4( 0.69 - 2.83)
33160804	AA_DPB1_126_33160804	0.9264	Q	0.9874	0.9825	x	0.3523	1.4( 0.69 - 2.83)
33160807	AA_DPB1_127_33160807	0.9264	V	0.9874	0.9825	x	0.3523	1.4( 0.69 - 2.83)
33160810	AA_DPB1_128_33160810	0.9261	R	0.9874	0.9825	x	0.3523	1.4( 0.69 - 2.83)
33160813	AA_DPB1_129_33160813	0.9264	W	0.9874	0.9825	x	0.3523	1.4( 0.69 - 2.83)
33160816	AA_DPB1_130_33160816	0.9262	F	0.9874	0.9825	x	0.3523	1.4( 0.69 - 2.83)
33160819	AA_DPB1_131_33160819	0.9262	L	0.9874	0.9825	x	0.3523	1.4( 0.69 - 2.83)
33160822	AA_DPB1_132_33160822	0.9257	N	0.9874	0.9825	x	0.3523	1.4( 0.69 - 2.83)
33160825	AA_DPB1_133_33160825	0.9264	G	0.9874	0.9825	x	0.3523	1.4( 0.69 - 2.83)
33160828	AA_DPB1_134_33160828	0.9259	Q	0.9874	0.9825	x	0.3523	1.4( 0.69 - 2.83)
33160831	AA_DPB1_135_33160831	0.9264	E	0.9874	0.9825	x	0.3523	1.4( 0.69 - 2.83)
33160834	AA_DPB1_136_33160834	0.9264	E	0.9874	0.9825	x	0.3523	1.4( 0.69 - 2.83)
33160837	AA_DPB1_137_33160837	0.926	T	0.9874	0.9825	x	0.3523	1.4( 0.69 - 2.83)
33160840	AA_DPB1_138_33160840	0.9259	A	0.9874	0.9825	x	0.3523	1.4( 0.69 - 2.83)
33160843	AA_DPB1_139_33160843	0.9259	G	0.9874	0.9825	x	0.3523	1.4( 0.69 - 2.83)
33160846	AA_DPB1_140_33160846	0.9264	V	0.9874	0.9825	x	0.3523	1.4( 0.69 - 2.83)
33160849	AA_DPB1_141_33160849	0.9261	V	0.9874	0.9825	x	0.3523	1.4( 0.69 - 2.83)
33160855	AA_DPB1_143_33160855	0.9264	T	0.9874	0.9825	x	0.3523	1.4( 0.69 - 2.83)
33160858	AA_DPB1_144_33160858	0.9256	N	0.9874	0.9825	x	0.3523	1.4( 0.69 - 2.83)
33160861	AA_DPB1_145_33160861	0.9248	L	0.9874	0.9825	x	0.3523	1.4( 0.69 - 2.83)
33160864	AA_DPB1_146_33160864	0.9264	I	0.9874	0.9825	x	0.3523	1.4( 0.69 - 2.83)
33160867	AA_DPB1_147_33160867	0.9261	R	0.9874	0.9825	x	0.3523	1.4( 0.69 - 2.83)
33160870	AA_DPB1_148_33160870	0.9252	N	0.9874	0.9825	x	0.3523	1.4( 0.69 - 2.83)
33160873	AA_DPB1_149_33160873	0.9231	G	0.9874	0.9825	x	0.3523	1.4( 0.69 - 2.83)
33160876	AA_DPB1_150_33160876	0.9254	D	0.9874	0.9825	x	0.3523	1.4( 0.69 - 2.83)
33160879	AA_DPB1_151_33160879	0.9225	W	0.9874	0.9825	x	0.3523	1.4( 0.69 - 2.83)
33160882	AA_DPB1_152_33160882	0.9256	T	0.9874	0.9825	x	0.3523	1.4( 0.69 - 2.83)
33160885	AA_DPB1_153_33160885	0.9262	F	0.9874	0.9825	x	0.3523	1.4( 0.69 - 2.83)
33160888	AA_DPB1_154_33160888	0.9264	Q	0.9874	0.9825	x	0.3523	1.4( 0.69 - 2.83)
33160891	AA_DPB1_155_33160891	0.9262	I	0.9874	0.9825	x	0.3523	1.4( 0.69 - 2.83)
33160894	AA_DPB1_156_33160894	0.9263	L	0.9874	0.9825	x	0.3523	1.4( 0.69 - 2.83)
33160897	AA_DPB1_157_33160897	0.9261	V	0.9874	0.9825	x	0.3523	1.4( 0.69 - 2.83)
33160900	AA_DPB1_158_33160900	0.9264	M	0.9874	0.9825	x	0.3523	1.4( 0.69 - 2.83)
33160903	AA_DPB1_159_33160903	0.9264	L	0.9874	0.9825	x	0.3523	1.4( 0.69 - 2.83)
33160906	AA_DPB1_160_33160906	0.9264	E	0.9874	0.9825	x	0.3523	1.4( 0.69 - 2.83)
33160909	AA_DPB1_161_33160909	0.9259	M	0.9874	0.9825	x	0.3523	1.4( 0.69 - 2.83)
33160912	AA_DPB1_162_33160912	0.9264	T	0.9874	0.9825	x	0.3523	1.4( 0.69 - 2.83)
33160915	AA_DPB1_163_33160915	0.9235	P	0.9874	0.9825	x	0.3523	1.4( 0.69 - 2.83)
33160918	AA_DPB1_164_33160918	0.9262	Q	0.9874	0.9825	x	0.3523	1.4( 0.69 - 2.83)
33160921	AA_DPB1_165_33160921	0.9255	Q	0.9874	0.9825	x	0.3523	1.4( 0.69 - 2.83)
33160924	AA_DPB1_166_33160924	0.9264	G	0.9874	0.9825	x	0.3523	1.4( 0.69 - 2.83)
33160927	AA_DPB1_167_33160927	0.924	D	0.9874	0.9825	x	0.3523	1.4( 0.69 - 2.83)
33160930	AA_DPB1_168_33160930	0.9262	V	0.9874	0.9825	x	0.3523	1.4( 0.69 - 2.83)
33160936	AA_DPB1_170_33160936_x	0.9248	P	0.01262	0.01753	A	0.3523	0.72( 0.35 - 1.45)
33160939	AA_DPB1_171_33160939	0.9263	C	0.9874	0.9825	x	0.3523	1.4( 0.69 - 2.83)
33160942	AA_DPB1_172_33160942	0.9258	Q	0.9874	0.9825	x	0.3523	1.4( 0.69 - 2.83)
33160945	AA_DPB1_173_33160945	0.9254	V	0.9874	0.9825	x	0.3523	1.4( 0.69 - 2.83)
33160948	AA_DPB1_174_33160948	0.9251	E	0.9874	0.9825	x	0.3523	1.4( 0.69 - 2.83)
33160951	AA_DPB1_175_33160951	0.9264	H	0.9874	0.9825	x	0.3523	1.4( 0.69 - 2.83)
33160954	AA_DPB1_176_33160954	0.9264	T	0.9874	0.9825	x	0.3523	1.4( 0.69 - 2.83)
33160957	AA_DPB1_177_33160957	0.9266	S	0.9874	0.9825	x	0.3523	1.4( 0.69 - 2.83)
33160960	AA_DPB1_178_33160960_x	0.9233	P	0.01262	0.01753	A	0.3523	0.72( 0.35 - 1.45)
33160963	AA_DPB1_179_33160963	0.9239	D	0.9874	0.9825	x	0.3523	1.4( 0.69 - 2.83)
33160966	AA_DPB1_180_33160966	0.9238	S	0.9874	0.9825	x	0.3523	1.4( 0.69 - 2.83)
33160969	AA_DPB1_181_33160969	0.9233	P	0.9874	0.9825	x	0.3523	1.4( 0.69 - 2.83)
33160972	AA_DPB1_182_33160972	0.9236	V	0.9874	0.9825	x	0.3523	1.4( 0.69 - 2.83)
33160975	AA_DPB1_183_33160975	0.9237	T	0.9874	0.9825	x	0.3523	1.4( 0.69 - 2.83)
33160978	AA_DPB1_184_33160978	0.9237	V	0.9874	0.9825	x	0.3523	1.4( 0.69 - 2.83)
33160981	AA_DPB1_185_33160981	0.9236	E	0.9874	0.9825	x	0.3523	1.4( 0.69 - 2.83)
33160984	AA_DPB1_186_33160984	0.9231	W	0.9874	0.9825	x	0.3523	1.4( 0.69 - 2.83)
31346909	AA_C_156_31346909_L	0.9969	P	0.5347	0.5534	A	0.3528	0.93( 0.79 - 1.09)
31345754	AA_C_304_31345754_V	1.01	P	0.7145	0.6973	A	0.3546	1.09( 0.91 - 1.29)
33156517	AA_DPB1_35_33156517_F	1.0102	P	0.4653	0.4839	A	0.356	0.93( 0.79 - 1.09)
31345754	AA_C_304_31345754_M	1.0096	P	0.2855	0.3024	A	0.3609	0.92( 0.77 - 1.10)
33156583	AA_DPB1_57_33156583	0.9613	D	0.1388	0.1267	E	0.3692	1.11( 0.88 - 1.40)
32742319	AA_DQB1_-18_32742319_V	0.973	P	0.5174	0.5353	A	0.3723	0.93( 0.79 - 1.09)
31346208	AA_C_194_31346208_L	0.9907	P	0.1893	0.1756	A	0.3751	1.1( 0.90 - 1.34)
31346238	AA_C_184_31346238_P	0.991	P	0.1893	0.1756	A	0.3751	1.1( 0.90 - 1.34)
31346936	AA_C_147_31346936	0.9905	L	0.1893	0.1756	W	0.3751	1.1( 0.90 - 1.34)
30019219	AA_A_156_30019219_Q	0.9997	P	0.4038	0.3864	A	0.3758	1.08( 0.92 - 1.26)
31346208	AA_C_194_31346208_V	0.9852	P	0.8107	0.8243	A	0.3772	0.91( 0.75 - 1.12)
31346238	AA_C_184_31346238_H	0.9849	P	0.8107	0.8243	A	0.3772	0.91( 0.75 - 1.12)
30018729	AA_A_73_30018729	0.9915	I	0.1278	0.1163	T	0.3775	1.11( 0.88 - 1.41)
32660049	AA_DRB1_33_32660049	1.0006	H	0.1199	0.1088	N	0.3791	1.12( 0.87 - 1.43)
32660109	AA_DRB1_13_32660109_H	1.0006	P	0.1199	0.1088	A	0.3791	1.12( 0.87 - 1.43)
32665481	AA_DRB1_-24_32665481_F	1.0004	P	0.1199	0.1088	A	0.3791	1.12( 0.87 - 1.43)
32717218	AA_DQA1_56_32717218_x	1.0114	P	0.3738	0.3568	A	0.3791	1.08( 0.91 - 1.27)
32717278	AA_DQA1_76_32717278_L	1.0116	P	0.3738	0.3568	A	0.3791	1.08( 0.91 - 1.27)
32660037	AA_DRB1_37_32660037_Y	0.9437	P	0.2603	0.2452	A	0.3859	1.08( 0.90 - 1.30)
31430889	AA_B_305_31430889_A	0.9884	P	0.459	0.4416	A	0.3861	1.07( 0.92 - 1.26)
30019042	AA_A_97_30019042_I	1.0043	P	0.3628	0.3463	A	0.3907	1.08( 0.91 - 1.27)
31430889	AA_B_305_31430889_T	0.9827	P	0.541	0.5582	A	0.3908	0.93( 0.80 - 1.09)
31346888	AA_C_163_31346888_T	1.0056	P	0.7823	0.7678	A	0.3953	1.09( 0.90 - 1.32)
31346858	AA_C_173_31346858	1.0073	E	0.7823	0.7679	K	0.3971	1.09( 0.90 - 1.32)
31346888	AA_C_163_31346888_L	1.0076	P	0.2177	0.2321	A	0.3971	0.92( 0.76 - 1.12)
31347068	AA_C_103_31347068	1.0073	L	0.7823	0.7679	V	0.3971	1.09( 0.90 - 1.32)
30018699	AA_A_63_30018699_E	1.0027	P	0.8628	0.8741	A	0.3974	0.91( 0.72 - 1.14)
33161588	AA_DPB1_205_33161588_V	0.9834	P	0.5331	0.5501	A	0.3987	0.93( 0.80 - 1.10)
32660034	AA_DRB1_38_32660034_V	0.9358	P	0.8644	0.8524	A	0.4027	1.1( 0.88 - 1.39)
30019207	AA_A_152_30019207_A	1.0101	P	0.2713	0.2566	A	0.4051	1.08( 0.90 - 1.29)
32717173	AA_DQA1_41_32717173	1.002	R	0.9148	0.905	K	0.4067	1.13( 0.85 - 1.50)
32717853	AA_DQA1_130_32717853_S	1.002	P	0.9148	0.905	A	0.4067	1.13( 0.85 - 1.50)
31347095	AA_C_94_31347095	0.9828	T	0.7334	0.7184	I	0.4068	1.08( 0.90 - 1.29)
31432515	AA_B_67_31432515_C	0.935	P	0.06782	0.07673	A	0.407	0.88( 0.64 - 1.20)
32660070	AA_DRB1_26_32660070_L	0.9424	P	0.153	0.1654	A	0.4089	0.91( 0.73 - 1.14)
32656010	AA_DRB1_231_32656010_Q	0.9094	P	0.9811	0.9851	A	0.4091	0.78( 0.44 - 1.40)
32657338	AA_DRB1_180_32657338_V	0.9866	P	0.8785	0.889	A	0.4107	0.9( 0.71 - 1.15)
31432473	AA_B_81_31432473	1.0074	A	0.3644	0.3485	L	0.4113	1.07( 0.91 - 1.26)
31432485	AA_B_77_31432485_N	1.0029	P	0.3644	0.3485	A	0.4113	1.07( 0.91 - 1.26)
32717853	AA_DQA1_130_32717853_A	1.0021	P	0.08517	0.09488	A	0.4119	0.89( 0.67 - 1.18)
31432476	AA_B_80_31432476_T	0.9761	P	0.2145	0.2013	A	0.4171	1.08( 0.89 - 1.31)
30018537	AA_A_9_30018537_F	1.0046	P	0.3076	0.3229	A	0.4185	0.93( 0.78 - 1.11)
31432904	AA_B_-21_31432904_T	1.0092	P	0.8817	0.8709	A	0.4254	1.11( 0.86 - 1.41)
31432910	AA_B_-23_31432910_R	1.0089	P	0.8817	0.8709	A	0.4254	1.11( 0.86 - 1.41)
31347594	AA_C_11_31347594	1.0274	S	0.2934	0.2789	A	0.4255	1.07( 0.90 - 1.28)
32657542	AA_DRB1_112_32657542_Y	0.822	P	0.02997	0.02493	A	0.4261	1.21( 0.76 - 1.93)
31345102	AA_C_339_31345102_T	0.9986	P	0.1861	0.1739	A	0.4264	1.09( 0.89 - 1.33)
31345141	AA_C_326_31345141_C	1.0001	P	0.1861	0.1739	A	0.4264	1.09( 0.89 - 1.33)
31345745	AA_C_307_31345745_M	1.0001	P	0.1861	0.1739	A	0.4264	1.09( 0.89 - 1.33)
31345748	AA_C_306_31345748_A	1.0001	P	0.1861	0.1739	A	0.4264	1.09( 0.89 - 1.33)
31345751	AA_C_305_31345751_T	1.0001	P	0.1861	0.1739	A	0.4264	1.09( 0.89 - 1.33)
31345781	AA_C_295_31345781_V	1.0001	P	0.1861	0.1739	A	0.4264	1.09( 0.89 - 1.33)
31345811	AA_C_285_31345811_M	1.0001	P	0.1861	0.1739	A	0.4264	1.09( 0.89 - 1.33)
31345971	AA_C_273_31345971_S	0.9999	P	0.1861	0.1739	A	0.4264	1.09( 0.89 - 1.33)
31345989	AA_C_267_31345989_Q	1.0001	P	0.1861	0.1739	A	0.4264	1.09( 0.89 - 1.33)
31346007	AA_C_261_31346007_M	1.0001	P	0.1861	0.1739	A	0.4264	1.09( 0.89 - 1.33)
31346031	AA_C_253_31346031_Q	1.0001	P	0.1861	0.1739	A	0.4264	1.09( 0.89 - 1.33)
31432123	AA_B_116_31432123_S	0.9865	P	0.3407	0.356	A	0.4276	0.93( 0.79 - 1.11)
31432593	AA_B_41_31432593	0.9961	T	0.3328	0.3179	A	0.4297	1.07( 0.90 - 1.27)
31346921	AA_C_152_31346921_A	0.9901	P	0.1893	0.1771	A	0.4301	1.09( 0.89 - 1.33)
31432910	AA_B_-23_31432910_L	1.0117	P	0.1183	0.129	A	0.4301	0.91( 0.71 - 1.16)
32659926	AA_DRB1_74_32659926_E	0.9648	P	0.2792	0.2651	A	0.4311	1.07( 0.90 - 1.28)
31432904	AA_B_-21_31432904_M	1.0108	P	0.1183	0.1289	A	0.4325	0.91( 0.71 - 1.16)
30018537	AA_A_9_30018537_S	1.0216	P	0.2334	0.2203	A	0.4328	1.08( 0.89 - 1.30)
31345102	AA_C_339_31345102_A	0.9995	A	0.1861	0.1741	P	0.4353	1.08( 0.88 - 1.33)
31345141	AA_C_326_31345141_S	0.9996	P	0.8139	0.8259	A	0.4353	0.92( 0.75 - 1.13)
31345745	AA_C_307_31345745_V	0.9996	P	0.8139	0.8259	A	0.4353	0.92( 0.75 - 1.13)
31345748	AA_C_306_31345748_V	0.9995	P	0.8139	0.8259	A	0.4353	0.92( 0.75 - 1.13)
31345751	AA_C_305_31345751_A	0.9995	A	0.1861	0.1741	P	0.4353	1.08( 0.88 - 1.33)
31345781	AA_C_295_31345781_A	0.9996	A	0.1861	0.1741	P	0.4353	1.08( 0.88 - 1.33)
31345811	AA_C_285_31345811_V	0.9996	P	0.8139	0.8259	A	0.4353	0.92( 0.75 - 1.13)
31345971	AA_C_273_31345971_R	0.9995	P	0.8139	0.8259	A	0.4353	0.92( 0.75 - 1.13)
31345989	AA_C_267_31345989_P	0.9995	P	0.8139	0.8259	A	0.4353	0.92( 0.75 - 1.13)
31346007	AA_C_261_31346007_V	0.9996	P	0.8139	0.8259	A	0.4353	0.92( 0.75 - 1.13)
31346031	AA_C_253_31346031_E	0.9994	P	0.8139	0.8259	A	0.4353	0.92( 0.75 - 1.13)
31347396	AA_C_77_31347396	1.0085	N	0.2177	0.2052	S	0.4451	1.08( 0.89 - 1.31)
31347781	AA_C_-9_31347781_A	0.9861	A	0.1861	0.1744	P	0.4465	1.08( 0.88 - 1.33)
31347781	AA_C_-9_31347781_G	0.9949	P	0.1861	0.1744	A	0.4465	1.08( 0.88 - 1.33)
31347805	AA_C_-17_31347805_T	0.9995	P	0.8139	0.8256	A	0.4465	0.92( 0.75 - 1.13)
31347805	AA_C_-17_31347805_A	1.0002	P	0.1861	0.1744	A	0.4465	1.08( 0.88 - 1.33)
31347387	AA_C_80_31347387	1.0086	K	0.2177	0.2052	N	0.4472	1.08( 0.89 - 1.31)
31432123	AA_B_116_31432123_D	0.993	P	0.03943	0.0458	A	0.4501	0.86( 0.57 - 1.28)
32742268	AA_DQB1_-1_32742268	0.8821	G	0.9874	0.9835	x	0.4539	1.31( 0.65 - 2.65)
32742271	AA_DQB1_-2_32742271	0.8777	E	0.9874	0.9835	x	0.4539	1.31( 0.65 - 2.65)
32742274	AA_DQB1_-3_32742274	0.8805	A	0.9874	0.9835	x	0.4539	1.31( 0.65 - 2.65)
32742277	AA_DQB1_-4_32742277_x	0.8825	P	0.01262	0.01645	A	0.4539	0.76( 0.38 - 1.55)
32742280	AA_DQB1_-5_32742280_x	0.8825	P	0.01262	0.01645	A	0.4539	0.76( 0.38 - 1.55)
32742283	AA_DQB1_-6_32742283_x	0.8825	P	0.01262	0.01645	A	0.4539	0.76( 0.38 - 1.55)
32742286	AA_DQB1_-7_32742286	0.8825	S	0.9874	0.9835	x	0.4539	1.31( 0.65 - 2.65)
32742289	AA_DQB1_-8_32742289	0.8825	L	0.9874	0.9835	x	0.4539	1.31( 0.65 - 2.65)
32742292	AA_DQB1_-9_32742292_x	0.8823	P	0.01262	0.01645	A	0.4539	0.76( 0.38 - 1.55)
32742295	AA_DQB1_-10_32742295_x	0.8825	P	0.01262	0.01645	A	0.4539	0.76( 0.38 - 1.55)
32742298	AA_DQB1_-11_32742298	0.8826	L	0.9874	0.9835	x	0.4539	1.31( 0.65 - 2.65)
32742301	AA_DQB1_-12_32742301	0.8825	M	0.9874	0.9835	x	0.4539	1.31( 0.65 - 2.65)
32742304	AA_DQB1_-13_32742304	0.8825	L	0.9874	0.9835	x	0.4539	1.31( 0.65 - 2.65)
32742307	AA_DQB1_-14_32742307	0.8825	T	0.9874	0.9835	x	0.4539	1.31( 0.65 - 2.65)
32742310	AA_DQB1_-15_32742310	0.8823	V	0.9874	0.9835	x	0.4539	1.31( 0.65 - 2.65)
32742313	AA_DQB1_-16_32742313	0.8822	T	0.9874	0.9835	x	0.4539	1.31( 0.65 - 2.65)
32742316	AA_DQB1_-17_32742316_x	0.8822	P	0.01262	0.01645	A	0.4539	0.76( 0.38 - 1.55)
32742319	AA_DQB1_-18_32742319_x	0.8825	P	0.01262	0.01645	A	0.4539	0.76( 0.38 - 1.55)
32742322	AA_DQB1_-19_32742322	0.8824	R	0.9874	0.9835	x	0.4539	1.31( 0.65 - 2.65)
32742325	AA_DQB1_-20_32742325	0.8823	L	0.9874	0.9835	x	0.4539	1.31( 0.65 - 2.65)
32742328	AA_DQB1_-21_32742328_x	0.8825	P	0.01262	0.01645	A	0.4539	0.76( 0.38 - 1.55)
32742331	AA_DQB1_-22_32742331	0.8825	G	0.9874	0.9835	x	0.4539	1.31( 0.65 - 2.65)
32742334	AA_DQB1_-23_32742334	0.8825	P	0.9874	0.9835	x	0.4539	1.31( 0.65 - 2.65)
32742337	AA_DQB1_-24_32742337	0.8825	I	0.9874	0.9835	x	0.4539	1.31( 0.65 - 2.65)
32742340	AA_DQB1_-25_32742340	0.8825	R	0.9874	0.9835	x	0.4539	1.31( 0.65 - 2.65)
32742343	AA_DQB1_-26_32742343	0.8824	L	0.9874	0.9835	x	0.4539	1.31( 0.65 - 2.65)
30020259	AA_A_276_30020259_P	1.0013	P	0.6404	0.6548	A	0.4546	0.94( 0.80 - 1.11)
30020259	AA_A_276_30020259_L	1.003	P	0.3596	0.3452	A	0.4546	1.07( 0.90 - 1.26)
30020836	AA_A_321_30020836_S	1.002	P	0.6404	0.6548	A	0.4546	0.94( 0.80 - 1.11)
30020836	AA_A_321_30020836_T	1.003	P	0.3596	0.3452	A	0.4546	1.07( 0.90 - 1.26)
32657542	AA_DRB1_112_32657542_H	0.8122	P	0.97	0.9748	A	0.4549	0.84( 0.53 - 1.34)
31432030	AA_B_147_31432030	1.0161	L	0.142	0.1317	W	0.4555	1.09( 0.87 - 1.37)
31432042	AA_B_143_31432042	1.0155	S	0.142	0.1317	T	0.4555	1.09( 0.87 - 1.37)
32742346	AA_DQB1_-27_32742346_x	0.8822	P	0.01262	0.0164	A	0.4599	0.77( 0.38 - 1.56)
32742349	AA_DQB1_-28_32742349	0.8827	K	0.9874	0.9836	x	0.4599	1.3( 0.64 - 2.65)
32742352	AA_DQB1_-29_32742352	0.8827	K	0.9874	0.9836	x	0.4599	1.3( 0.64 - 2.65)
32742355	AA_DQB1_-30_32742355	0.8827	W	0.9874	0.9836	x	0.4599	1.3( 0.64 - 2.65)
32742358	AA_DQB1_-31_32742358	0.8827	S	0.9874	0.9836	x	0.4599	1.3( 0.64 - 2.65)
32742361	AA_DQB1_-32_32742361	0.8827	M	0.9874	0.9836	x	0.4599	1.3( 0.64 - 2.65)
32717257	AA_DQA1_69_32717257_T	0.9913	P	0.08833	0.09714	A	0.4611	0.9( 0.68 - 1.19)
32657338	AA_DRB1_180_32657338_L	0.9953	P	0.1199	0.1105	A	0.462	1.1( 0.86 - 1.40)
32657590	AA_DRB1_96_32657590_Y	0.9953	P	0.1199	0.1105	A	0.462	1.1( 0.86 - 1.40)
30019093	AA_A_114_30019093_Q	0.9865	P	0.1498	0.1607	A	0.4644	0.92( 0.74 - 1.15)
31430958	AA_B_282_31430958_V	0.9859	P	0.4495	0.435	A	0.4678	1.06( 0.90 - 1.24)
32657380	AA_DRB1_166_32657380_Q	1.0016	P	0.01735	0.01391	A	0.4692	1.25( 0.68 - 2.30)
32660028	AA_DRB1_40_32660028	1.0015	Y	0.01735	0.01391	F	0.4692	1.25( 0.68 - 2.30)
32660034	AA_DRB1_38_32660034_A	1.0016	P	0.01735	0.01391	A	0.4692	1.25( 0.68 - 2.30)
32660055	AA_DRB1_31_32660055_V	1.0005	P	0.01735	0.01391	A	0.4692	1.25( 0.68 - 2.30)
32660058	AA_DRB1_30_32660058_R	1.0016	P	0.01735	0.01391	A	0.4692	1.25( 0.68 - 2.30)
32660118	AA_DRB1_10_32660118_E	1.0015	P	0.01735	0.01391	A	0.4692	1.25( 0.68 - 2.30)
31430958	AA_B_282_31430958_I	0.9799	P	0.5505	0.5649	A	0.4731	0.94( 0.80 - 1.11)
33156640	AA_DPB1_76_33156640_I	0.958	P	0.07098	0.06389	A	0.4743	1.12( 0.82 - 1.53)
32740768	AA_DQB1_23_32740768	0.9518	R	0.9637	0.9579	L	0.4745	1.17( 0.76 - 1.78)
32742283	AA_DQB1_-6_32742283_A	0.9518	P	0.03628	0.04207	A	0.4745	0.86( 0.56 - 1.31)
31345841	AA_C_275_31345841_K	0.9911	P	0.06151	0.06881	A	0.475	0.89( 0.64 - 1.23)
30018642	AA_A_44_30018642	1.0122	R	0.9716	0.9665	K	0.479	1.19( 0.74 - 1.91)
30018711	AA_A_67_30018711	1.0123	V	0.9716	0.9665	M	0.479	1.19( 0.74 - 1.91)
30019201	AA_A_150_30019201	1.0117	A	0.9716	0.9665	V	0.479	1.19( 0.74 - 1.91)
30019219	AA_A_156_30019219_R	1.0091	P	0.02839	0.03353	A	0.479	0.84( 0.52 - 1.36)
30019225	AA_A_158_30019225	1.0098	A	0.9716	0.9665	V	0.479	1.19( 0.74 - 1.91)
32717206	AA_DQA1_52_32717206_R	1.0355	P	0.5457	0.5316	A	0.4834	1.06( 0.90 - 1.24)
30020088	AA_A_253_30020088_Q	0.9874	P	0.4763	0.4903	A	0.4887	0.95( 0.81 - 1.11)
30020088	AA_A_253_30020088_E	0.9873	P	0.5237	0.5097	A	0.4887	1.06( 0.90 - 1.24)
30020313	AA_A_294_30020313_F	0.9862	P	0.4763	0.4903	A	0.4887	0.95( 0.81 - 1.11)
30020313	AA_A_294_30020313_L	0.9878	P	0.5237	0.5097	A	0.4887	1.06( 0.90 - 1.24)
32660100	AA_DRB1_16_32660100_H	0.9417	P	0.7681	0.7562	A	0.491	1.07( 0.89 - 1.29)
32656010	AA_DRB1_231_32656010_P	0.9861	P	0.01735	0.01408	A	0.4938	1.24( 0.67 - 2.27)
30018537	AA_A_9_30018537_Y	1.0075	P	0.3202	0.3329	A	0.5038	0.94( 0.80 - 1.12)
30018350	AA_A_-11_30018350_L	0.9951	P	0.1467	0.1375	A	0.5074	1.08( 0.86 - 1.35)
32740666	AA_DQB1_57_32740666_V	1.003	P	0.08202	0.07497	A	0.5088	1.1( 0.83 - 1.47)
30018350	AA_A_-11_30018350_S	0.9886	P	0.8533	0.8625	A	0.5101	0.93( 0.74 - 1.16)
32657380	AA_DRB1_166_32657380_R	0.966	P	0.9826	0.9858	A	0.5105	0.82( 0.44 - 1.50)
31431162	AA_B_245_31431162_A	0.9602	P	0.9732	0.9686	A	0.5111	1.18( 0.72 - 1.92)
31347600	AA_C_9_31347600_S	1.0058	P	0.1073	0.1157	A	0.5139	0.92( 0.71 - 1.19)
31432644	AA_B_24_31432644_T	0.9989	P	0.3407	0.3283	A	0.5153	1.06( 0.89 - 1.25)
31432578	AA_B_46_31432578	0.988	E	0.664	0.6516	A	0.5179	1.06( 0.89 - 1.25)
31432581	AA_B_45_31432581_M	0.988	P	0.336	0.3484	A	0.5179	0.95( 0.80 - 1.12)
31432506	AA_B_70_31432506_K	0.921	P	0.007886	0.01052	A	0.5217	0.75( 0.31 - 1.82)
31431982	AA_B_163_31431982_E	1.0001	P	0.3565	0.3443	A	0.526	1.06( 0.89 - 1.25)
33160933	AA_DPB1_169_33160933	0.9245	Y	0.9858	0.9825	x	0.5285	1.24( 0.64 - 2.42)
31431264	AA_B_211_31431264_A	0.9183	P	0.9921	0.9895	A	0.5297	1.33( 0.55 - 3.24)
31431264	AA_B_211_31431264_G	0.921	P	0.007886	0.01046	A	0.5297	0.75( 0.31 - 1.84)
31432180	AA_B_97_31432180_N	0.901	P	0.007886	0.01046	A	0.5297	0.75( 0.31 - 1.84)
32659926	AA_DRB1_74_32659926_L	0.9937	P	0.07729	0.07079	A	0.5315	1.1( 0.82 - 1.48)
32659938	AA_DRB1_70_32659938_Q	0.997	P	0.3155	0.3273	A	0.5335	0.95( 0.80 - 1.12)
30020325	AA_A_298_30020325_I	0.9909	P	0.8533	0.862	A	0.5345	0.93( 0.74 - 1.17)
30020325	AA_A_298_30020325_F	0.9939	P	0.1467	0.138	A	0.5345	1.07( 0.86 - 1.34)
30020352	AA_A_307_30020352_M	0.9907	P	0.8533	0.862	A	0.5345	0.93( 0.74 - 1.17)
30020352	AA_A_307_30020352_R	0.9936	P	0.1467	0.138	A	0.5345	1.07( 0.86 - 1.34)
31431162	AA_B_245_31431162_T	0.9786	P	0.02681	0.03115	A	0.5355	0.86( 0.53 - 1.40)
30018696	AA_A_62_30018696_R	1.0012	P	0.1262	0.1181	A	0.5368	1.08( 0.85 - 1.37)
30018699	AA_A_63_30018699_N	1.0005	P	0.1262	0.1181	A	0.5368	1.08( 0.85 - 1.37)
31431931	AA_B_180_31431931	1.0137	E	0.1782	0.1689	Q	0.5401	1.07( 0.87 - 1.31)
31431940	AA_B_177_31431940	1.0137	D	0.1782	0.1689	E	0.5401	1.07( 0.87 - 1.31)
32660100	AA_DRB1_16_32660100_Y	0.9325	P	0.2161	0.2261	A	0.5531	0.94( 0.78 - 1.14)
32660109	AA_DRB1_13_32660109_G	0.9325	P	0.2161	0.2261	A	0.5531	0.94( 0.78 - 1.14)
33156439	AA_DPB1_9_33156439_Y	0.9305	P	0.1262	0.1185	A	0.5545	1.08( 0.85 - 1.37)
32737733	AA_DQB1_185_32737733_T	0.9876	P	0.7145	0.725	A	0.5599	0.95( 0.80 - 1.13)
32737733	AA_DQB1_185_32737733_I	0.9895	P	0.2855	0.275	A	0.5599	1.05( 0.88 - 1.26)
32659935	AA_DRB1_71_32659935_E	0.9959	P	0.04101	0.04591	A	0.5616	0.89( 0.60 - 1.32)
32660070	AA_DRB1_26_32660070_F	0.9726	P	0.6246	0.6358	A	0.5645	0.95( 0.81 - 1.12)
32740627	AA_DQB1_70_32740627_E	0.9846	P	0.05047	0.05581	A	0.5648	0.9( 0.63 - 1.29)
30019908	AA_A_193_30019908_A	0.9842	P	0.4795	0.4911	A	0.565	0.95( 0.81 - 1.12)
30019908	AA_A_193_30019908_P	0.9843	P	0.5205	0.5089	A	0.565	1.05( 0.89 - 1.23)
30019911	AA_A_194_30019911_V	0.9842	P	0.4795	0.4911	A	0.565	0.95( 0.81 - 1.12)
30019911	AA_A_194_30019911_I	0.9843	P	0.5205	0.5089	A	0.565	1.05( 0.89 - 1.23)
30019950	AA_A_207_30019950_S	0.9842	P	0.4795	0.4911	A	0.565	0.95( 0.81 - 1.12)
30019950	AA_A_207_30019950_G	0.9843	P	0.5205	0.5089	A	0.565	1.05( 0.89 - 1.23)
32656611	AA_DRB1_189_32656611_R	0.9839	P	0.9227	0.9287	A	0.5654	0.92( 0.68 - 1.23)
30018708	AA_A_66_30018708	1.0162	N	0.5331	0.5215	K	0.5663	1.05( 0.89 - 1.23)
31347564	AA_C_21_31347564	0.9798	R	0.7129	0.7024	H	0.5693	1.05( 0.88 - 1.25)
31432003	AA_B_156_31432003_R	1.0154	P	0.02524	0.02906	A	0.5723	0.86( 0.52 - 1.43)
33156640	AA_DPB1_76_33156640_V	0.9568	P	0.08517	0.09171	A	0.5748	0.92( 0.69 - 1.22)
31432180	AA_B_97_31432180_R	1.0185	P	0.6073	0.6181	A	0.5803	0.96( 0.81 - 1.12)
30018738	AA_A_76_30018738_E	1.0106	P	0.1688	0.1773	A	0.5821	0.94( 0.76 - 1.16)
30018747	AA_A_79_30018747	1.0104	G	0.8312	0.8227	R	0.5821	1.06( 0.86 - 1.31)
30018750	AA_A_80_30018750	1.0104	T	0.8312	0.8227	I	0.5821	1.06( 0.86 - 1.31)
30018753	AA_A_81_30018753	1.0105	L	0.8312	0.8227	A	0.5821	1.06( 0.86 - 1.31)
30018756	AA_A_82_30018756	1.0104	R	0.8312	0.8227	L	0.5821	1.06( 0.86 - 1.31)
30018759	AA_A_83_30018759	1.0105	G	0.8312	0.8227	R	0.5821	1.06( 0.86 - 1.31)
33156619	AA_DPB1_69_33156619_E	0.9479	P	0.3943	0.405	A	0.5901	0.96( 0.81 - 1.13)
33156619	AA_DPB1_69_33156619_K	0.9468	P	0.6057	0.595	A	0.5901	1.05( 0.89 - 1.23)
32737868	AA_DQB1_140_32737868_A	0.9904	P	0.489	0.4782	A	0.5952	1.04( 0.89 - 1.22)
32659977	AA_DRB1_57_32659977_D	0.964	P	0.4558	0.4665	A	0.5979	0.96( 0.82 - 1.12)
33144977	AA_DPA1_111_33144977	0.9817	R	0.6356	0.6254	K	0.6007	1.05( 0.89 - 1.23)
32737742	AA_DQB1_182_32737742_N	0.9922	P	0.511	0.5216	A	0.6011	0.96( 0.82 - 1.12)
32737742	AA_DQB1_182_32737742_S	0.9902	P	0.489	0.4784	A	0.6011	1.04( 0.89 - 1.22)
32737868	AA_DQB1_140_32737868_T	0.9922	P	0.511	0.5216	A	0.6011	0.96( 0.82 - 1.12)
30020067	AA_A_246_30020067_A	0.9968	P	0.8391	0.8312	A	0.6018	1.06( 0.85 - 1.31)
30020067	AA_A_246_30020067_S	0.9984	P	0.1609	0.1688	A	0.6018	0.94( 0.76 - 1.17)
30020328	AA_A_299_30020328_T	0.9957	P	0.8391	0.8312	A	0.6018	1.06( 0.85 - 1.31)
30020328	AA_A_299_30020328_A	0.9983	P	0.1609	0.1688	A	0.6018	0.94( 0.76 - 1.17)
30021017	AA_A_334_30021017_V	0.996	P	0.8391	0.8312	A	0.6018	1.06( 0.85 - 1.31)
30021017	AA_A_334_30021017_M	0.9983	P	0.1609	0.1688	A	0.6018	0.94( 0.76 - 1.17)
32656611	AA_DRB1_189_32656611_S	1.0009	P	0.07571	0.07034	A	0.6037	1.08( 0.80 - 1.46)
32740747	AA_DQB1_30_32740747_H	0.9943	P	0.1672	0.1751	A	0.606	0.95( 0.76 - 1.17)
32737898	AA_DQB1_130_32737898_R	0.991	P	0.9653	0.9689	A	0.6084	0.89( 0.58 - 1.38)
32737898	AA_DQB1_130_32737898_Q	1.006	P	0.0347	0.0311	A	0.6084	1.12( 0.73 - 1.73)
32740579	AA_DQB1_86_32740579_G	1.0043	P	0.0347	0.0311	A	0.6084	1.12( 0.73 - 1.73)
33145557	AA_DPA1_31_33145557	0.9824	Q	0.6356	0.6257	M	0.6108	1.04( 0.89 - 1.23)
32657431	AA_DRB1_149_32657431_H	0.9957	P	0.4401	0.4301	A	0.6191	1.04( 0.89 - 1.22)
32740624	AA_DQB1_71_32740624_D	0.9874	P	0.05047	0.05502	A	0.6217	0.91( 0.64 - 1.31)
32740669	AA_DQB1_56_32740669	0.9881	P	0.9495	0.945	L	0.6217	1.1( 0.76 - 1.57)
32657590	AA_DRB1_96_32657590_E	1.0129	P	0.02208	0.01934	A	0.6228	1.15( 0.67 - 1.97)
32660058	AA_DRB1_30_32660058_C	1.0122	P	0.02208	0.01934	A	0.6228	1.15( 0.67 - 1.97)
32660115	AA_DRB1_11_32660115_L	1.0123	P	0.02208	0.01934	A	0.6228	1.15( 0.67 - 1.97)
32657431	AA_DRB1_149_32657431_Q	0.9984	P	0.5599	0.5696	A	0.6291	0.96( 0.82 - 1.13)
32660055	AA_DRB1_31_32660055_F	0.9988	P	0.806	0.8136	A	0.63	0.95( 0.78 - 1.16)
32660109	AA_DRB1_13_32660109_F	0.9988	P	0.194	0.1864	A	0.63	1.05( 0.86 - 1.28)
30019249	AA_A_166_30019249	1.0034	E	0.8107	0.8032	D	0.6384	1.05( 0.86 - 1.29)
30019252	AA_A_167_30019252	1.003	W	0.8107	0.8032	G	0.6384	1.05( 0.86 - 1.29)
33160714	AA_DPB1_96_33160714_K	0.9926	P	0.5473	0.5381	A	0.6456	1.04( 0.89 - 1.22)
33160936	AA_DPB1_170_33160936_I	0.9925	P	0.5473	0.5381	A	0.6456	1.04( 0.89 - 1.22)
30019183	AA_A_144_30019183	1.0121	Q	0.2334	0.2258	K	0.6526	1.04( 0.87 - 1.26)
32660118	AA_DRB1_10_32660118_Q	1.0021	P	0.5426	0.5516	A	0.6531	0.96( 0.82 - 1.13)
32665457	AA_DRB1_-16_32665457_A	1.0024	A	0.4574	0.4484	P	0.6531	1.04( 0.88 - 1.22)
32665484	AA_DRB1_-25_32665484_K	1.0027	P	0.5426	0.5516	A	0.6531	0.96( 0.82 - 1.13)
33145629	AA_DPA1_7_33145629	1.0149	x	0.5426	0.5336	S	0.6553	1.04( 0.88 - 1.22)
33145632	AA_DPA1_6_33145632	1.0149	x	0.5426	0.5336	V	0.6553	1.04( 0.88 - 1.22)
33145635	AA_DPA1_5_33145635	1.0148	x	0.5426	0.5336	H	0.6553	1.04( 0.88 - 1.22)
33145638	AA_DPA1_4_33145638	1.0149	x	0.5426	0.5336	D	0.6553	1.04( 0.88 - 1.22)
33149228	AA_DPA1_2_33149228	1.0117	x	0.5426	0.5336	K	0.6573	1.04( 0.88 - 1.22)
33149231	AA_DPA1_1_33149231	1.0114	x	0.5426	0.5336	I	0.6573	1.04( 0.88 - 1.22)
30019132	AA_A_127_30019132	1.0155	N	0.5237	0.5147	K	0.6574	1.04( 0.88 - 1.22)
33145641	AA_DPA1_3_33145641	1.0146	x	0.5426	0.5337	A	0.6594	1.04( 0.88 - 1.22)
31431937	AA_B_178_31431937	1.0137	K	0.1672	0.1607	T	0.6616	1.05( 0.85 - 1.30)
31432689	AA_B_9_31432689_Y	0.9988	P	0.7808	0.7879	A	0.6677	0.96( 0.79 - 1.16)
30019066	AA_A_105_30019066	1.0026	P	0.2934	0.3012	S	0.673	0.96( 0.81 - 1.15)
30019036	AA_A_95_30019036_I	1.018	P	0.5347	0.5262	A	0.6749	1.04( 0.88 - 1.21)
30019093	AA_A_114_30019093_H	1.0184	P	0.4653	0.4738	A	0.6749	0.97( 0.82 - 1.13)
30019099	AA_A_116_30019099_Y	1.0183	P	0.4653	0.4738	A	0.6749	0.97( 0.82 - 1.13)
30018696	AA_A_62_30018696_G	1.0023	P	0.306	0.3137	A	0.6813	0.96( 0.81 - 1.15)
32665457	AA_DRB1_-16_32665457_V	0.993	P	0.4558	0.4476	A	0.6815	1.03( 0.88 - 1.21)
32665484	AA_DRB1_-25_32665484_R	0.993	P	0.4558	0.4476	A	0.6815	1.03( 0.88 - 1.21)
32740576	AA_DQB1_87_32740576_Y	1.0064	P	0.183	0.1766	A	0.6816	1.04( 0.85 - 1.28)
32742316	AA_DQB1_-17_32742316_A	0.8908	P	0.9085	0.9037	A	0.6831	1.06( 0.80 - 1.39)
30018732	AA_A_74_30018732	1.0016	D	0.694	0.6864	H	0.6835	1.04( 0.87 - 1.23)
32660058	AA_DRB1_30_32660058_Y	0.9727	P	0.5836	0.5917	A	0.6851	0.97( 0.82 - 1.14)
32660064	AA_DRB1_28_32660064_D	0.9696	P	0.5836	0.5917	A	0.6851	0.97( 0.82 - 1.14)
32660052	AA_DRB1_32_32660052	0.9657	H	0.3107	0.3035	Y	0.6982	1.03( 0.87 - 1.23)
32659968	AA_DRB1_60_32659968_Y	0.9639	P	0.5694	0.577	A	0.7032	0.97( 0.83 - 1.14)
31347080	AA_C_99_31347080_F	0.9934	P	0.1167	0.1217	A	0.7042	0.95( 0.75 - 1.22)
32660064	AA_DRB1_28_32660064_E	0.9736	P	0.2618	0.2552	A	0.7057	1.04( 0.86 - 1.24)
32740672	AA_DQB1_55_32740672_P	0.9771	P	0.459	0.4665	A	0.7086	0.97( 0.83 - 1.14)
30019099	AA_A_116_30019099_D	1.0133	P	0.4621	0.4696	A	0.7124	0.97( 0.83 - 1.14)
30018678	AA_A_56_30018678	1.0121	R	0.09779	0.09346	G	0.7132	1.05( 0.81 - 1.37)
32660100	AA_DRB1_16_32660100_Q	0.8767	P	0.01577	0.0177	A	0.7175	0.89( 0.47 - 1.68)
31431997	AA_B_158_31431997	0.9853	A	0.9432	0.94	T	0.7336	1.06( 0.75 - 1.49)
31432476	AA_B_80_31432476_I	1.0002	P	0.1751	0.17	A	0.7363	1.04( 0.84 - 1.28)
33156607	AA_DPB1_65_33156607_I	0.9045	P	0.9322	0.9287	A	0.738	1.06( 0.77 - 1.45)
30019177	AA_A_142_30019177	1.002	I	0.6845	0.6783	T	0.7422	1.03( 0.87 - 1.22)
30019186	AA_A_145_30019186	1.0021	R	0.6845	0.6783	H	0.7422	1.03( 0.87 - 1.22)
32659938	AA_DRB1_70_32659938_R	0.9879	P	0.2366	0.231	A	0.7441	1.03( 0.86 - 1.24)
30019042	AA_A_97_30019042_M	1.0004	P	0.3186	0.3126	A	0.7492	1.03( 0.87 - 1.22)
31347429	AA_C_66_31347429	0.914	K	0.9385	0.9353	N	0.7497	1.06( 0.76 - 1.47)
33156607	AA_DPB1_65_33156607_L	0.8943	P	0.06782	0.07113	A	0.7501	0.95( 0.69 - 1.30)
32717275	AA_DQA1_75_32717275	0.9868	S	0.1751	0.1703	I	0.7534	1.03( 0.84 - 1.27)
32717784	AA_DQA1_107_32717784_T	0.9854	P	0.8249	0.8297	A	0.7534	0.97( 0.79 - 1.19)
32717784	AA_DQA1_107_32717784_I	0.9868	P	0.1751	0.1703	A	0.7534	1.03( 0.84 - 1.27)
32717931	AA_DQA1_156_32717931_F	0.9864	P	0.8249	0.8297	A	0.7534	0.97( 0.79 - 1.19)
32717931	AA_DQA1_156_32717931_L	0.9868	P	0.1751	0.1703	A	0.7534	1.03( 0.84 - 1.27)
32717946	AA_DQA1_161_32717946_D	0.9829	P	0.8249	0.8297	A	0.7534	0.97( 0.79 - 1.19)
32717946	AA_DQA1_161_32717946_E	0.9868	P	0.1751	0.1703	A	0.7534	1.03( 0.84 - 1.27)
32717952	AA_DQA1_163_32717952_I	0.9844	P	0.8249	0.8297	A	0.7534	0.97( 0.79 - 1.19)
32717952	AA_DQA1_163_32717952_S	0.9868	P	0.1751	0.1703	A	0.7534	1.03( 0.84 - 1.27)
32717988	AA_DQA1_175_32717988_K	0.9868	P	0.1751	0.1703	A	0.7534	1.03( 0.84 - 1.27)
32659938	AA_DRB1_70_32659938_D	0.9737	P	0.4479	0.4418	A	0.7579	1.03( 0.87 - 1.20)
30019036	AA_A_95_30019036_V	1.0038	P	0.3044	0.3101	A	0.7598	0.97( 0.82 - 1.16)
30019072	AA_A_107_30019072	1.0039	G	0.6956	0.6899	W	0.7598	1.03( 0.86 - 1.22)
31347408	AA_C_73_31347408	0.9852	A	0.3864	0.3808	T	0.7722	1.02( 0.87 - 1.21)
32660112	AA_DRB1_12_32660112	1.0023	T	0.4401	0.4345	K	0.7801	1.02( 0.87 - 1.20)
32660115	AA_DRB1_11_32660115_S	1.0023	P	0.4401	0.4345	A	0.7801	1.02( 0.87 - 1.20)
32660118	AA_DRB1_10_32660118_Y	1.0023	P	0.4401	0.4345	A	0.7801	1.02( 0.87 - 1.20)
32659968	AA_DRB1_60_32659968_H	0.9158	P	0.0489	0.04653	A	0.7816	1.05( 0.73 - 1.52)
32659977	AA_DRB1_57_32659977_A	0.9158	P	0.0489	0.04653	A	0.7816	1.05( 0.73 - 1.52)
32660055	AA_DRB1_31_32660055_I	1.0027	P	0.1767	0.1725	A	0.786	1.03( 0.84 - 1.27)
31431315	AA_B_194_31431315_I	0.9965	P	0.7997	0.7953	A	0.7862	1.03( 0.84 - 1.25)
32659968	AA_DRB1_60_32659968_S	0.9732	P	0.3817	0.3765	A	0.7888	1.02( 0.87 - 1.20)
32659977	AA_DRB1_57_32659977_V	0.9732	P	0.3817	0.3765	A	0.7888	1.02( 0.87 - 1.20)
31431315	AA_B_194_31431315_V	0.9967	P	0.2003	0.2047	A	0.7889	0.97( 0.80 - 1.19)
32659974	AA_DRB1_58_32659974	0.9043	A	0.929	0.9262	E	0.7902	1.04( 0.77 - 1.42)
31432689	AA_B_9_31432689_H	0.9988	P	0.2082	0.2039	A	0.7912	1.03( 0.84 - 1.25)
32659947	AA_DRB1_67_32659947_F	0.9769	P	0.3186	0.3235	A	0.797	0.98( 0.83 - 1.16)
32742259	AA_DQB1_3_32742259_S	0.8758	P	0.9211	0.9183	A	0.7975	1.04( 0.77 - 1.39)
31432078	AA_B_131_31432078	1.0069	R	0.2413	0.237	S	0.8024	1.02( 0.85 - 1.23)
31347799	AA_C_-15_31347799_I	0.9756	P	0.7792	0.7833	A	0.8058	0.98( 0.81 - 1.18)
30019207	AA_A_152_30019207_V	0.9332	P	0.5962	0.601	A	0.8096	0.98( 0.83 - 1.15)
32659977	AA_DRB1_57_32659977_S	0.9842	P	0.1136	0.1105	A	0.8114	1.03( 0.80 - 1.32)
31432581	AA_B_45_31432581_T	0.9874	P	0.2192	0.2232	A	0.8128	0.98( 0.81 - 1.18)
32717170	AA_DQA1_40_32717170	1.0042	E	0.7366	0.7326	G	0.8215	1.02( 0.85 - 1.22)
32717191	AA_DQA1_47_32717191_C	1.0042	P	0.2634	0.2674	A	0.8215	0.98( 0.82 - 1.17)
32717200	AA_DQA1_50_32717200_V	1.0042	P	0.2634	0.2674	A	0.8215	0.98( 0.82 - 1.17)
32717203	AA_DQA1_51_32717203	1.0042	F	0.7366	0.7326	L	0.8215	1.02( 0.85 - 1.22)
32717209	AA_DQA1_53_32717209_Q	1.0042	P	0.2634	0.2674	A	0.8215	0.98( 0.82 - 1.17)
32656004	AA_DRB1_233_32656004_T	0.9879	P	0.6356	0.6399	A	0.8248	0.98( 0.83 - 1.16)
33160714	AA_DPB1_96_33160714_R	1.0051	P	0.4401	0.4444	A	0.8283	0.98( 0.84 - 1.15)
33160936	AA_DPB1_170_33160936_T	1.0051	P	0.4401	0.4444	A	0.8283	0.98( 0.84 - 1.15)
31432865	AA_B_-8_31432865_L	1.0086	P	0.5505	0.5462	A	0.8316	1.02( 0.87 - 1.19)
31432865	AA_B_-8_31432865_V	1.0092	P	0.4495	0.4536	A	0.8404	0.98( 0.84 - 1.15)
33156577	AA_DPB1_55_33156577_E	0.998	P	0.4653	0.4693	A	0.8429	0.98( 0.84 - 1.15)
32740624	AA_DQB1_71_32740624_A	0.999	P	0.1483	0.1455	A	0.8484	1.02( 0.82 - 1.28)
32656004	AA_DRB1_233_32656004_R	0.9827	P	0.3628	0.3591	A	0.8496	1.02( 0.86 - 1.20)
31346921	AA_C_152_31346921_E	0.9957	P	0.7082	0.7047	A	0.851	1.02( 0.85 - 1.21)
32737910	AA_DQB1_126_32737910_Q	1.023	P	0.9416	0.9398	A	0.8513	1.03( 0.74 - 1.45)
32737910	AA_DQB1_126_32737910_H	1.0166	P	0.05836	0.06016	A	0.8513	0.97( 0.69 - 1.36)
32740795	AA_DQB1_14_32740795	0.992	L	0.1483	0.1456	M	0.8515	1.02( 0.82 - 1.28)
32742280	AA_DQB1_-5_32742280_S	0.9949	P	0.1483	0.1456	A	0.8515	1.02( 0.82 - 1.28)
32742292	AA_DQB1_-9_32742292_I	0.9949	P	0.1483	0.1456	A	0.8515	1.02( 0.82 - 1.28)
33156517	AA_DPB1_35_33156517_L	0.9988	P	0.4637	0.46	A	0.8522	1.02( 0.87 - 1.19)
30018696	AA_A_62_30018696_E	1.0145	P	0.1609	0.1636	A	0.8541	0.98( 0.79 - 1.22)
30018705	AA_A_65_30018705	1.0142	R	0.8391	0.8364	G	0.8541	1.02( 0.82 - 1.27)
30019036	AA_A_95_30019036_L	1.0119	P	0.1609	0.1636	A	0.8541	0.98( 0.79 - 1.22)
30019048	AA_A_99_30019048_F	1.0123	P	0.1609	0.1636	A	0.8541	0.98( 0.79 - 1.22)
32742346	AA_DQB1_-27_32742346_S	0.9944	P	0.1483	0.1457	A	0.8546	1.02( 0.82 - 1.28)
30019093	AA_A_114_30019093_R	1.0044	P	0.3123	0.3089	A	0.8549	1.02( 0.86 - 1.21)
33161588	AA_DPB1_205_33161588_M	0.9924	P	0.3975	0.3943	A	0.8709	1.01( 0.86 - 1.19)
31347038	AA_C_113_31347038	0.8767	Y	0.9511	0.9497	H	0.8717	1.03( 0.71 - 1.49)
31432644	AA_B_24_31432644_A	1.0043	P	0.5142	0.5111	A	0.8775	1.01( 0.86 - 1.19)
31432132	AA_B_113_31432132	0.939	H	0.8896	0.8877	Y	0.8793	1.02( 0.79 - 1.31)
31347799	AA_C_-15_31347799_L	0.9805	P	0.2192	0.2168	A	0.8825	1.02( 0.84 - 1.23)
31432581	AA_B_45_31432581_E	0.9626	P	0.1735	0.1757	A	0.8847	0.98( 0.80 - 1.21)
33156577	AA_DPB1_55_33156577_D	0.9734	P	0.388	0.3853	A	0.8894	1.01( 0.86 - 1.19)
33156580	AA_DPB1_56_33156580	0.9734	E	0.388	0.3853	A	0.8894	1.01( 0.86 - 1.19)
31432527	AA_B_63_31432527	0.9653	N	0.3454	0.3429	E	0.8964	1.01( 0.86 - 1.19)
30019240	AA_A_163_30019240_T	0.9976	P	0.7161	0.7139	A	0.9046	1.01( 0.85 - 1.21)
30019240	AA_A_163_30019240_R	0.9985	P	0.2839	0.2861	A	0.9046	0.99( 0.83 - 1.18)
32740759	AA_DQB1_26_32740759_G	0.9873	P	0.1987	0.2006	A	0.9079	0.99( 0.81 - 1.21)
30020064	AA_A_245_30020064_A	0.96	P	0.989	0.9885	A	0.9089	1.05( 0.49 - 2.23)
30020064	AA_A_245_30020064_V	0.9795	P	0.01104	0.01153	A	0.9089	0.96( 0.45 - 2.04)
31346133	AA_C_219_31346133_W	1.0031	P	0.5189	0.5166	A	0.9092	1.01( 0.86 - 1.18)
30018780	AA_A_90_30018780	1.0055	A	0.7145	0.7124	D	0.9093	1.01( 0.85 - 1.20)
31346909	AA_C_156_31346909_W	0.9701	P	0.1388	0.1372	A	0.9099	1.01( 0.81 - 1.27)
32740615	AA_DQB1_74_32740615_S	0.9901	P	0.1987	0.2006	A	0.9107	0.99( 0.81 - 1.21)
31346133	AA_C_219_31346133_R	1.0014	P	0.4811	0.4832	A	0.9181	0.99( 0.85 - 1.16)
31432581	AA_B_45_31432581_K	0.9954	P	0.2145	0.2128	A	0.9188	1.01( 0.83 - 1.23)
32737107	AA_DQB1_224_32737107_Q	0.9983	P	0.8533	0.8547	A	0.9231	0.99( 0.79 - 1.24)
32737107	AA_DQB1_224_32737107_R	0.9952	P	0.1467	0.1453	A	0.9231	1.01( 0.81 - 1.27)
32737913	AA_DQB1_125_32737913_S	0.9952	P	0.1467	0.1453	A	0.9231	1.01( 0.81 - 1.27)
32737940	AA_DQB1_116_32737940_V	0.9978	P	0.8533	0.8547	A	0.9231	0.99( 0.79 - 1.24)
32737940	AA_DQB1_116_32737940_I	0.9952	P	0.1467	0.1453	A	0.9231	1.01( 0.81 - 1.27)
32660058	AA_DRB1_30_32660058_G	1.0066	P	0.1546	0.1532	A	0.9233	1.01( 0.81 - 1.26)
32660064	AA_DRB1_28_32660064_H	1.0066	P	0.1546	0.1532	A	0.9233	1.01( 0.81 - 1.26)
32660115	AA_DRB1_11_32660115_D	1.0061	P	0.1546	0.1532	A	0.9233	1.01( 0.81 - 1.26)
32737188	AA_DQB1_197_32737188_N	0.8948	P	0.07886	0.07989	A	0.9252	0.99( 0.73 - 1.32)
32737188	AA_DQB1_197_32737188_S	0.891	P	0.9211	0.9201	A	0.9252	1.01( 0.76 - 1.36)
32740726	AA_DQB1_37_32740726_D	0.8956	P	0.07886	0.07989	A	0.9252	0.99( 0.73 - 1.32)
32740810	AA_DQB1_9_32740810_L	0.8956	P	0.07886	0.07989	A	0.9252	0.99( 0.73 - 1.32)
32742259	AA_DQB1_3_32742259_P	0.8956	P	0.07886	0.07989	A	0.9252	0.99( 0.73 - 1.32)
32742316	AA_DQB1_-17_32742316_P	0.8956	P	0.07886	0.07989	A	0.9252	0.99( 0.73 - 1.32)
33156577	AA_DPB1_55_33156577_A	0.9243	P	0.1467	0.1454	A	0.9294	1.01( 0.81 - 1.26)
32660121	AA_DRB1_9_32660121_K	1.0031	P	0.1546	0.1533	A	0.9326	1.01( 0.81 - 1.26)
32742292	AA_DQB1_-9_32742292_M	0.9827	P	0.8391	0.838	A	0.9376	1.01( 0.81 - 1.25)
32717125	AA_DQA1_25_32717125	1.0013	F	0.2744	0.273	Y	0.9377	1.01( 0.84 - 1.20)
32742346	AA_DQB1_-27_32742346_A	0.9826	P	0.8391	0.838	A	0.9406	1.01( 0.81 - 1.25)
31432180	AA_B_97_31432180_V	1.0017	P	0.01104	0.01131	A	0.9501	0.98( 0.46 - 2.08)
31432620	AA_B_32_31432620	0.9993	Q	0.7776	0.7767	L	0.9553	1.01( 0.83 - 1.22)
31432488	AA_B_76_31432488	0.9426	V	0.1136	0.1129	E	0.9559	1.01( 0.78 - 1.29)
32740666	AA_DQB1_57_32740666_S	1.0157	P	0.05994	0.06044	A	0.9581	0.99( 0.71 - 1.38)
31432509	AA_B_69_31432509_R	0.942	P	0.1136	0.1129	A	0.9594	1.01( 0.78 - 1.29)
31432518	AA_B_66_31432518_K	0.9413	P	0.1136	0.113	A	0.963	1.01( 0.78 - 1.29)
30019219	AA_A_156_30019219_L	0.9309	P	0.5142	0.5151	A	0.9644	1( 0.85 - 1.17)
33145617	AA_DPA1_11_33145617	1.0026	A	0.4874	0.4865	M	0.9647	1( 0.86 - 1.18)
31432871	AA_B_-10_31432871_A	1.0105	P	0.2382	0.2374	A	0.9652	1( 0.83 - 1.21)
30018696	AA_A_62_30018696_Q	1.0122	P	0.3959	0.3968	A	0.9655	1( 0.85 - 1.17)
33156640	AA_DPB1_76_33156640_M	0.9638	P	0.8438	0.8444	A	0.9702	1( 0.80 - 1.24)
31432871	AA_B_-10_31432871_G	1.0092	P	0.7618	0.7624	A	0.973	1( 0.83 - 1.20)
30020277	AA_A_282_30020277_I	1.007	P	0.836	0.8356	A	0.9794	1( 0.81 - 1.24)
30020277	AA_A_282_30020277_V	1.0092	P	0.164	0.1644	A	0.9794	1( 0.81 - 1.24)
30020364	AA_A_311_30020364_K	1.0078	P	0.836	0.8356	A	0.9794	1( 0.81 - 1.24)
30020364	AA_A_311_30020364_N	1.0092	P	0.164	0.1644	A	0.9794	1( 0.81 - 1.24)
31432123	AA_B_116_31432123_F	0.9486	P	0.08202	0.08227	A	0.9821	1( 0.75 - 1.33)
30019048	AA_A_99_30019048_Y	0.923	P	0.7445	0.7442	A	0.9876	1( 0.84 - 1.20)
33156520	AA_DPB1_36_33156520	0.9234	A	0.1467	0.1465	V	0.9895	1( 0.80 - 1.25)

## Sheet: Supplementary Table S4
Supplementary Table 4. Association results of the 2- and 4-digit alleles the classical HLA genes with BA risk in Chinese population.
Build 37 position (bp)	Variant ID	plink INFO score		Allele 1 Frequency			Plogitic	OR (95%CI)
			Allele 1	317 BA patients	8,843 controls	Allele 2
32739039	HLA_DQB1_02	0.9887	P	0.1672	0.1209	A	0.0004753	1.46( 1.18 - 1.81)
32739039	HLA_DQB1_0201	0.9891	P	0.1672	0.1209	A	0.0004753	1.46( 1.18 - 1.81)
32660042	HLA_DRB1_15	1.0248	P	0.1057	0.1537	A	0.0009408	0.65( 0.50 - 0.84)
31431272	HLA_B_58	1	P	0.08517	0.05569	A	0.001615	1.58( 1.19 - 2.10)
31431272	HLA_B_5801	1.001	P	0.08517	0.05569	A	0.001615	1.58( 1.19 - 2.10)
31431272	HLA_B_1501	0.8639	P	0.04259	0.07486	A	0.00225	0.55( 0.37 - 0.81)
31346171	HLA_C_0302	1.0081	P	0.08517	0.05649	A	0.002294	1.56( 1.17 - 2.07)
32660042	HLA_DRB1_1501	0.9998	P	0.08517	0.1224	A	0.004747	0.67( 0.50 - 0.89)
32739039	HLA_DQB1_0602	1.0128	P	0.05521	0.08668	A	0.005381	0.62( 0.44 - 0.87)
31346171	HLA_C_0303	0.9897	P	0.04574	0.07305	A	0.008998	0.61( 0.42 - 0.89)
32660042	HLA_DRB1_03	0.9997	P	0.06782	0.04563	A	0.009044	1.52( 1.11 - 2.09)
32660042	HLA_DRB1_0301	0.9997	P	0.06782	0.04563	A	0.009044	1.52( 1.11 - 2.09)
33157346	HLA_DPB1_17	0.9991	P	0.05678	0.03681	A	0.009296	1.58( 1.12 - 2.23)
33157346	HLA_DPB1_1701	0.9992	P	0.05678	0.03681	A	0.009296	1.58( 1.12 - 2.23)
31346171	HLA_C_1203	0.9739	P	0.006309	0.01894	A	0.0204	0.33( 0.12 - 0.88)
30019970	HLA_A_26	0.9977	P	0.0142	0.02968	A	0.02273	0.47( 0.24 - 0.91)
31346171	HLA_C_12	0.9624	P	0.03155	0.05168	A	0.02354	0.6( 0.38 - 0.94)
30019970	HLA_A_2601	1.0048	P	0.0142	0.02951	A	0.02388	0.47( 0.24 - 0.92)
31431272	HLA_B_15	0.9418	P	0.1041	0.1351	A	0.02423	0.74( 0.57 - 0.96)
32739039	HLA_DQB1_06	0.9787	P	0.1751	0.2122	A	0.02437	0.79( 0.64 - 0.97)
31431272	HLA_B_54	0.8946	P	0.05678	0.03981	A	0.0329	1.45( 1.03 - 2.05)
31431272	HLA_B_5401	0.8946	P	0.05678	0.03981	A	0.0329	1.45( 1.03 - 2.05)
30019970	HLA_A_03	0.9691	P	0.01735	0.03251	A	0.03304	0.53( 0.29 - 0.96)
30019970	HLA_A_33	0.9942	P	0.1025	0.07916	A	0.03308	1.33( 1.02 - 1.73)
30019970	HLA_A_3303	0.9951	P	0.1025	0.07916	A	0.03308	1.33( 1.02 - 1.73)
30019970	HLA_A_0301	0.9623	P	0.01735	0.03229	A	0.03514	0.53( 0.29 - 0.97)
32660042	HLA_DRB1_1301	0.9836	P	0.004732	0.0147	A	0.03814	0.32( 0.10 - 1.00)
33157346	HLA_DPB1_0402	0.9813	P	0.06467	0.04744	A	0.04622	1.39( 1.00 - 1.92)
31346171	HLA_C_06	1.0093	P	0.1088	0.08628	A	0.04784	1.29( 1.00 - 1.67)
31346171	HLA_C_0602	1.0093	P	0.1088	0.08628	A	0.04784	1.29( 1.00 - 1.67)
31431272	HLA_B_1302	1.0047	P	0.07413	0.05643	A	0.05896	1.34( 0.99 - 1.81)
32716284	HLA_DQA1_02	1.0333	P	0.1104	0.08934	A	0.06858	1.27( 0.98 - 1.63)
32716284	HLA_DQA1_0201	1.0333	P	0.1104	0.08934	A	0.06858	1.27( 0.98 - 1.63)
32716284	HLA_DQA1_01	1.0325	P	0.3438	0.3791	A	0.07241	0.86( 0.73 - 1.01)
31346171	HLA_C_0704	1	P	0.003155	0.01029	A	0.07664	0.3( 0.08 - 1.23)
33145064	HLA_DPA1_04	0.838	P	0.02997	0.02002	A	0.08126	1.51( 0.95 - 2.42)
33145064	HLA_DPA1_0401	0.838	P	0.02997	0.02002	A	0.08126	1.51( 0.95 - 2.42)
31431272	HLA_B_52	0.9912	P	0.01577	0.02714	A	0.08133	0.57( 0.31 - 1.08)
31431272	HLA_B_5201	0.9915	P	0.01577	0.02714	A	0.08133	0.57( 0.31 - 1.08)
32739039	HLA_DQB1_0603	0.9808	P	0.006309	0.01447	A	0.08765	0.43( 0.16 - 1.16)
30019970	HLA_A_30	1.0091	P	0.07256	0.05671	A	0.09159	1.3( 0.96 - 1.77)
30019970	HLA_A_3001	1.0089	P	0.07256	0.05671	A	0.09159	1.3( 0.96 - 1.77)
32716284	HLA_DQA1_0102	1.0025	P	0.1514	0.1772	A	0.09417	0.83( 0.66 - 1.03)
32660042	HLA_DRB1_07	1.0329	P	0.1088	0.08985	A	0.1016	1.24( 0.96 - 1.60)
32660042	HLA_DRB1_0701	1.0329	P	0.1088	0.08985	A	0.1016	1.24( 0.96 - 1.60)
33157346	HLA_DPB1_13	0.9594	P	0.0694	0.05451	A	0.1061	1.29( 0.95 - 1.77)
33157346	HLA_DPB1_1301	0.9593	P	0.0694	0.05451	A	0.1061	1.29( 0.95 - 1.77)
33157346	HLA_DPB1_0201	0.9622	P	0.1845	0.2098	A	0.1247	0.85( 0.70 - 1.05)
30019970	HLA_A_31	0.9865	P	0.02524	0.03681	A	0.1264	0.68( 0.41 - 1.12)
30019970	HLA_A_3101	0.9869	P	0.02524	0.03681	A	0.1264	0.68( 0.41 - 1.12)
32660042	HLA_DRB1_1502	0.987	P	0.0205	0.03093	A	0.1341	0.66( 0.38 - 1.14)
31346171	HLA_C_0702	1.0084	P	0.1703	0.1488	A	0.1342	1.18( 0.95 - 1.45)
30019970	HLA_A_1101	1.0188	P	0.2271	0.2032	A	0.141	1.15( 0.95 - 1.39)
33157346	HLA_DPB1_02	0.96	P	0.2429	0.2691	A	0.1437	0.87( 0.72 - 1.05)
31431272	HLA_B_35	0.9408	P	0.04101	0.05428	A	0.1457	0.75( 0.50 - 1.11)
30019970	HLA_A_0206	0.9901	P	0.05205	0.06604	A	0.162	0.78( 0.54 - 1.11)
31346171	HLA_C_01	1.0312	P	0.183	0.1628	A	0.177	1.15( 0.94 - 1.41)
31346171	HLA_C_0102	1.0308	P	0.183	0.1628	A	0.177	1.15( 0.94 - 1.41)
32660042	HLA_DRB1_12	0.9326	P	0.1151	0.1329	A	0.194	0.85( 0.66 - 1.09)
32739039	HLA_DQB1_0302	0.939	P	0.06782	0.05575	A	0.1945	1.23( 0.90 - 1.69)
33157346	HLA_DPB1_0401	0.9226	P	0.07413	0.08894	A	0.1969	0.82( 0.61 - 1.11)
31431272	HLA_B_4001	1.0303	P	0.1151	0.09974	A	0.2046	1.18( 0.92 - 1.51)
31346171	HLA_C_15	0.9005	P	0.02839	0.03788	A	0.2168	0.74( 0.46 - 1.19)
30019970	HLA_A_32	0.9841	P	0.007886	0.01363	A	0.2173	0.58( 0.24 - 1.40)
30019970	HLA_A_3201	0.9842	P	0.007886	0.01363	A	0.2173	0.58( 0.24 - 1.40)
31346171	HLA_C_1502	0.9927	P	0.02839	0.03777	A	0.2216	0.74( 0.46 - 1.20)
32739039	HLA_DQB1_0301	0.9575	P	0.2256	0.2466	A	0.2258	0.89( 0.74 - 1.08)
31346171	HLA_C_08	1.0074	P	0.1025	0.118	A	0.2343	0.85( 0.66 - 1.11)
31346171	HLA_C_0801	0.997	P	0.1025	0.1179	A	0.2359	0.85( 0.66 - 1.11)
32739039	HLA_DQB1_0609	1.0079	P	0.02208	0.01606	A	0.2387	1.38( 0.80 - 2.38)
33157346	HLA_DPB1_21	0.9728	P	0.009464	0.01521	A	0.2424	0.62( 0.27 - 1.40)
33157346	HLA_DPB1_2101	0.9706	P	0.009464	0.01521	A	0.2424	0.62( 0.27 - 1.40)
31431272	HLA_B_51	0.9899	P	0.06309	0.07537	A	0.2486	0.83( 0.60 - 1.14)
31431272	HLA_B_37	0.9821	P	0.01735	0.01227	A	0.2569	1.42( 0.77 - 2.62)
31431272	HLA_B_3701	0.9821	P	0.01735	0.01227	A	0.2569	1.42( 0.77 - 2.62)
30019970	HLA_A_11	1.0229	P	0.2413	0.2224	A	0.2617	1.11( 0.92 - 1.34)
31346171	HLA_C_0401	0.9991	P	0.05205	0.06265	A	0.278	0.82( 0.58 - 1.17)
31431272	HLA_B_0702	1.0215	P	0.01577	0.02199	A	0.2916	0.71( 0.38 - 1.34)
33145064	HLA_DPA1_01	0.9938	P	0.3344	0.3546	A	0.2949	0.91( 0.77 - 1.08)
31431272	HLA_B_13	0.9949	P	0.1183	0.1053	A	0.295	1.14( 0.89 - 1.46)
31346171	HLA_C_0304	0.9774	P	0.09148	0.1044	A	0.2959	0.86( 0.66 - 1.14)
31346171	HLA_C_1202	1.014	P	0.02524	0.03268	A	0.2984	0.77( 0.46 - 1.27)
33145064	HLA_DPA1_0103	0.9936	P	0.3344	0.3542	A	0.3043	0.92( 0.77 - 1.08)
32716284	HLA_DQA1_03	1.0136	P	0.2823	0.2642	A	0.3083	1.1( 0.92 - 1.31)
32716284	HLA_DQA1_0301	1.0136	P	0.2823	0.2642	A	0.3083	1.1( 0.92 - 1.31)
31431272	HLA_B_5101	0.9526	P	0.06309	0.07367	A	0.3151	0.85( 0.61 - 1.17)
33157346	HLA_DPB1_0901	0.9188	P	0.0142	0.01979	A	0.318	0.71( 0.37 - 1.39)
31431272	HLA_B_44	0.8309	P	0.02366	0.01826	A	0.3212	1.3( 0.77 - 2.20)
31431272	HLA_B_4403	0.844	P	0.02366	0.01826	A	0.3212	1.3( 0.77 - 2.20)
33157346	HLA_DPB1_09	0.9169	P	0.0142	0.01973	A	0.3223	0.72( 0.37 - 1.39)
30019970	HLA_A_1102	0.975	P	0.0142	0.01934	A	0.3534	0.73( 0.37 - 1.42)
31431272	HLA_B_1502	0.9641	P	0.04732	0.04003	A	0.3592	1.19( 0.82 - 1.73)
31431272	HLA_B_39	0.9072	P	0.009464	0.01374	A	0.3609	0.69( 0.30 - 1.55)
31431272	HLA_B_3901	0.9087	P	0.009464	0.01374	A	0.3609	0.69( 0.30 - 1.55)
32660042	HLA_DRB1_0401	0.9646	P	0.01735	0.01323	A	0.375	1.32( 0.72 - 2.42)
32660042	HLA_DRB1_04	0.9971	P	0.1199	0.1088	A	0.3791	1.12( 0.87 - 1.43)
32716284	HLA_DQA1_06	0.9951	P	0.07886	0.08871	A	0.3906	0.88( 0.66 - 1.18)
32716284	HLA_DQA1_0601	0.995	P	0.07886	0.08871	A	0.3906	0.88( 0.66 - 1.18)
33145064	HLA_DPA1_0201	0.9847	P	0.123	0.1121	A	0.3906	1.11( 0.87 - 1.42)
31431272	HLA_B_1518	0.8738	P	0.01104	0.01521	A	0.3972	0.72( 0.34 - 1.54)
32716284	HLA_DQA1_0103	1.0021	P	0.08517	0.09499	A	0.4067	0.89( 0.67 - 1.18)
32660042	HLA_DRB1_1401	0.822	P	0.02997	0.02493	A	0.4261	1.21( 0.76 - 1.93)
31431272	HLA_B_3501	0.9222	P	0.02839	0.03421	A	0.4272	0.83( 0.51 - 1.33)
31346171	HLA_C_03	1.0074	P	0.2192	0.2327	A	0.4314	0.93( 0.76 - 1.12)
31346171	HLA_C_07	0.9912	P	0.1861	0.1743	A	0.4397	1.08( 0.88 - 1.33)
32660042	HLA_DRB1_10	1.0014	P	0.01735	0.01391	A	0.4692	1.25( 0.68 - 2.30)
32660042	HLA_DRB1_1001	0.9977	P	0.01735	0.01391	A	0.4692	1.25( 0.68 - 2.30)
32660042	HLA_DRB1_1302	1.01	P	0.03628	0.03121	A	0.4722	1.17( 0.76 - 1.79)
32739039	HLA_DQB1_0401	0.9517	P	0.03628	0.04207	A	0.4745	0.86( 0.56 - 1.31)
31346171	HLA_C_04	0.9915	P	0.06151	0.06881	A	0.475	0.89( 0.64 - 1.23)
30019970	HLA_A_01	1.0108	P	0.02839	0.03353	A	0.479	0.84( 0.52 - 1.36)
30019970	HLA_A_0101	1.0109	P	0.02839	0.03353	A	0.479	0.84( 0.52 - 1.36)
31431272	HLA_B_40	0.9973	P	0.1782	0.1677	A	0.486	1.08( 0.88 - 1.32)
32660042	HLA_DRB1_16	1.0115	P	0.03155	0.02714	A	0.5035	1.17( 0.74 - 1.84)
32660042	HLA_DRB1_1602	1.0113	P	0.03155	0.02714	A	0.5035	1.17( 0.74 - 1.84)
31431272	HLA_B_27	0.9191	P	0.007886	0.01063	A	0.5062	0.74( 0.30 - 1.81)
32660042	HLA_DRB1_0803	1.0043	P	0.06782	0.06169	A	0.5287	1.11( 0.81 - 1.52)
32660042	HLA_DRB1_08	0.9882	P	0.07729	0.0709	A	0.5389	1.1( 0.82 - 1.48)
31431272	HLA_B_48	0.9794	P	0.02681	0.0311	A	0.5405	0.86( 0.53 - 1.40)
31431272	HLA_B_4801	0.9812	P	0.02681	0.0311	A	0.5405	0.86( 0.53 - 1.40)
32660042	HLA_DRB1_13	0.9846	P	0.04101	0.04608	A	0.5488	0.89( 0.59 - 1.32)
32660042	HLA_DRB1_0405	0.9732	P	0.04259	0.04738	A	0.5759	0.89( 0.60 - 1.32)
33157346	HLA_DPB1_05	0.9875	P	0.3959	0.3854	A	0.5932	1.05( 0.89 - 1.23)
33157346	HLA_DPB1_0501	0.9875	P	0.3959	0.3854	A	0.5932	1.05( 0.89 - 1.23)
31346171	HLA_C_14	1.0064	P	0.05836	0.0536	A	0.6018	1.09( 0.78 - 1.54)
31346171	HLA_C_0701	0.9787	P	0.01262	0.01515	A	0.6067	0.83( 0.41 - 1.69)
33145064	HLA_DPA1_02	0.9829	A	0.3644	0.3744	P	0.6068	0.96( 0.81 - 1.13)
31431272	HLA_B_1301	0.9997	P	0.04416	0.04863	A	0.6072	0.9( 0.62 - 1.33)
31431272	HLA_B_07	1.0164	P	0.02524	0.02861	A	0.6159	0.88( 0.53 - 1.46)
32739039	HLA_DQB1_0604	0.9908	P	0.01262	0.01504	A	0.6216	0.84( 0.41 - 1.70)
32739039	HLA_DQB1_04	0.9881	P	0.05047	0.05502	A	0.6217	0.91( 0.64 - 1.31)
32660042	HLA_DRB1_01	1.0129	P	0.02208	0.01934	A	0.6228	1.15( 0.67 - 1.97)
32660042	HLA_DRB1_0101	1.0129	P	0.02208	0.01934	A	0.6228	1.15( 0.67 - 1.97)
32660042	HLA_DRB1_0406	0.8946	P	0.02524	0.0225	A	0.6492	1.13( 0.68 - 1.87)
32739039	HLA_DQB1_0501	0.9944	P	0.04732	0.04382	A	0.6728	1.08( 0.75 - 1.58)
32660042	HLA_DRB1_1202	0.9948	P	0.0836	0.08792	A	0.7052	0.95( 0.71 - 1.26)
32739039	HLA_DQB1_03	0.9781	P	0.459	0.4665	A	0.7107	0.97( 0.83 - 1.14)
32660042	HLA_DRB1_1405	0.8255	P	0.01577	0.0177	A	0.7175	0.89( 0.47 - 1.68)
31431272	HLA_B_38	0.9275	P	0.03943	0.03698	A	0.748	1.07( 0.71 - 1.61)
31431272	HLA_B_3802	0.9286	P	0.03943	0.03698	A	0.748	1.07( 0.71 - 1.61)
32716284	HLA_DQA1_05	0.9864	P	0.1751	0.1703	A	0.7534	1.03( 0.84 - 1.27)
32716284	HLA_DQA1_0501	0.9868	P	0.1751	0.1703	A	0.7534	1.03( 0.84 - 1.27)
32660042	HLA_DRB1_14	0.9659	P	0.06782	0.06502	A	0.7789	1.05( 0.76 - 1.43)
32739039	HLA_DQB1_0402	0.8959	P	0.0142	0.01295	A	0.7852	1.1( 0.56 - 2.15)
32660042	HLA_DRB1_1101	0.9041	P	0.07098	0.07384	A	0.7862	0.96( 0.70 - 1.30)
32660042	HLA_DRB1_11	0.9035	P	0.07098	0.07379	A	0.7902	0.96( 0.70 - 1.31)
31346171	HLA_C_1402	1.0135	P	0.04574	0.04371	A	0.8057	1.05( 0.72 - 1.53)
30019970	HLA_A_2402	0.9753	P	0.1577	0.1613	A	0.8123	0.97( 0.78 - 1.21)
30019970	HLA_A_02	1	P	0.3044	0.3087	A	0.8178	0.98( 0.83 - 1.16)
30019970	HLA_A_24	1.0082	P	0.1609	0.1639	A	0.8423	0.98( 0.79 - 1.21)
32739039	HLA_DQB1_0502	1.0165	P	0.05836	0.06016	A	0.8513	0.97( 0.69 - 1.36)
33157346	HLA_DPB1_04	0.9517	P	0.1388	0.1364	A	0.8614	1.02( 0.81 - 1.28)
33157346	HLA_DPB1_03	0.9257	P	0.04574	0.04699	A	0.8842	0.97( 0.67 - 1.42)
33157346	HLA_DPB1_0301	0.9242	P	0.04574	0.04699	A	0.8842	0.97( 0.67 - 1.42)
30019970	HLA_A_68	0.9789	P	0.01104	0.01153	A	0.9089	0.96( 0.45 - 2.04)
30019970	HLA_A_6801	0.9787	P	0.01104	0.01153	A	0.9089	0.96( 0.45 - 2.04)
32739039	HLA_DQB1_0303	0.9871	P	0.1656	0.1641	A	0.9186	1.01( 0.82 - 1.25)
33157346	HLA_DPB1_0202	0.9811	P	0.05836	0.05931	A	0.9205	0.98( 0.70 - 1.38)
32739039	HLA_DQB1_05	0.9954	P	0.1467	0.1453	A	0.9231	1.01( 0.81 - 1.27)
32660042	HLA_DRB1_09	1.0066	P	0.1546	0.1532	A	0.9233	1.01( 0.81 - 1.26)
32660042	HLA_DRB1_0901	1.0066	P	0.1546	0.1532	A	0.9233	1.01( 0.81 - 1.26)
32739039	HLA_DQB1_0601	0.8956	P	0.07886	0.07989	A	0.9252	0.99( 0.73 - 1.32)
33157346	HLA_DPB1_14	0.8995	P	0.02208	0.02262	A	0.9291	0.98( 0.57 - 1.67)
33157346	HLA_DPB1_1401	0.9005	P	0.02208	0.02262	A	0.9291	0.98( 0.57 - 1.67)
31431272	HLA_B_57	1.0019	P	0.01104	0.01131	A	0.9501	0.98( 0.46 - 2.08)
31431272	HLA_B_5701	1.0028	P	0.01104	0.01131	A	0.9501	0.98( 0.46 - 2.08)
32716284	HLA_DQA1_0101	0.997	P	0.1073	0.1066	A	0.9605	1.01( 0.78 - 1.30)
31431272	HLA_B_4006	0.9147	P	0.06151	0.06197	A	0.9627	0.99( 0.71 - 1.38)
33145064	HLA_DPA1_0202	1.0027	A	0.4874	0.4865	P	0.9669	1( 0.86 - 1.18)
32739039	HLA_DQB1_0503	0.9991	P	0.04101	0.04133	A	0.968	0.99( 0.67 - 1.48)
31431272	HLA_B_46	0.9473	P	0.1136	0.1131	A	0.97	1.01( 0.78 - 1.29)
31431272	HLA_B_4601	0.9474	P	0.1136	0.1131	A	0.97	1.01( 0.78 - 1.29)
